# Supplementary material
Source: PubMed Central journal article supplement (PMC7848698)

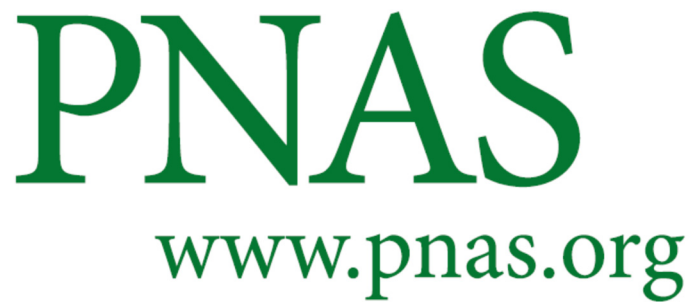

Supplementary Information for

Live-Cell Epigenome Manipulation by Synthetic Histone Acetylation Catalyst System

Yusuke Fujiwara<sup>1</sup>, Yuki Yamanashi<sup>1</sup>, Akiko Fujimura<sup>1</sup>, Yuko Sato<sup>2</sup>, Tomoya Kujirai<sup>3</sup>, Hitoshi Kurumizaka<sup>3</sup>, Hiroshi Kimura<sup>2</sup>, Kenzo Yamatsugu<sup>1</sup>, Shigehiro A. Kawashima<sup>1</sup>, and Motomu Kanai<sup>1</sup>

<sup>1</sup>Graduate School of Pharmaceutical Sciences, The University of Tokyo, Tokyo, 113-0033, Japan

<sup>2</sup>Cell Biology Center, Institute of Innovative Research, Tokyo Institute of Technology, Yokohama, 226-8503, Japan

<sup>3</sup>Institute for Quantitative Biosciences, The University of Tokyo, Tokyo, 113-0033, Japan.

\*Corresponding authors: Kenzo Yamatsugu, Shigehiro A. Kawashima, and Motomu Kanai

**Email:** yamatsugu@mol.f.u-tokyo.ac.jp, skawashima@mol.f.u-tokyo.ac.jp, or kanai@mol.f.u-tokyo.ac.jp.

**This PDF file includes:**

Figures S1 to S11

Tables S1 to S2

Experimental procedures

SI References

Spectral data

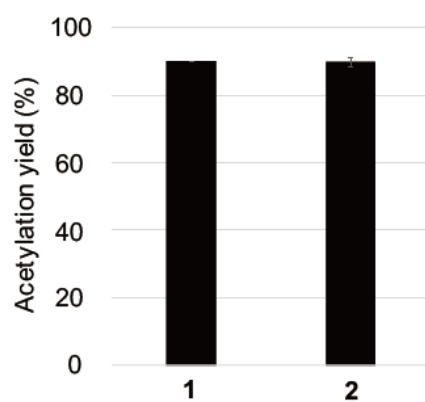

**Figure S1.** LC-MS/MS analysis of acetylation yield of H2BK120 on recombinant nucleosomes (0.37  $\mu$ M) treated with **3** (10 mM) and TCEP (0.1 mM) with **1** or **2** (2  $\mu$ M) at 37  $^{\circ}$ C for 5 h. Error bars represent the data range of two independent experiments.

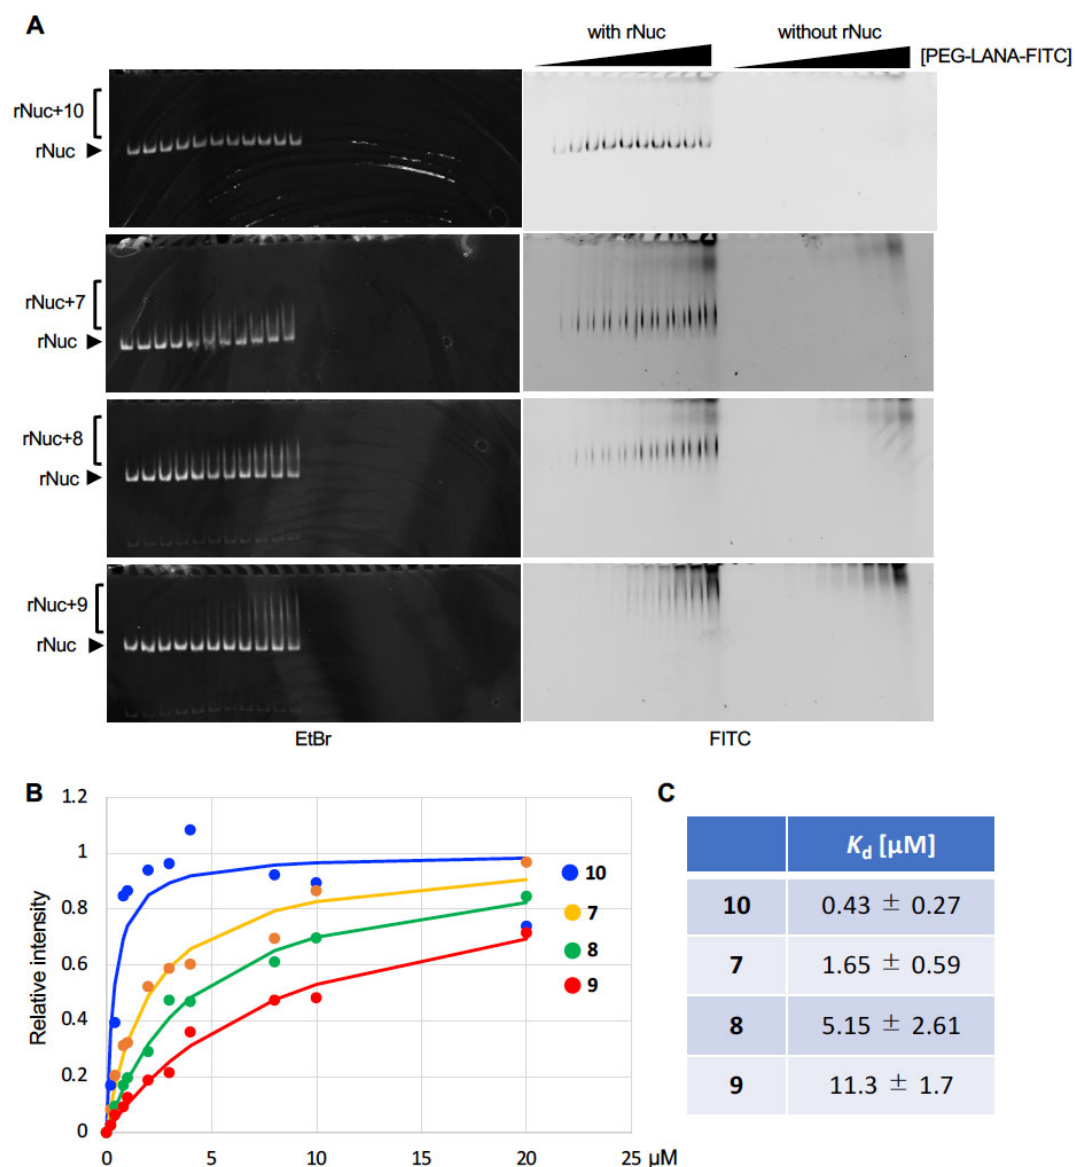

**Figure S2.** Electrophoretic mobility shift assay. (A) The indicated compounds (0, 0.2, 0.4, 0.8, 1, 2, 3, 4, 8, 10, and 20  $\mu\text{M}$ ) were incubated with or without recombinant nucleosomes (0.4  $\mu\text{M}$ ), in the presence of 150 mM KCl. The samples were then analyzed by 6% non-denaturing PAGE in 0.2 x TBE buffer. Recombinant nucleosomes were visualized by ethidium bromide staining (left). FITC signal of PEG-LANA-FITCs were detected (right). (B) Plot of relative FITC signals of each concentration of PEG-LANA-FITCs ( $\mu\text{M}$ ) to those when all nucleosomes bound to PEG-LANA-FITC. Data were fit to a Hill slope model yielding  $K_d$  values. Fitted curves were described by lines of each color. (C) Calculated  $K_d$  values of **7-10** based on Michaelis-Menten equation. See “Electrophoresis Mobility Shift Assay” section for details. Error bars represent standard deviations of three independent experiments.

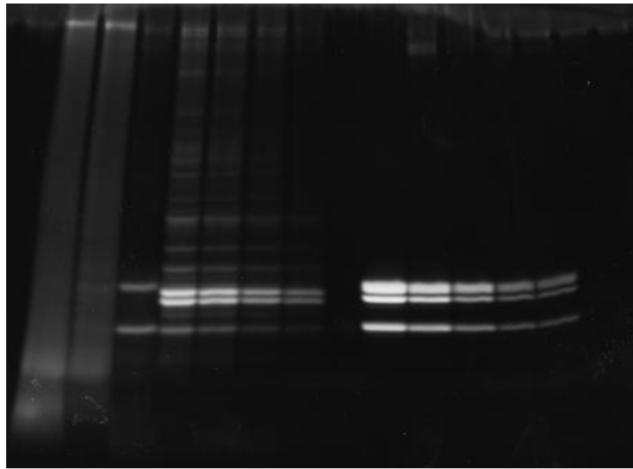

Waste other fraction (10 x10<sup>4</sup> cells)    H3    H2B Fraction (x10<sup>4</sup> cells)    15    10    5    2    1    0.5    0.25    0.125    0.0625  
 recombinant nucleosome (µgDNA)

|                               |                  |
|-------------------------------|------------------|
| Unit conversion of 147 bp DNA | 1 µg = 10.3 pmol |
| Nuclear radius                | 6 µm             |
| Vol. of nucleus               | 905 pL/cell      |
| Conc. of nucleosomes          | ~50 µM           |
| Conc. of acidic patches       | ~100 µM          |

**Figure S3.** Estimation of histone concentration in cells. SDS-PAGE image of purified histones from cells and recombinant nucleosomes was shown. Histone was visualized by Oriole Fluorescent Gel Stain. The amount of nucleosome was calculated by calibration curve of H2A intensity of recombinant nucleosomes. Parameters used for calculation of the  $K_d$  value of PEG-LANA-FITC **7** in cells and the concentration of nucleosomes or acidic patches were shown in the table. See “Estimation of in-cell  $K_d$  of PEG-LANA-FITC” section for details.



| Yield (%)  | <b>11+ 3+</b>       | <b>11- 3+</b>      | <b>11- 3-</b>      |
|------------|---------------------|--------------------|--------------------|
| H2A K5     | 0.55 ( $\pm$ 0.06)  | 0.46 ( $\pm$ 0.02) | N.D.               |
| H2A K9     | 0.77 ( $\pm$ 0.14)  | 0.23 ( $\pm$ 0.02) | N.D.               |
| H2B K116   | 10.39 ( $\pm$ 0.63) | 1.16 ( $\pm$ 0.25) | N.D.               |
| H2B K120   | 81.01 ( $\pm$ 1.28) | N.D.               | N.D.               |
| H2B K125   | 4.94 ( $\pm$ 2.18)  | 1.98 ( $\pm$ 0.16) | N.D.               |
| H3 K9      | 1.04 ( $\pm$ 0.11)  | 0.73 ( $\pm$ 0.06) | 1.00 ( $\pm$ 0.50) |
| H3 K14     | 1.05 ( $\pm$ 0.18)  | 0.77 ( $\pm$ 0.06) | 0.50 ( $\pm$ 0.01) |
| H3 K18     | 0.86 ( $\pm$ 0.41)  | 0.82 ( $\pm$ 0.01) | N.D.               |
| H3 K23     | 1.09 ( $\pm$ 0.50)  | 1.02 ( $\pm$ 0.09) | 0.39 ( $\pm$ 0.05) |
| H3 K27Ac   | 0.91 ( $\pm$ 0.33)  | 0.84 ( $\pm$ 0.01) | N.D.               |
| H3 K36Ac   | 0.55 ( $\pm$ 0.52)  | N.D.               | N.D.               |
| H3 K37Ac   | 0.54 ( $\pm$ 0.16)  | 0.57 ( $\pm$ 0.03) | N.D.               |
| H4 K5      | 1.18 ( $\pm$ 1.17)  | 1.61 ( $\pm$ 0.01) | N.D.               |
| H4 K8      | N.D.                | 0.70 ( $\pm$ 0.47) | N.D.               |
| H4 K12     | 1.13 ( $\pm$ 0.16)  | 1.15 ( $\pm$ 0.59) | N.D.               |
| H4 K16     | 2.56 ( $\pm$ 0.24)  | 2.36 ( $\pm$ 0.17) | 0.25 ( $\pm$ 0.15) |
| eDHFR K32  | 5.83 ( $\pm$ 2.31)  | 4.37 ( $\pm$ 0.84) | N.D.               |
| eDHFR K38  | 2.65 ( $\pm$ 0.97)  | 0.73 ( $\pm$ 0.22) | 0.32 ( $\pm$ 0.24) |
| eDHFR K58  | 3.84 ( $\pm$ 1.10)  | 2.02 ( $\pm$ 0.58) | N.D.               |
| eDHFR K76  | N.D.                | N.D.               | N.D.               |
| eDHFR K106 | N.D.                | N.D.               | N.D.               |
| eDHFR K109 | N.D.                | N.D.               | N.D.               |

**Figure S4.** Regioselective histone acetylation in recombinant nucleosomes by PEG-LANA-DSSMe catalyst. LC-MS/MS analysis of acetylation yield of each lysine residue on nucleosomes (33 ng DNA/ $\mu$ L, 0.37  $\mu$ M) and eDHFR-GFP (1  $\mu$ M) treated with TCEP (0.1 mM), with or without **11** (10  $\mu$ M) and **3** (30 mM) were shown. The average and error range are indicated (n = 2 independent experiments). N.D. not detected in either or both experiments.

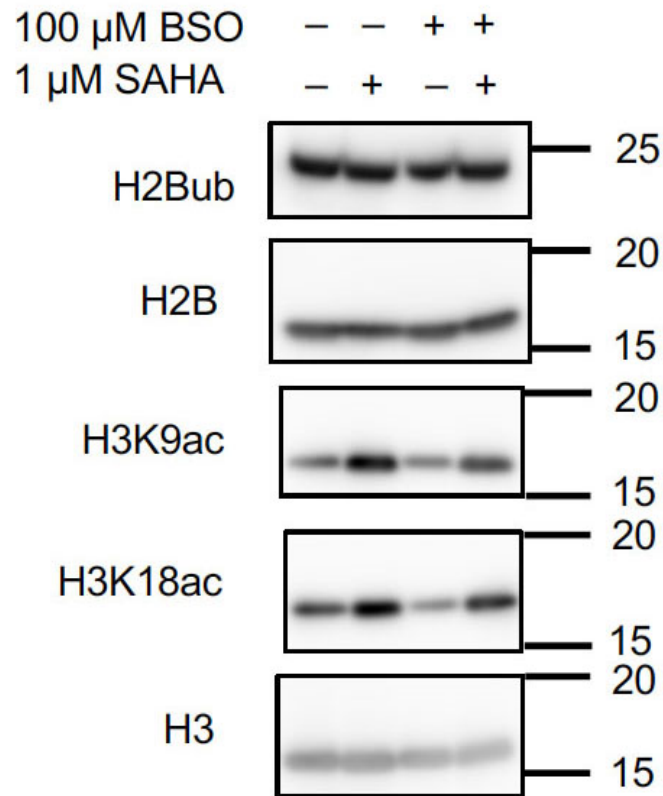

**Figure S5.** Analyses of histone acetylation and ubiquitination in BSO- or HDAC inhibitor-treated cells. HeLa S3 cells pretreated with or without BSO (100  $\mu$ M) for 24 h were incubated with or without SAHA (1  $\mu$ M) and BSO (100  $\mu$ M) in DMEM at 37  $^{\circ}$ C for 6 h. The level of H2BK120ac, H2BK120ub (H2Bub), and H3-tail acetylation (H3K9ac and H3K18ac) were examined by immunoblotting.

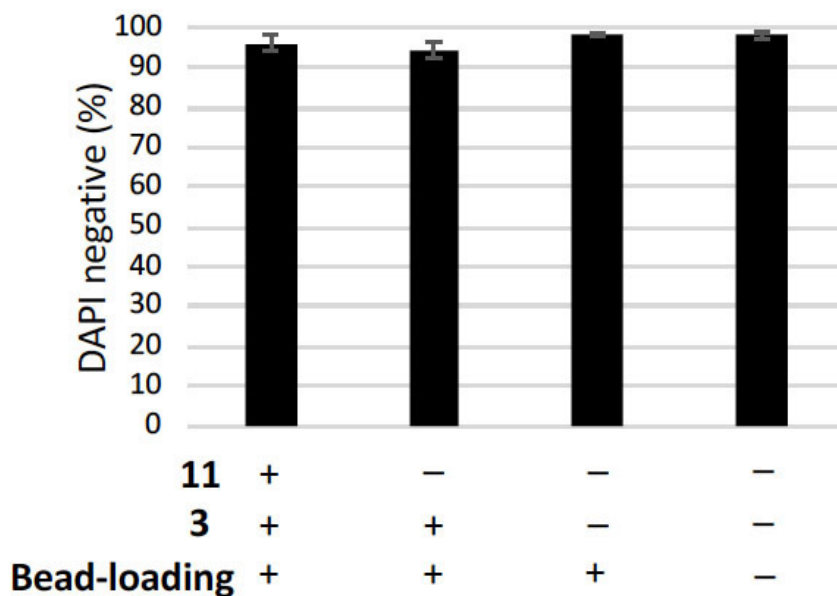

**Figure S6.** Examination of cell viability in in-cell reaction. The percentage of DAPI negative cells in Figure 3E were shown. The average and error range (bars) are indicated (n = 2 independent experiments).

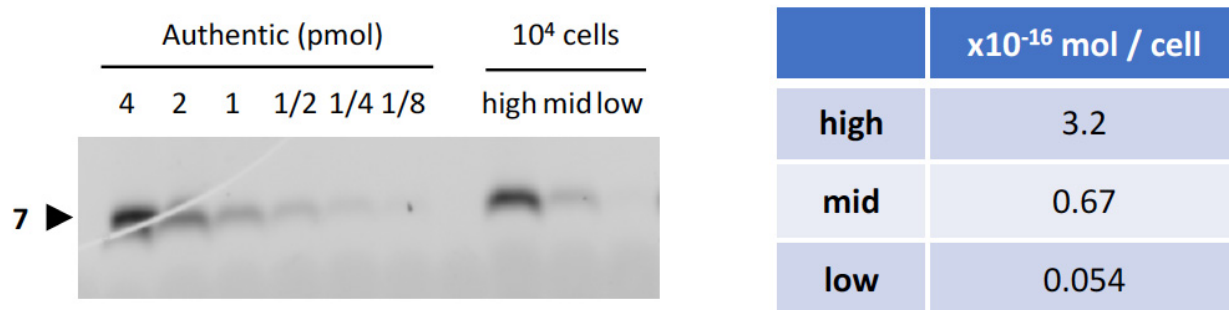

**Figure S7.** Estimation of concentration of **7** in cells in the three fractions (“high”, “mid”, and “low”) sorted by flow cytometry. SDS-PAGE image of PEG<sub>550</sub>-LANA-FITC **7** was shown. **7** recovered from 10<sup>4</sup> cells of “high”, “mid”, or “low” fraction was loaded. As reference, the indicated amount of **7** was loaded (Authentic). The amount of **7** in each fraction was calculated by calibration curve of authentic compounds.

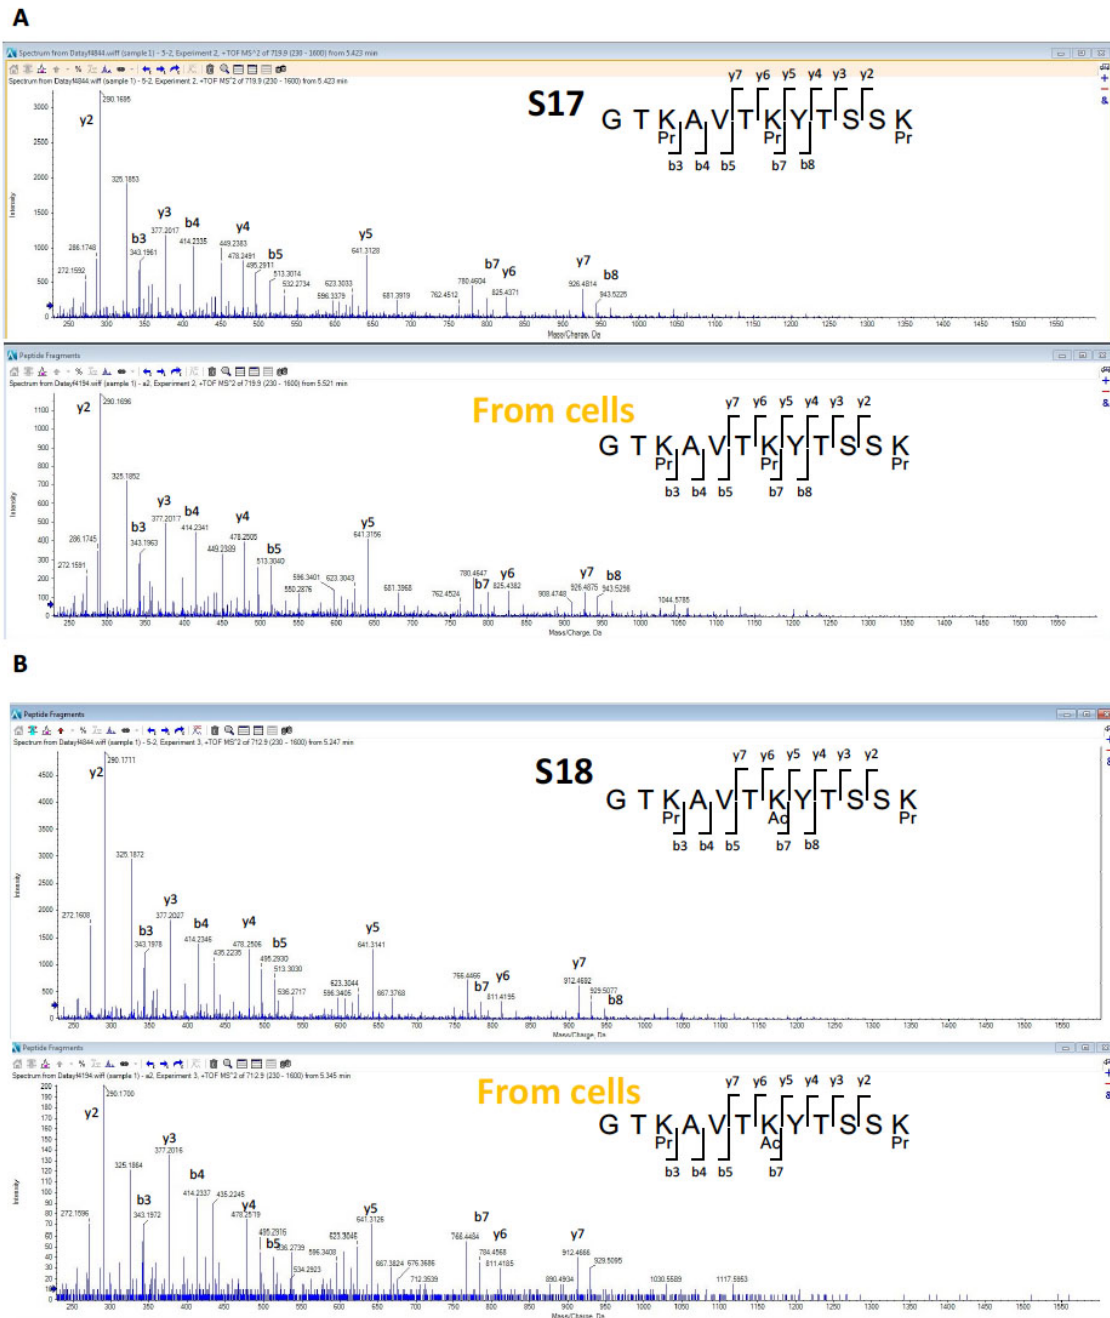

**Figure S8.** Characterization of H2B G114-K125 peptides identified by LC-MS/MS. LC-MS/MS spectra of the doubly charged, (A) H2BK120-propionylated peptides and (B) H2BK120-acetylated peptides were shown. It is noted that unmodified lysines were propionylated before LC-MS/MS analysis. Upper panel shows LC-MS/MS spectra of synthesized authentic peptide **S17** or **S18** (2  $\mu$ M). Lower panel shows LC-MS/MS spectra of peptides recovered from cells after in-cell reaction.

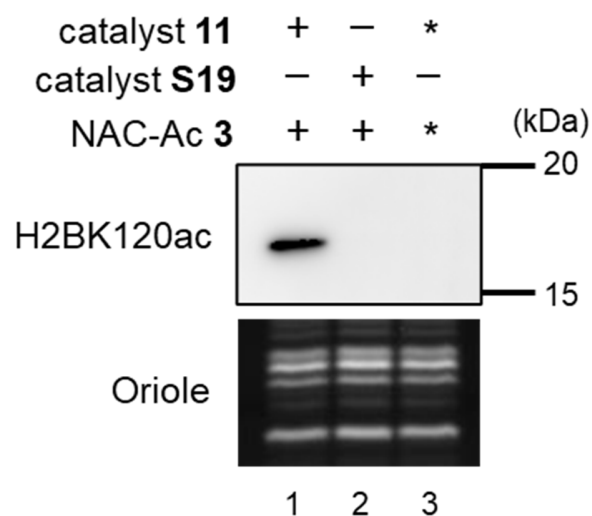

**Figure S9.** Additional data for the acetylation reaction by PEG-LANA-DSH in living cells. HeLa S3 cells pretreated with BSO (100  $\mu$ M) were loaded with **11** or **S19** (500  $\mu$ M), TCEP (2 mM), Dextran-Rhodamine (0.5 mg/mL), and **3** (30 mM), and incubated with growth medium containing **3** (30 mM) at 37  $^{\circ}$ C for 8 h. After sorting living cells by flow cytometry, histones were extracted by acid extraction. For lane 3 (\*), two populations of cells were prepared. In one population, HeLa S3 cells pretreated with BSO (100  $\mu$ M) were loaded with **11** (500  $\mu$ M), TCEP (2 mM), and Dextran-Rhodamine (0.5 mg/mL), and incubated with growth medium at 37  $^{\circ}$ C for 8 h. In the other population, HeLa S3 cells pretreated with BSO (100  $\mu$ M) were loaded with **3** (30 mM), TCEP (2 mM), and Dextran-Rhodamine (0.5 mg/mL), and incubated with growth medium containing **3** (30 mM) at 37  $^{\circ}$ C for 8 h. After sorting living cells separately, two populations were mixed and histones were extracted. The level of H2BK120ac was examined by immunoblotting. Protein amount is indicated by Oriole staining. Representative data of two independent experiments are shown.

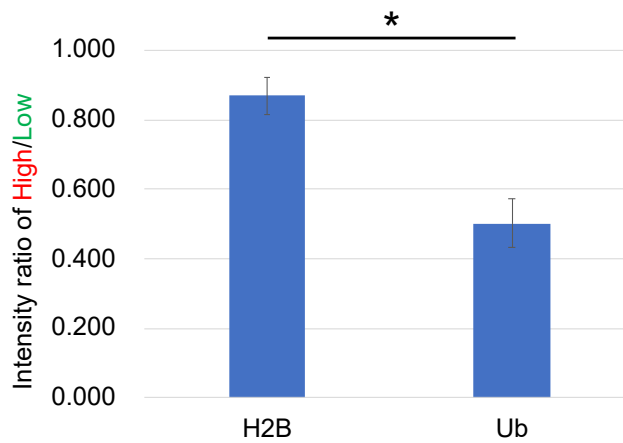

**Figure S10.** Additional data for Figure 4C.

The western blot data of H2B and H2BK120 ubiquitination in “High” or “Low” cell fraction obtained through sorting by flow cytometry was quantified by Fiji/ImageJ ver. 1.51h. The average intensity ratios of “High”/“Low” were shown. Error bars indicate SE (n=4 western blot data for two independent experiments). The asterisk indicates significant values for the two-tailed Student’s t test: \*p<0.05.

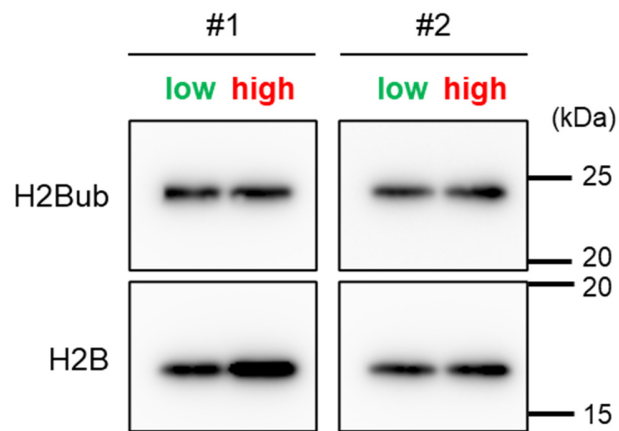

**Figure S11.** Effect of synthetic histone acetylation by PEG-LANA-DSH on H2B ubiquitination after 18 h of the reaction. HeLa S3 cells pretreated with BSO (100  $\mu$ M) were loaded with **11** (500  $\mu$ M), TCEP (2 mM), Dextran-Rhodamine (0.5 mg/mL), and **3** (30 mM), incubated with growth medium containing **3** (30 mM) at 37  $^{\circ}$ C for 8 h and further incubated with growth medium in the absence of catalysts and donors at 37  $^{\circ}$ C for 18 h. Acid-extracted histones from “high” or “low” cell fraction were analyzed by western blotting. Levels of H2BK120 ubiquitination and H2B in H2BK120-acetylated (high) or non-acetylated (low) cells were shown. Data from two independent experiments (#1 and #2) are shown. Decrease of H2B ubiquitination was not clearly observed in these cases, suggesting that turnover of H2B ubiquitination may not be sufficient for 18-h incubation. Note that we observed significant decrease of H2B ubiquitination after 36-h incubation (Figure 4C and S10).



**Table S1.** Targeted precursor ions and collision energies for H2BK120 containing peptides.

| Peptide               | Sequence         | Precursor ion (m/z) | fragment ions                                                        | collision energy (V) | retention time (min) |
|-----------------------|------------------|---------------------|----------------------------------------------------------------------|----------------------|----------------------|
| H2B 114-125 (rNuc)    | GTKAVT<br>KYTSAK | 711.90 (3Pr)        | b <sub>3</sub> , b <sub>4</sub> , b <sub>5</sub> ,<br>b <sub>6</sub> | 35                   | 6.1-6.2              |
|                       |                  | 704.89 (1Ac 2Pr)    |                                                                      | 35                   | 6.0-6.1              |
|                       |                  | 697.88 (2Ac 1Pr)    | y <sub>2</sub> , y <sub>3</sub> , y <sub>4</sub> , y <sub>5</sub>    | 35                   | 6.0-6.1              |
| H2B 114-125 (in-cell) | GTKAVT<br>KYTSSK | 719.89 (3Pr)        | b <sub>3</sub> , b <sub>4</sub> , b <sub>5</sub> ,<br>b <sub>6</sub> | 40                   | 5.4-5.7              |
|                       |                  | 712.89 (1Ac 2Pr)    |                                                                      | 40                   | 5.2-5.5              |
|                       |                  | 705.88 (2Ac 1Pr)    | y <sub>2</sub> , y <sub>3</sub> , y <sub>4</sub> , y <sub>5</sub>    | 40                   | 4.7-4.9              |

**Table S2.** Targeted precursor ions and collision energies of eDHFR-GFP.

| Peptide | Sequence              | Precursor ion (m/z) | fragment ions                                                           | collision energy (V) | retention time (min) |
|---------|-----------------------|---------------------|-------------------------------------------------------------------------|----------------------|----------------------|
| 18-33   | NAMPWNLPA<br>DLAWFKR  | 993.51 (Pr)         | b <sub>7</sub> , y <sub>9</sub> , y <sub>13</sub> , y <sub>14</sub>     | 43                   | 8.2-8.4              |
|         |                       | 986.50 (Ac)         |                                                                         | 43                   | 8.1-8.3              |
| 34-44   | NTLNKPVIMG<br>R       | 649.87 (Pr)         | y <sub>6</sub> , y <sub>7</sub> , y <sub>8</sub> , y <sub>9</sub>       | 43                   | 5.9-6.0              |
|         |                       | 642.86 (Ac)         |                                                                         | 43                   | 5.8-5.9              |
| 58-71   | KNIILSSQPGT<br>DDR    | 800.42 (Pr)         | b <sub>3</sub> , y <sub>6</sub> , y <sub>9</sub> , y <sub>10</sub>      | 43                   | 5.7-5.9              |
|         |                       | 793.41 (Ac)         |                                                                         | 43                   | 5.6-5.8              |
| 72-80   | VTWVKSVD E            | 1118.57 (Pr)        | b <sub>5</sub> , b <sub>7</sub> , b <sub>8</sub> , y <sub>5</sub>       | 43                   | 6.3-6.6              |
|         |                       | 1104.56 (Ac)        |                                                                         | 43                   | n.d.                 |
| 102-118 | QFLPKAQKLY<br>LTHIDAE | 1064.08 (2Pr)       | b <sub>6</sub> , y <sub>10</sub> , y <sub>11</sub> ,<br>y <sub>12</sub> | 43                   | 7.3-7.4              |
|         |                       | 1057.07 (1Ac 1Pr)   |                                                                         | 43                   | n.d.                 |

n.d. not detected.

## Experimental procedures

### General

NMR spectra were recorded on JEOL ECX500 spectrometer, operating at 500 MHz for  $^1\text{H}$  NMR and 124.51 MHz for  $^{13}\text{C}$  NMR, or JEOL ECS400 spectrometer, operating at 400 MHz for  $^1\text{H}$  NMR and 100 MHz for  $^{13}\text{C}$  NMR. Chemical shifts were reported in ppm on the  $\delta$  scale relative to residual  $\text{CHCl}_3$  ( $\delta = 7.24$  for  $^1\text{H}$  NMR and  $\delta = 77.0$  for  $^{13}\text{C}$  NMR), Acetone- $d_6$  ( $\delta = 2.04$  for  $^1\text{H}$  NMR and  $\delta = 29.8$  for  $^{13}\text{C}$  NMR), DMSO- $d_6$  ( $\delta = 2.49$  for  $^1\text{H}$  NMR and  $\delta = 39.5$  for  $^{13}\text{C}$  NMR) as an internal reference, respectively. Gel permeation chromatographies (GPC) were performed with JAI LC-920 NEXT. Preparative HPLC was conducted by using a JASCO HPLC system equipped with a UV-2075 spectrometer, PU-4086 pumps, a DG-4580 degasser, an MX-2080-32 mixer. Analytical HPLC was conducted by using a JASCO HPLC system equipped with a UV-2075 spectrometer, PU-4180 pumps, a DG-4580 degasser, and an MX-2080-32 mixer. ESI-MS spectra were measured on Agilent Technologies 6120 (for LRMS) or Bruker micrOTOF II spectrometer (for HRMS). MALDI-TOFMS was obtained with a Shimadzu Biotech Axima ToF<sup>2</sup> spectrometer. LC-MS/MS analyses were conducted using AB Sciex Triple TOF 4600 equipped with Eksigent ekspert microLC 200, and data analysis was carried out on PeakView software (AB Sciex, version 1.2.0.3).

### Materials

Poly(ethylene glycol) methyl ethers ( $M_n = 550, 750, \text{ and } 2000$ ) were purchased from Sigma-Aldrich (#202487, 202495, and 202509, respectively). All protected  $\alpha$ -amino acids were purchased from Watanabe Chemical Industries, Ltd. (Hiroshima, Japan) and Peptide Institute, Inc. (Osaka, Japan). NovaPEG Rink amide AM resin was purchased from Merck KGaA, Co. Thin layer chromatography (TLC) was performed on Merck Kieselgel 60 F254 (0.25 mm) plates. Column chromatography was performed with Kanto silica gel 60 (40-50 mesh). Other chemicals were used as received from commercial sources, unless otherwise stated.

### Analytical HPLC

Analytical HPLC was performed using YMC-Triart C18 or YMC-Triart Phenyl (4.6 mm I.D. x 150 mm) column at 40 °C with a gradient of acetonitrile in 0.1% aqueous TFA listed below at a flow rate of 1 mL/min.

Method A: YMC-Triart C18, 4.6 mm I.D. x 150 mm, linear gradient of 2-90% acetonitrile in 0.1% aqueous TFA over 3-15 min (UV: 254 nm)

Method B: YMC-Triart C18, 4.6 mm I.D. x 150 mm, linear gradient of 0-60% acetonitrile in 0.1% aqueous TFA over 5-25 min (UV: 254 nm)

Method C: YMC-Triart Phenyl C18, 4.6 mm I.D. x 150 mm, linear gradient of 2-90% acetonitrile in 0.1% aqueous TFA over 3-15 min (UV: 254 nm)

Method D: YMC-Triart Phenyl C18, 4.6 mm I.D. x 150 mm, linear gradient of 2-90% acetonitrile in 0.1% aqueous TFA over 3-15 min (UV: 230 nm)

### **Preparative HPLC**

Preparative HPLC was performed using YMC-Triart C18 or YMC-Pack ODS-AM (20 mm I.D. x 250 mm or 10 mm I.D. x 250 mm) column at 40 °C with a gradient of acetonitrile in 0.1% aqueous TFA listed below at a flow rate of 10 or 3 mL/min.

Method a: 2% acetonitrile for 3 min, followed by a linear gradient of 2–100% acetonitrile over 47 min with a flow rate of 3 mL/min. YMC-Triart C18, 230 nm.

Method b: 2% acetonitrile for 3 min, followed by a linear gradient of 2–100% acetonitrile over 47 min with a flow rate of 10 mL/min. YMC-Triart C18, 230 nm.

Method c: 25% acetonitrile for 5 min, followed by a linear gradient of 25–100% acetonitrile over 45 min with a flow rate of 10 mL/min. YMC-Triart C18, 254 nm.

Method d: 50% acetonitrile for 5 min, followed by a linear gradient of 50-100% acetonitrile over 30 min with a flow rate of 3 mL/min. YMC-Triart C18, 254 nm.

Method e: 25% acetonitrile for 5 min, followed by a linear gradient of 25-100% acetonitrile over 40 min with a flow rate of 3 mL/min. YMC-Triart C18, 254 nm.

Method f: 25% acetonitrile for 5 min, followed by a linear gradient of 25-100% acetonitrile over 30 min with a flow rate of 3 mL/min. YMC-Triart C18, 254 nm.

Method g: 0% acetonitrile for 5 min, followed by a linear gradient of 0-60% acetonitrile over 50 min with a flow rate of 10 mL/min. YMC-Triart C18, 230 nm.

Method h: 0% acetonitrile for 5 min, followed by a linear gradient of 0-60% acetonitrile over 30 min with a flow rate of 10 mL/min. YMC-Triart C18, 254 nm.

Method i: 0% acetonitrile for 5 min, followed by a linear gradient of 0-60% acetonitrile over 50 min with a flow rate of 10 mL/min. YMC-Triart C18, 254 nm.

Method j; 0% acetonitrile for 5 min, followed by a linear gradient of 0-90% acetonitrile over 50 min with a flow rate of 10 mL/min. YMC-Triart C18, 254 nm.

Method k; 0% acetonitrile for 5 min, followed by a linear gradient of 0-60% acetonitrile over 40 min with a flow rate of 10 mL/min. YMC-Triart C18, 254 nm.

Method l; 10% acetonitrile for 10 min, followed by a linear gradient of 10-90% acetonitrile over 50 min with a flow rate of 10 mL/min. YMC-Triart C18, 230 nm.

## Synthesis

### *N*<sup>2</sup>-(((9*H*-Fluoren-9-yl)methoxy)carbonyl)-*N*<sup>6</sup>-(2-azidoacetyl)-*L*-lysine (**S1**)

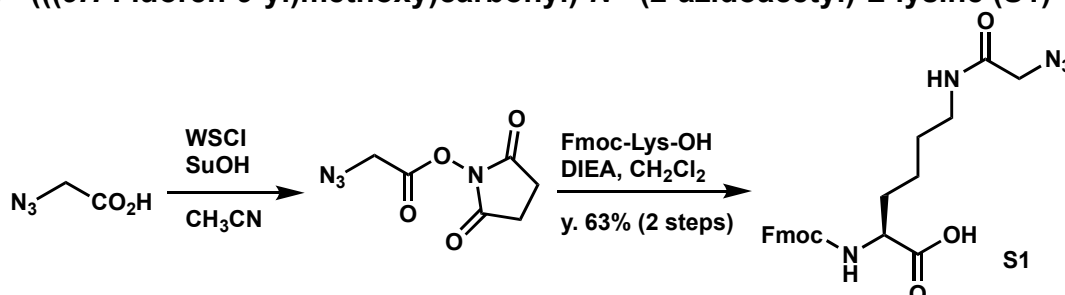

To a stirred solution of 2-azidoacetic acid (810  $\mu$ L, 10.8 mmol) and *N*-hydroxysuccinimide (702 mg, 6.10 mmol) in acetonitrile (7.2 mL), WSCI·HCl (1.41 g, 7.35 mmol) was added at r.t., and the mixture was stirred for 3.5 h. After evaporation of acetonitrile, the residue was dissolved in 72 mL of CH<sub>2</sub>Cl<sub>2</sub>. To the solution, Fmoc-Lys-OH·AcOEt (3.00 g, 7.41 mmol) and *N,N*-diisopropylethylamine (3.81 mL, 28.2 mmol) were added at r.t. The mixture was stirred for 19 h, and 1 M HCl aq. was added. The mixture was extracted with CH<sub>2</sub>Cl<sub>2</sub>, and combined organic layers were concentrated. Purification with silica gel column chromatography (CH<sub>2</sub>Cl<sub>2</sub>/MeOH = 10/1) afforded **S1** (2.10 g, 4.65 mmol, y. 63%) as yellow solids. <sup>1</sup>H NMR (DMSO-*d*<sub>6</sub>, 400 MHz)  $\delta$  = 8.10 (brt, *J* = 5.5 Hz, 1H), 7.88 (d, *J* = 7.6 Hz, 2H), 7.72 (d, *J* = 7.6 Hz, 2H), 7.63 (d, *J* = 8.2 Hz, 1H), 7.41 (dd, *J* = 7.6 Hz, 7.6 Hz, 2H), 7.32 (dd, *J* = 7.6 Hz, 7.6 Hz, 2H), 4.28 (d, *J* = 6.9 Hz, 2H), 4.22 (t, *J* = 6.9 Hz, 1H), 3.94-3.89 (m, 1H), 3.78 (s, 2H), 3.10-3.04 (m, 2H), 1.71-1.58 (m, 2H), 1.41-1.29 (m, 4H).

There is an unidentified singlet peak at 3.16 ppm.

<sup>13</sup>C NMR (DMSO-*d*<sub>6</sub>, 100 MHz)  $\delta$  = 174.1, 167.1, 156.2, 143.9, 140.8, 127.7, 127.1, 125.3, 120.2, 65.7, 53.8, 50.8, 48.7, 46.7, 30.4, 28.6, 23.1

ESI-HRMS: *m/z* Calcd for C<sub>23</sub>H<sub>25</sub>N<sub>5</sub>NaO<sub>5</sub> [M+Na]<sup>+</sup>: 474.1748, Found: 474.1737.

### 3,4,5-Tris(2-(2-(2-methoxyethoxy)ethoxy)ethoxy)benzoic acid (**S2**)

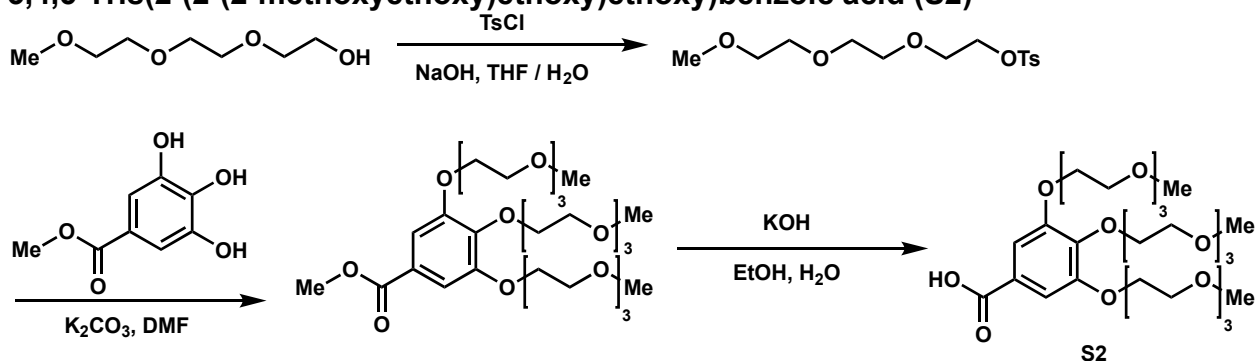

Carboxylic acid **S2** was synthesized as reported in the literature (1).



**(PEG<sub>2000</sub>)-4-methylbenzenesulfonate (S5)**

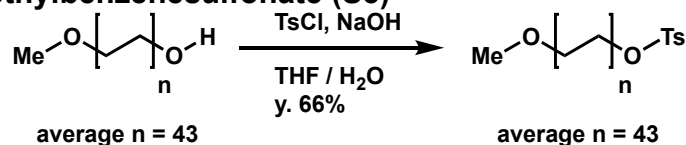

**S5**

Polyethylene glycol monomethyl ether (average Mn 2000, 1.0 g, 0.50 mmol) was dissolved in the mixture of 5 M NaOH aq. (10 mL) and THF (10 mL). To the reaction mixture, *p*-toluenesulfonyl chloride (475 mg, 2.50 mmol) was added portion-wise at 4 °C. After reaction at r.t. for 18 h, 75 mL H<sub>2</sub>O was added, and aqueous layer was extracted with CH<sub>2</sub>Cl<sub>2</sub>. Combined organic layers were washed with brine, and dried over Na<sub>2</sub>SO<sub>4</sub>. The organic layer was concentrated. The residue was purified with silica gel column chromatography (CH<sub>2</sub>Cl<sub>2</sub>:MeOH = 1:0 to 12.5:1) to give **S5** (688 mg, 330 μmol, y. 66%) as white solid. <sup>1</sup>H NMR (CDCl<sub>3</sub>, 400 MHz) δ = 7.72, (d, *J* = 8.5 Hz, 2H), 7.28 (d, *J* = 8.5 Hz, 2H), 4.08 (t, *J* = 5.0 Hz, 2H), 3.76-3.38 (m, 170H), 3.30 (s, 3H), 2.38 (s, 3H).

<sup>13</sup>C NMR (CDCl<sub>3</sub>, 125 MHz) δ = 144.2, 132.5, 129.3, 127.4, 71.3, 70.1, 70.0, 69.9, 68.8, 68.1, 58.4, 21.1.

Based on the integration of the glycol protons, the average length of the PEG chain was n = 43.

MALDI-TOFMS spectrum of the product is shown below.

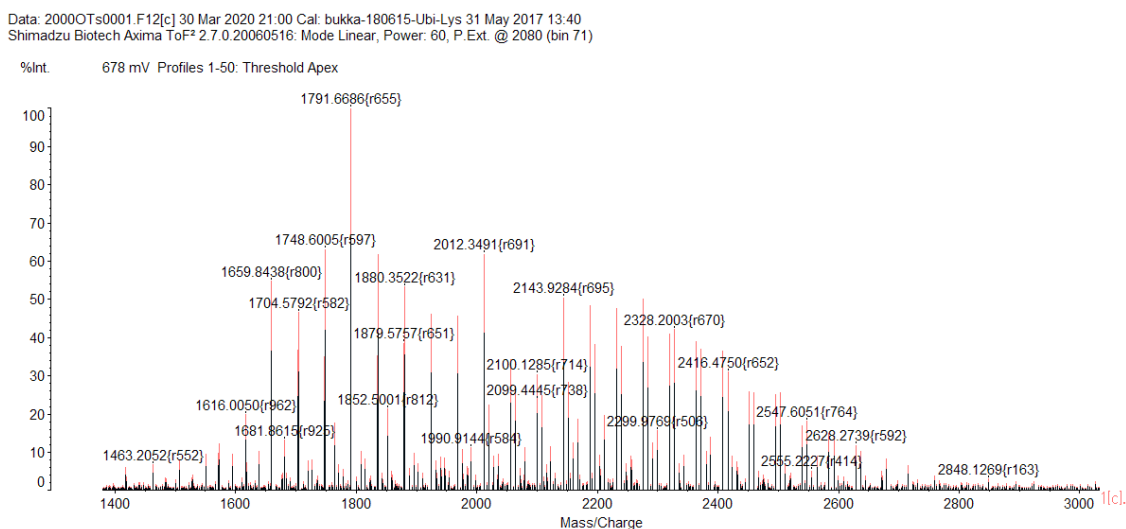

One of the peaks of the highest intensity has *m/z* of 2012.3, which corresponds to n = 41 (C<sub>90</sub>H<sub>174</sub>NaO<sub>44</sub>S [M+Na]<sup>+</sup>: 2014.1).

### 3,4,5-Tris(PEG<sub>550</sub>)-benzoic acid (**S6**)

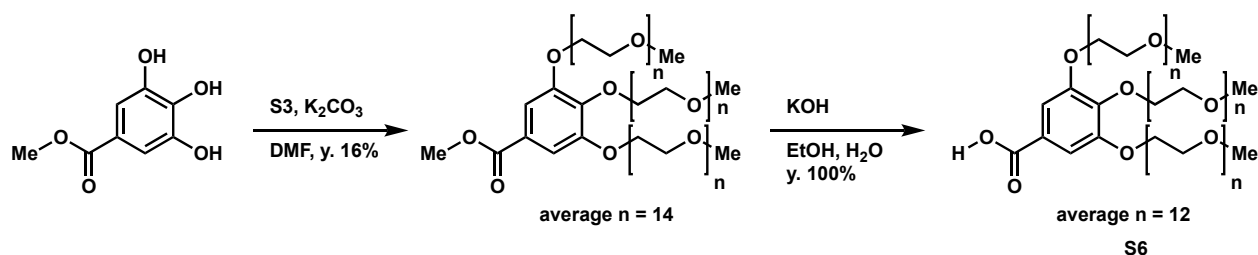

Methyl gallate (180 mg, 0.978 mmol) and **S3** (3.03 g, 4.00 mmol) were dissolved in DMF (30 mL), and  $K_2CO_3$  (1.40 g, 10.1 mmol) was added. The mixture was stirred at 80 °C for 16 h, and the reaction mixture was filtered through Celite after cooling to room temperature. Water was added to the filtrate, and the aqueous layer was extracted with  $CH_2Cl_2$ . Combined organic layers were concentrated. Purification with silica gel column chromatography ( $CH_2Cl_2/MeOH = 40/1$ ), followed by GPC, gave **Tris(PEG550)-gallate methyl ester** (320 mg, 0.154 mmol, 16%) as yellow oil.  $^1H$  NMR (Acetone- $d_6$ , 400 MHz)  $\delta = 7.20$ , (s, 2H), 4.13-4.09 (m, 6H), 3.76-3.74 (m, 7H), 3.68-3.66 (m, 3H), 3.59-3.40 (m, 144H), 3.37-3.33 (m, 7H), 3.16 (s, 9H).

$^{13}C$  NMR (Acetone- $d_6$ , 125 MHz)  $\delta = 166.8, 153.4, 143.7, 125.7, 109.6, 73.2, 72.6, 71.5, 71.4, 71.3, 71.3, 71.2, 71.2, 71.0, 70.3, 69.9, 58.8, 52.3$ .

Based on the integration of the glycol protons, the average length of the PEG chain was  $n = 14$ .

MALDI-TOFMS spectrum of the product is shown below.

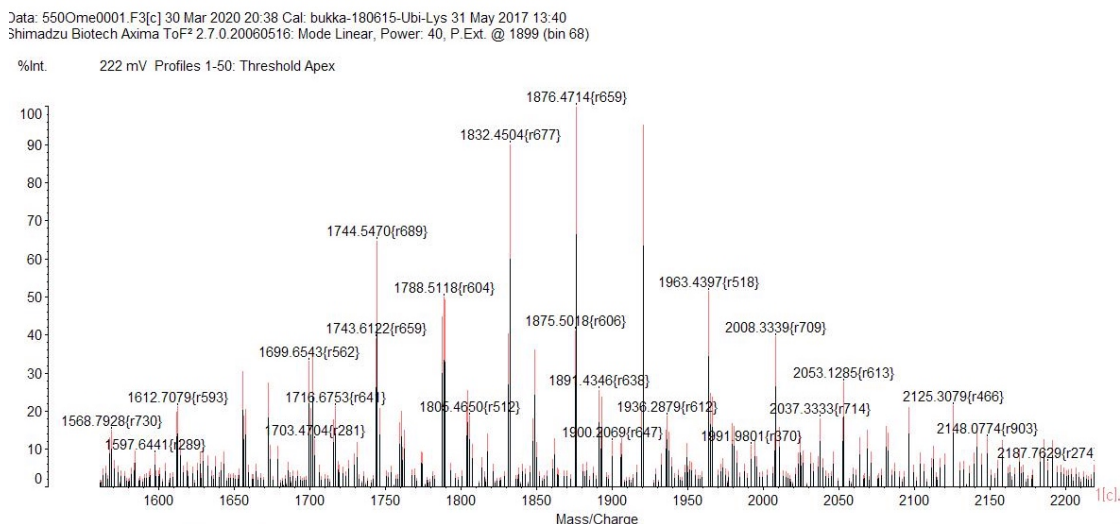

One of the peaks of the highest intensity has  $m/z$  of 1832.4, which corresponds to  $n = 12$  ( $C_{83}H_{158}NaO_{41} [M+Na]^+$ : 1834.0).

The ester was dissolved in EtOH (3 mL), and 1 M KOH aq. (320  $\mu$ L, 0.320 mmol) was added. The mixture was stirred at 80 °C for 15 h, and 1 M HCl aq. was added until the pH became 2. All the volatiles were removed under reduced pressure. The residue was extracted with  $CH_2Cl_2$ , and concentrated to afford **S6** (276 mg, 153





$^{13}\text{C}$  NMR (Acetone- $d_6$ , 125 MHz)  $\delta$  = 166.8, 153.4, 143.7, 125.7, 109.6, 73.2, 72.6, 71.4, 71.4, 71.3, 71.3, 71.3, 71.2, 71.0, 70.3, 69.9, 58.8, 52.4.

Based on the integration of the glycol protons, the average length of the PEG chain was  $n = 19$ .

MALDI-TOFMS spectrum of the product is shown below.

data: 750OME0001.F8[c] 30 Mar 2020 20:53 Cal: bukka-180615-Ubi-Lys 31 May 2017 13:40  
Shimadzu Biotech Axima ToF $^2$  2.7.0.20060516. Mode Linear, Power: 60, P.Ext. @ 2208 (bin 73)

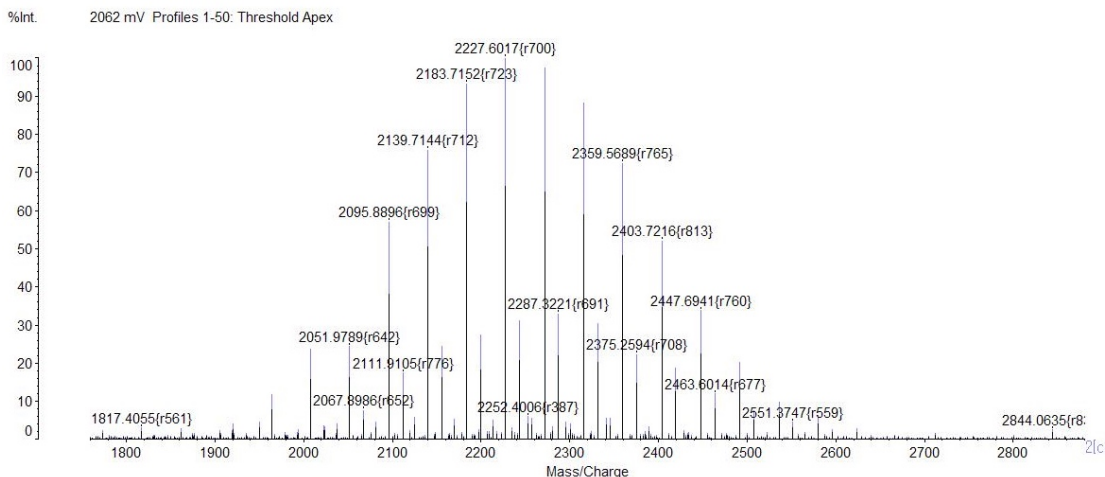

The peak of the highest intensity has  $m/z$  of 2227.6, which corresponds to  $n = 15$  ( $\text{C}_{101}\text{H}_{194}\text{NaO}_{50}$   $[\text{M}+\text{Na}]^+$ : 2231.2).

The ester (343 mg, 0.125 mmol) was dissolved in EtOH (3 mL), and 1 M KOH aq. (250  $\mu\text{L}$ , 0.250 mmol) was added. After the mixture was stirred at r.t. for 7 h, 1 M HCl aq was added until the pH became 1. All the volatiles were removed under reduced pressure. The residue was extracted by  $\text{CH}_2\text{Cl}_2$ , and concentrated to afford **S7** (247 mg, 86.5  $\mu\text{mol}$ , y. 69%).  $^1\text{H}$  NMR (Acetone- $d_6$ , 500 MHz)  $\delta$  = 7.22 (s, 2H), 4.13-4.09 (m, 6H), 3.75 (t,  $J = 4.6$  Hz, 4H), 3.67 (t,  $J = 5.2$  Hz, 2H), 3.58-3.39 (m, 214H), 3.35-3.33 (m, 6H), 3.16 (s, 9H).

$^{13}\text{C}$  NMR (Acetone- $d_6$ , 125 MHz)  $\delta$  = 167.1, 153.3, 143.4, 126.1, 109.7, 73.4, 73.1, 72.5, 71.4, 71.3, 71.2, 71.2, 71.2, 71.1, 71.0, 70.9, 70.2, 69.8, 61.8, 58.7.

MALDI-TOFMS  $m/z$  Calcd for  $\text{C}_{100}\text{H}_{192}\text{NaO}_{50}$  ( $n = 15$ )  $[\text{M}+\text{Na}]^+$ : 2216.2.

Based on the integration of the glycol protons, the average length of the PEG chain was  $n = 20$ .

MALDI-TOFMS spectrum of the product is shown below.

Data: 750Co2H0001.F9[c] 30 Mar 2020 20:54 Cal: bukka-180615-Ubi-Lys 31 May 2017 13:40  
Shimadzu Biotech Axima ToF<sup>2</sup> 2.7.0.20060516: Mode Linear, Power: 60, P.Ext. @ 2208 (bin 73)

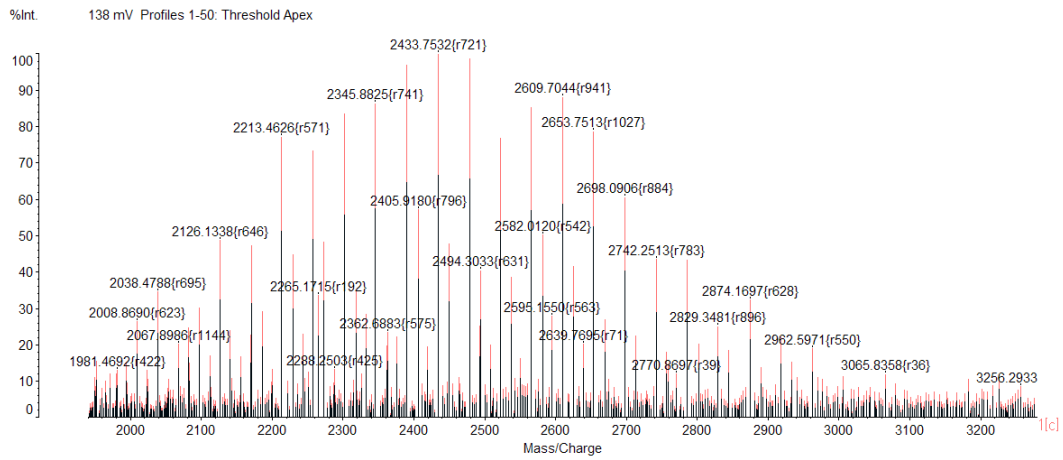

### Zoomed view

Data: 750Co2H0001.F9[c] 30 Mar 2020 20:54 Cal: bukka-180615-Ubi-Lys 31 May 2017 13:40  
Shimadzu Biotech Axima ToF<sup>2</sup> 2.7.0.20060516: Mode Linear, Power: 60, P.Ext. @ 2208 (bin 73)

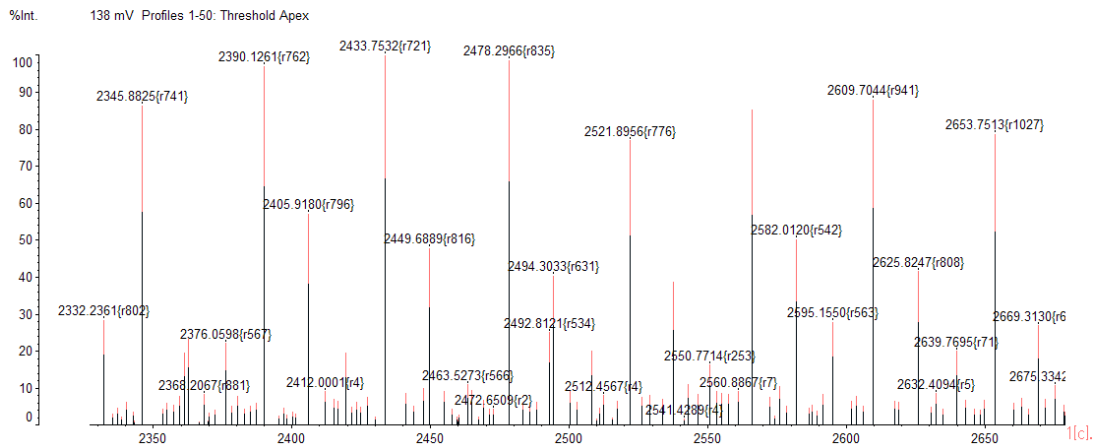

One of the peaks of the highest intensity has  $m/z$  of 2478.30 which corresponds to  $n = 17$  ( $C_{112}H_{216}NaO_{56} [M+Na]^+$ : 2481.4).

### 3,4,5-Tris(PEG2000)-benzoic acid (S8)

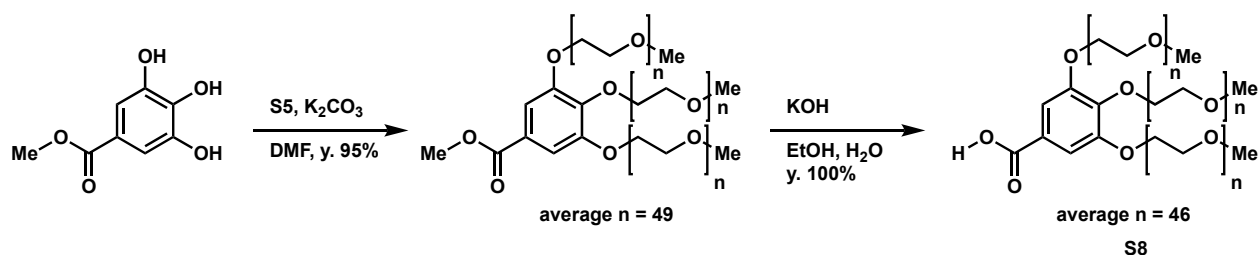

Methyl gallate (74 mg, 0.40 mmol) and **S5** (3.50 g, 1.68 mmol) were dissolved in DMF (12 mL), and  $\text{K}_2\text{CO}_3$  (556 mg, 4.03 mmol) was added. After the mixture was stirred at 80 °C for 58 h, the reaction mixture was filtered through Celite. Water was added to the filtrate. The aqueous layer was extracted with  $\text{CH}_2\text{Cl}_2$ , and concentrated. Purification with silica gel column chromatography ( $\text{CH}_2\text{Cl}_2/\text{MeOH} = 30/1$  to  $3/1$ ) gave **Tris(PEG2000)-gallate methyl ester** (2.58 g, 0.38 mmol, y. 95%) as yellow solid.  $^1\text{H NMR}$  (Acetone- $d_6$ , 400 MHz)  $\delta = 7.21$  (s, 2H), 4.14-4.10 (m, 6H), 3.76-3.74 (m, 7H), 3.68-3.67 (m, 2H), 3.66-3.63 (m, 4H), 3.59-3.38 (m, 562H), 3.36-3.34 (m, 8H), 3.29-3.27 (m, 4H), 3.17 (s, 9H).

There is an unidentified singlet peak at 7.89 ppm.

$^{13}\text{C NMR}$  (Acetone- $d_6$ , 125 MHz)  $\delta = 166.8, 153.4, 143.6, 125.7, 109.5, 73.5, 73.2, 72.6, 71.8, 71.8, 71.7, 71.4, 71.4, 71.3, 71.2, 71.2, 71.2, 71.1, 71.0, 70.5, 70.5, 70.3, 69.9, 61.9, 58.7, 52.4$ .

Based on the integration of the glycol protons, the average length of the PEG chain was  $n = 49$ .

MALDI-TOFMS spectrum of the product is shown below.

data: 2000OMe0001.F13[c] 30 Mar 2020 21:01 Cal: bukka-180615-Ubi-Lys 31 May 2017 13:40  
 shimadzu Biotech Axima ToF2 2.7.0.20060516: Mode Linear, Power: 60, P.Ext. @ 2080 (bin 71)

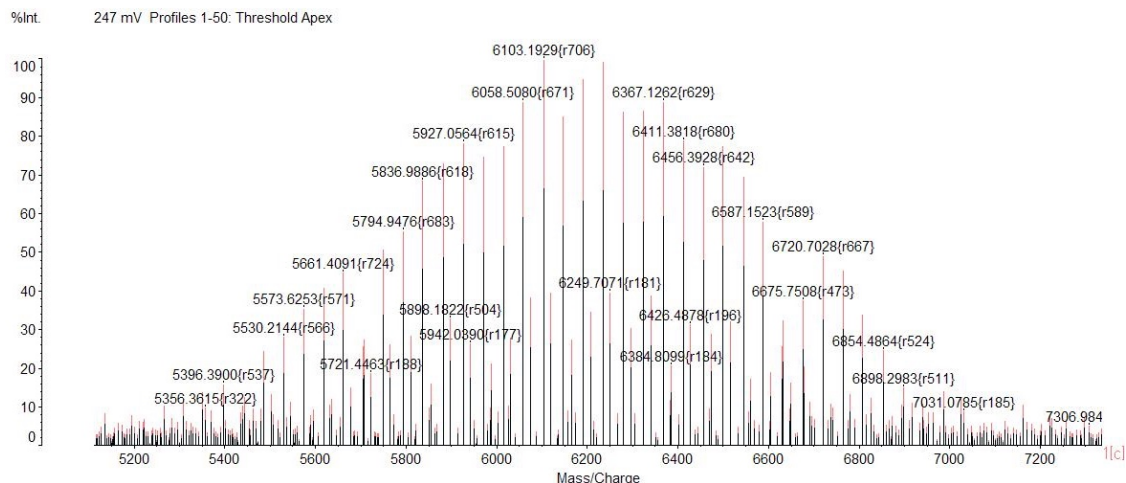

One of the peaks of the highest intensity has  $m/z$  of 6058.5, which corresponds to  $n = 44$  ( $\text{C}_{275}\text{H}_{542}\text{NaO}_{137} [\text{M}+\text{Na}]^+$ : 6062.5).

The ester (1.5 g, 0.22 mmol) was dissolved in EtOH (6.6 mL), and 1 M KOH aq. (440  $\mu\text{L}$ , 0.440 mmol) was added. After the mixture was stirred at 80 °C for 7 h, 1 M HCl aq was added until the pH became 1. All the volatiles were removed under

reduced pressure. The residue was extracted by  $\text{CH}_2\text{Cl}_2$ , and concentrated to afford **S8** (1.36 g, 0.22 mmol, y. 100%).  $^1\text{H}$  NMR (Acetone- $d_6$ , 400 MHz)  $\delta$  = 7.23 (s, 2H), 4.13–4.10 (m, 6H), 3.75 (t,  $J$  = 4.6 Hz, 4H), 3.68 (t,  $J$  = 5.5 Hz, 2H), 3.65–3.42 (m, 533H), 3.36–3.33 (m, 6H), 3.28 (t,  $J$  = 5.5 Hz, 2H), 3.17 (s, 9H).

$^{13}\text{C}$  NMR (Acetone- $d_6$ , 125 MHz)  $\delta$  = 167.1, 153.3, 143.4, 126.1, 109.7, 73.4, 73.2, 72.6, 72.5, 71.8, 71.8, 71.6, 71.4, 71.3, 71.2, 71.2, 71.1, 71.0, 70.9, 70.5, 70.5, 70.3, 69.8, 61.8, 58.7.

Based on the integration of the glycol protons, the average length of the PEG chain was  $n = 46$ .

MALDI-TOFMS spectrum of the product is shown below.

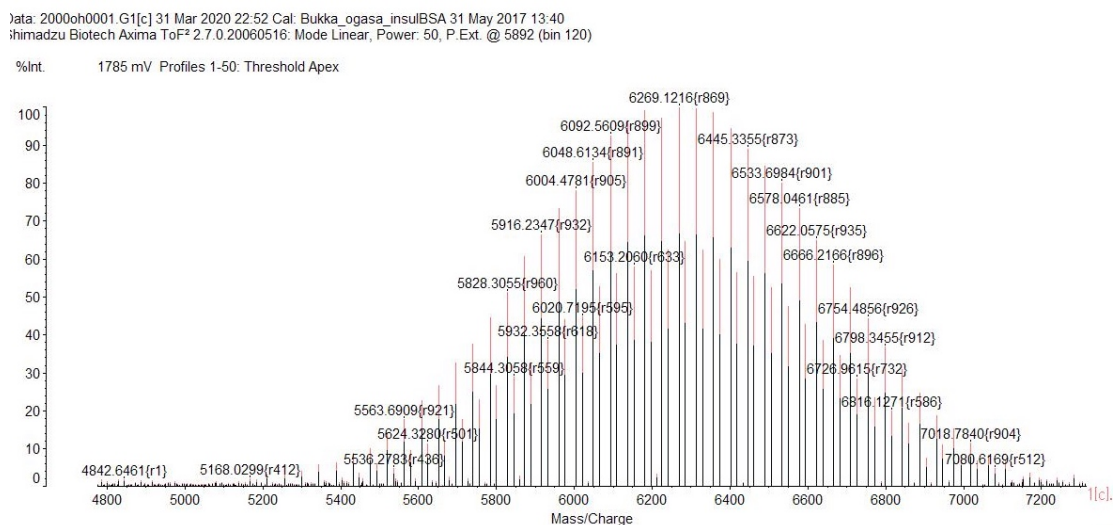

### Zoomed view

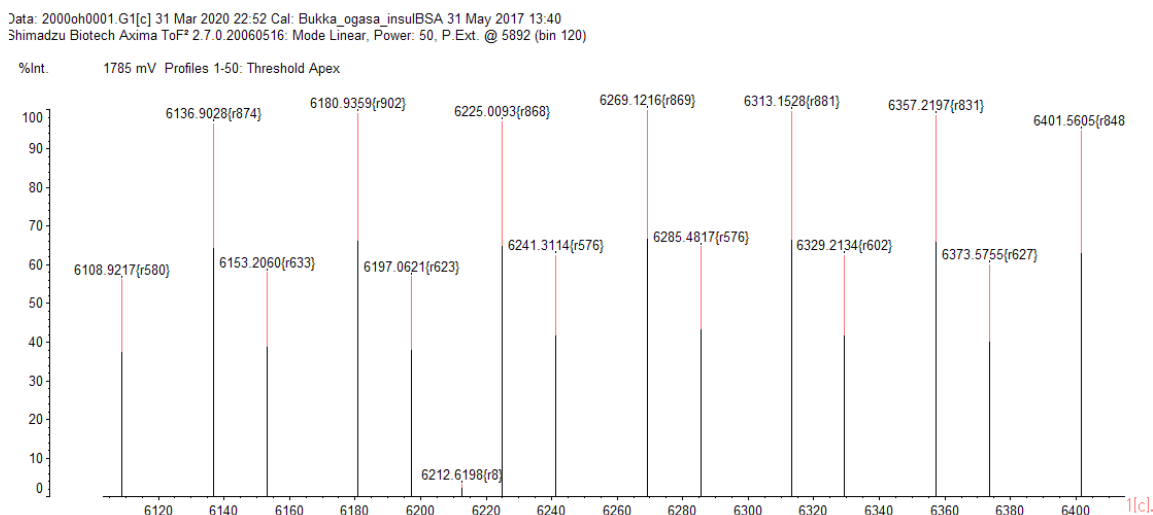

One of the peak of the highest intensity has  $m/z$  of 6313.15, which corresponds to  $n = 46$  ( $\text{C}_{286}\text{H}_{564}\text{NaO}_{143}$  [ $\text{M}+\text{Na}$ ]<sup>+</sup>: 6312.6).

### 3,4,5-Tris(PEG150)-*N*-(prop-2-yn-1-yl)benzamide (**S9**)

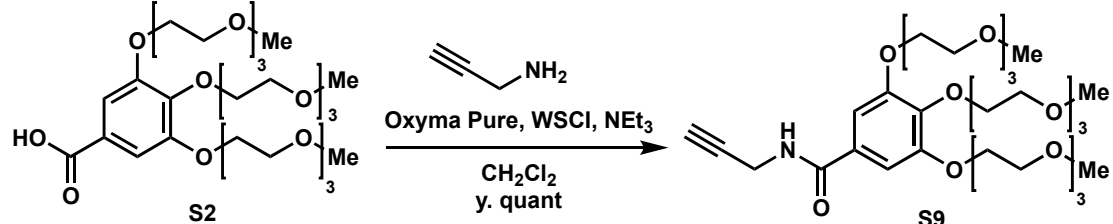

Propargyl amine (11 mg, 0.20 mmol), **S2** (60.0 mg, 98.6  $\mu\text{mol}$ ), Oxyma Pure (7.10 mg, 50.0  $\mu\text{mol}$ ) and WSCI-HCl (38.0 mg, 198  $\mu\text{mol}$ ) were dissolved in  $\text{CH}_2\text{Cl}_2$  (1 mL). To the solution, triethylamine (27.9  $\mu\text{L}$ , 200  $\mu\text{mol}$ ) was added, and the mixture was stirred at r.t. for 22 h. To the mixture, 1 M HCl aq. was added, and aqueous layer was extracted with  $\text{CH}_2\text{Cl}_2$ . Combined organic layers were washed with saturated  $\text{NaHCO}_3$  aq. and brine. The organic layer was concentrated to afford crude **S9**, which was purified with silica gel column chromatography ( $\text{CH}_2\text{Cl}_2/\text{MeOH} = 1/0$  to  $10/1$ ) to afford **S9** (147 mg, 0.23 mmol, y. quant) as yellow oil.  $^1\text{H}$  NMR (Acetone- $d_6$ , 400 MHz)  $\delta = 7.96$  (brt,  $J = 5.0$  Hz, 1H), 7.14 (s, 2H), 4.09-4.04 (m, 8H), 3.71 (t,  $J = 5.0$  Hz, 4H), 3.65 (t,  $J = 5.0$  Hz, 2H), 3.57-3.39 (m, 18H), 3.34 (t,  $J = 5.5$  Hz, 6H), 3.15 (s, 9H), 2.55 (t,  $J = 2.3$ , 1H).

$^{13}\text{C}$  NMR (Acetone- $d_6$ , 100 MHz)  $\delta = 166.4$ , 153.3, 142.0, 129.9, 107.5, 81.5, 73.1, 72.6, 71.9, 71.3, 71.2, 71.2, 71.1, 71.0, 70.3, 69.7, 58.7, 30.1.

ESI-HRMS:  $m/z$  Calcd for  $\text{C}_{31}\text{H}_{52}\text{NO}_{13}$   $[\text{M}+\text{H}]^+$ : 668.3253 Found: 668.3261.

### 3,4,5-Tris(PEG550)-*N*-(prop-2-yn-1-yl)benzamide (**S10**)

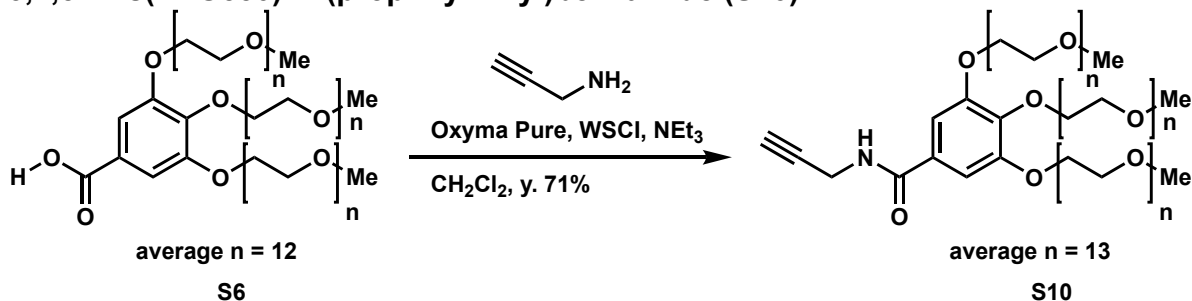

Propargyl amine (9.00 mg, 163  $\mu\text{mol}$ ), **S6** (100 mg, 55.6  $\mu\text{mol}$ ), Oxyma Pure (3.80 mg, 26.7  $\mu\text{mol}$ ) and WSCI-HCl (41.6 mg, 0.217 mmol) were dissolved in  $\text{CH}_2\text{Cl}_2$  (543  $\mu\text{L}$ ). To the solution, triethylamine (30.0  $\mu\text{L}$ , 21.4  $\mu\text{mol}$ ) was added, and the mixture was refluxed for 5 h. To the mixture, 1 M HCl aq. was added, and aqueous layer was extracted with  $\text{CH}_2\text{Cl}_2$ . Combined organic layers were washed with saturated  $\text{NaHCO}_3$  aq., and brine. The organic layer was concentrated to afford crude **S10**, which was purified with preparative HPLC (Method c) to give **S10** (78.2 mg, 39.7  $\mu\text{mol}$ , y. 71%) as yellow oil.  $^1\text{H}$  NMR (Acetone- $d_6$ , 500 MHz)  $\delta = 8.09$  (brt,  $J = 5.2$  Hz, 1H), 7.28 (s, 2H), 4.23-4.16 (m, 8H), 3.85 (t,  $J = 5.2$  Hz, 4H), 3.78 (t,  $J = 5.2$  Hz, 2H), 3.73-3.41 (m, 140H), 3.28 (s, 9H), 2.67 (brs, 1H).

$^{13}\text{C}$  NMR (Acetone- $d_6$ , 125 MHz)  $\delta = 166.4$ , 153.3, 142.0, 129.9, 107.6, 81.7, 73.1, 72.6, 71.9, 71.4, 71.4, 71.3, 71.3, 71.2, 71.0, 70.3, 69.7, 58.8, 29.7.

Based on the integration of the glycol protons, the average length of the PEG chain was  $n = 13$ .

MALDI-TOFMS spectrum of the product is shown below.

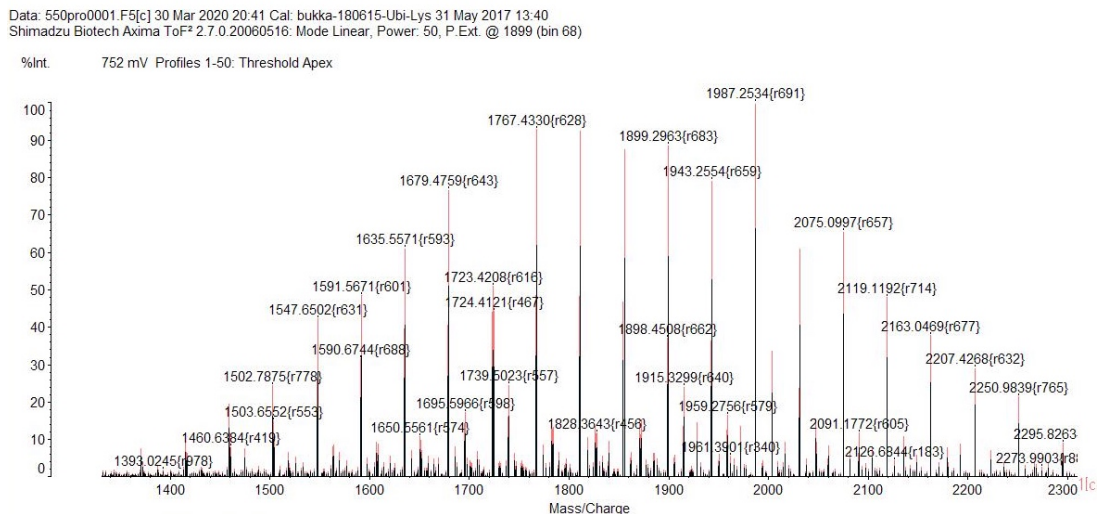

One of the peaks of the highest intensity has  $m/z$  of 1987.2, which corresponds to  $n = 13$  ( $C_{91}H_{171}NNaO_{43}$  [ $M+Na$ ]<sup>+</sup>: 1989.1).

### 3,4,5-Tris(PEG750)-*N*-(prop-2-yn-1-yl)benzamide (**S11**)

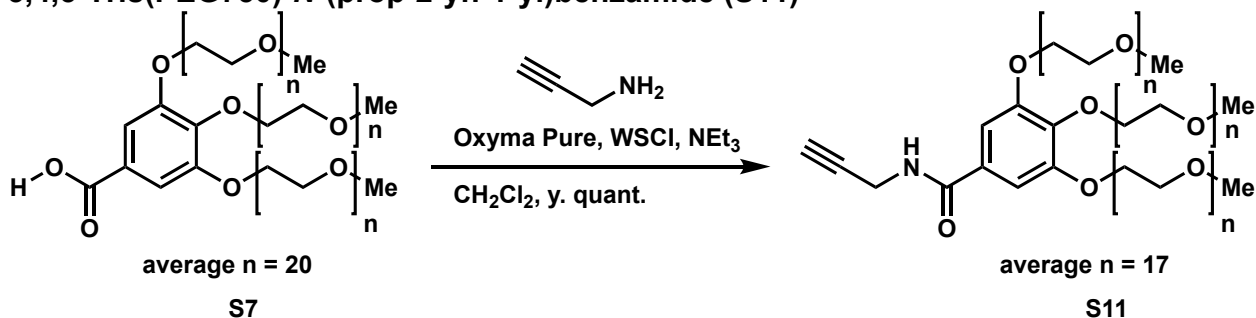

Propargyl amine (4.4 mg, 80  $\mu$ mol), **S7** (108 mg, 38  $\mu$ mol), Oxyma Pure (2.8 mg, 20  $\mu$ mol) and WSCI·HCl (38 mg, 83  $\mu$ mol) were dissolved in  $CH_2Cl_2$  (0.5 mL). To the solution, triethylamine (22  $\mu$ L, 0.16 mmol) was added, and the mixture was stirred at r.t. for 22 h. To the mixture, 1 M HCl aq. was added, and aqueous layer was extracted with  $CH_2Cl_2$ . Combined organic layers were washed with saturated  $NaHCO_3$  aq., brine, and concentrated to afford crude **S11**, which was purified with silica gel column chromatography ( $CH_2Cl_2/MeOH = 1/0$  to  $10/1$ ) to afford **S11** (118 mg, 45  $\mu$ mol, y. quant) as yellow oil.  $^1H$  NMR (Acetone- $d_6$ , 500 MHz)  $\delta = 7.94$  (brt,  $J = 5.2$  Hz, 1H), 7.17 (s, 2H), 4.12-4.03 (m, 8H), 3.74 (t,  $J = 5.2$  Hz, 4H), 3.67 (t,  $J = 5.2$  Hz, 2H), 3.58-3.40 (m, 186H), 3.35-3.31 (m, 7H), 3.17 (s, 9H), 2.56 (brs, 1H).  $^{13}C$  NMR (Acetone- $d_6$ , 125 MHz)  $\delta = 166.3, 153.3, 142.0, 130.0, 125.9, 107.6, 73.1, 72.6, 71.9, 71.4, 71.4, 71.3, 71.3, 71.2, 71.0, 70.3, 69.7, 58.8, 29.7$ .

Based on the integration of the glycol protons, the average length of the PEG chain was  $n = 17$ .

MALDI-TOFMS spectrum of the product is shown below.



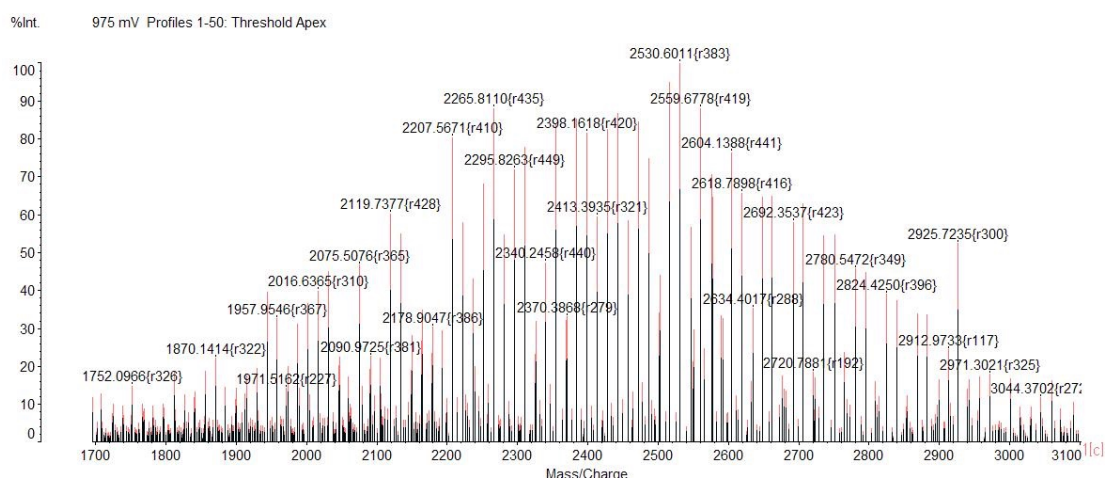

One of the peaks of the highest intensity has  $m/z$  of 2516.12 which corresponds to  $n = 17$  ( $C_{115}H_{219}NNaO_{55}$   $[M+Na]^+$ : 2518.4).

### 3,4,5-Tris(PEG2000)-*N*-(prop-2-yn-1-yl)benzamide (**S12**)

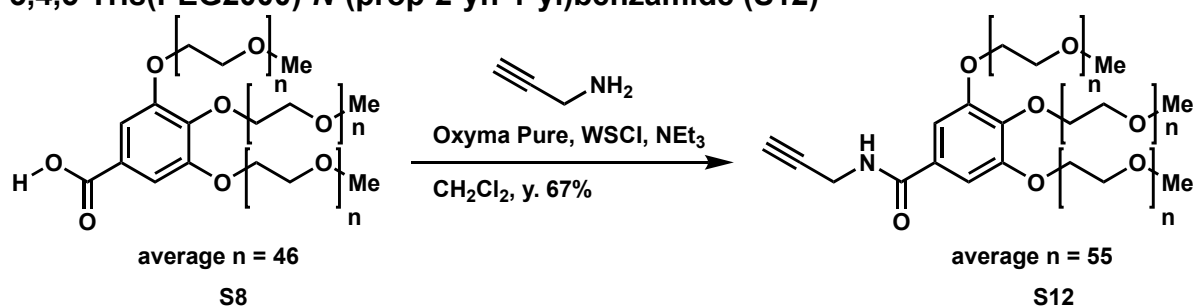

Propargyl amine (2.2 mg, 40  $\mu\text{mol}$ ), **S8** (88 mg, 14  $\mu\text{mol}$ ), Oxyma Pure (1.2 mg, 8.4  $\mu\text{mol}$ ) and WSCI·HCl (10 mg, 52  $\mu\text{mol}$ ) were dissolved in  $\text{CH}_2\text{Cl}_2$  (0.15 mL). To the solution, triethylamine (5.0  $\mu\text{L}$ , 36  $\mu\text{mol}$ ) was added, and the mixture was stirred at r.t. for 22 h. To the mixture, 1 M HCl aq. was added, and aqueous layer was extracted with  $\text{CH}_2\text{Cl}_2$ . Combined organic layers were washed with saturated  $\text{NaHCO}_3$  aq. and brine. The organic layer was concentrated to afford **S12** (71 mg, 9.4  $\mu\text{mol}$ , y. 67%) as yellow solid.  $^1\text{H}$  NMR (Acetone- $d_6$ , 500 MHz)  $\delta = 8.06$  (brt,  $J = 5.2$  Hz, 1H), 7.30 (s, 2H), 4.24-4.17 (m, 8H), 3.86 (t,  $J = 5.2$  Hz, 4H), 3.69 (t,  $J = 1.7$  Hz, 2H), 3.66-3.51 (m, 636H), 3.47-3.42 (m, 8H), 3.28 (s, 9H), 2.68 (t,  $J = 2.3$  Hz, 2H).

$^{13}\text{C}$  NMR (Acetone- $d_6$ , 125 MHz)  $\delta = 166.3, 153.3, 141.8, 130.0, 107.6, 81.9, 73.1, 72.6, 71.9, 71.8, 71.6, 71.4, 71.3, 71.3, 71.2, 71.1, 71.0, 70.5, 70.4, 70.3, 69.7, 58.8, 29.5$ .

Based on the integration of the glycol protons, the average length of the PEG chain was  $n = 55$ .

MALDI-TOFMS spectrum of the product is shown below.



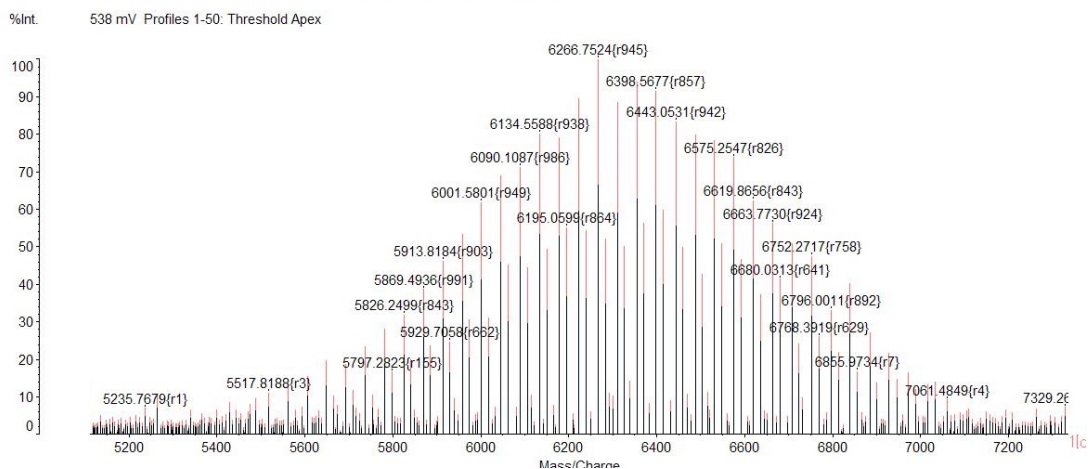

One of the peaks of the highest intensity has  $m/z$  of 6619.8, which corresponds to  $n = 48$  ( $C_{301}H_{591}NNaO_{148}$   $[M+Na]^+$ : 6614.8).

**((1*R*,8*S*,9*S*)-Bicyclo[6.1.0]non-4-yn-9-yl)methyl (2-(2-(2-(3,4,5-tris(PEG550)benzamido)ethoxy)ethoxy)ethyl)carbamate (S13)**

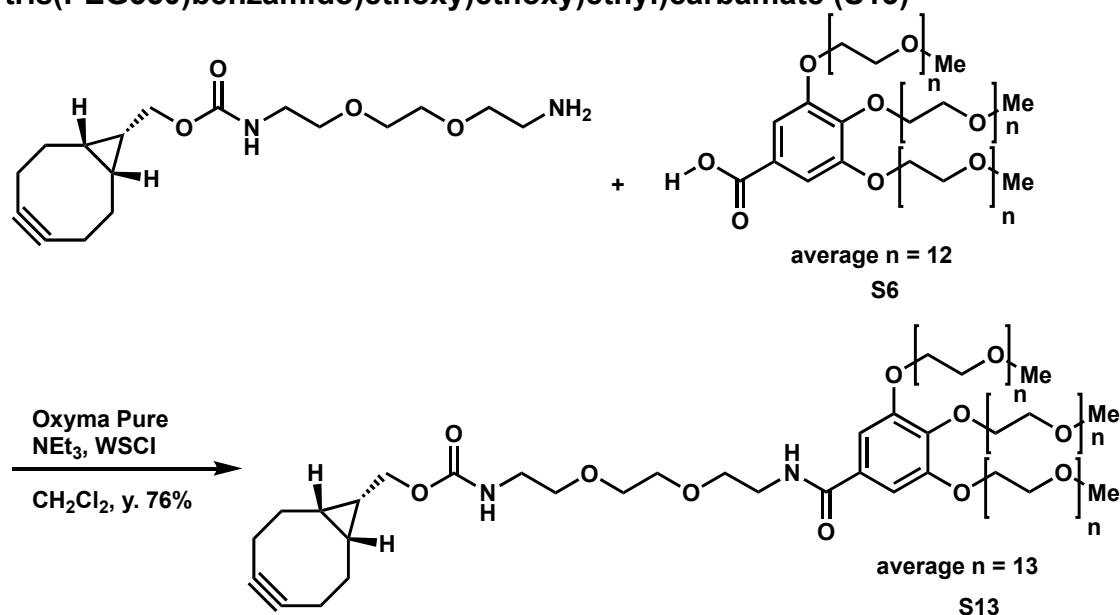

Bicyclo[6.1.0]non-4-yn-9-ylmethyl (2-(2-(2-aminoethoxy)ethoxy)ethyl)carbamate (15 mg, 45  $\mu$ mol), **S6** (80 mg, 45  $\mu$ mol), Oxyma Pure (3.5 mg, 23  $\mu$ mol), and WSCI-HCl (17.3 mg, 90  $\mu$ mol) were dissolved in  $CH_2Cl_2$  (450  $\mu$ L), and triethylamine (14  $\mu$ L, 90  $\mu$ mol) was added. The mixture was stirred at r.t. for 8 h. After addition of 1 M HCl aq. the mixture was extracted by  $CH_2Cl_2$ . The combined organic layers were washed by saturated  $NaHCO_3$  aq., and concentrated. Purification with silica gel column chromatography ( $CH_2Cl_2/MeOH = 15/1$  to  $8/1$ ) gave **S13** (75 mg, 34  $\mu$ mol, y. 76%) as white solid.  $^1H$  NMR (Acetone- $d_6$ , 500 MHz)  $\delta = 7.79$  (brs, 1H), 7.26 (s, 2H), 6.19 (brs, 1H), 4.22-4.17 (m, 6H), 4.08 (d,  $J = 8.0$  Hz, 2H), 3.85 (t,  $J = 4.6$  Hz, 4H), 3.77 (t,  $J = 5.7$  Hz, 2H), 3.70-3.41 (m,

152H), 3.29 (s, 9H), 2.25-2.12 (m, 6H), 1.57-1.55 (m, 2H), 1.33-1.28 (m, 1H), 0.92-0.88 (m, 2H).

Based on the integration of the glycol protons, the average length of the PEG chain was  $n = 13$ .

ESI-MS spectrum of the product is shown below.

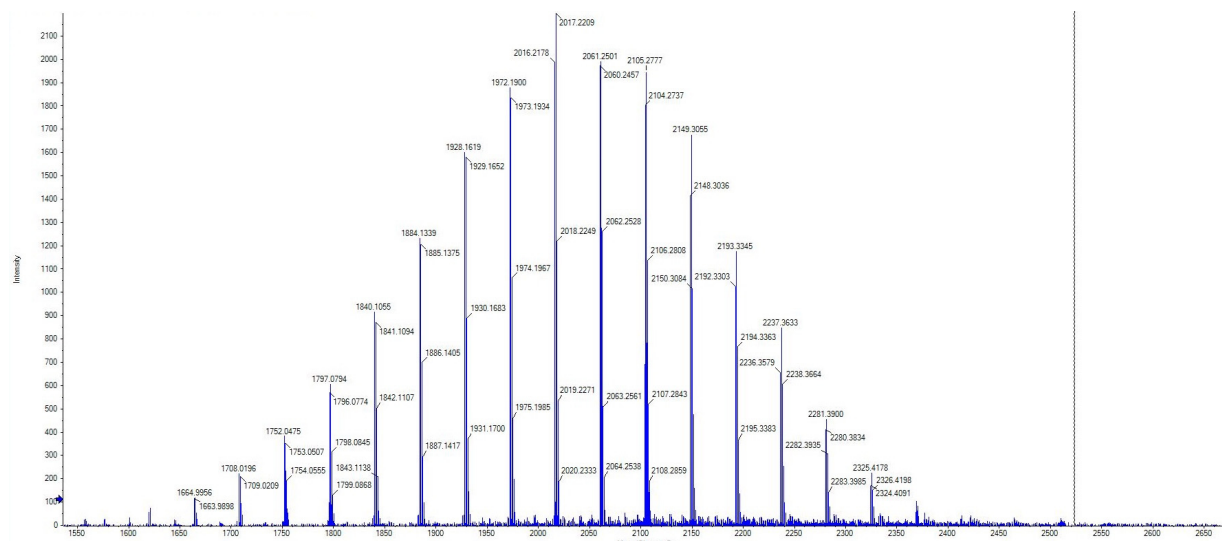

One of the peaks of the highest intensity has  $m/z$  of 2104.2, which corresponds to  $n = 12$  ( $C_{99}H_{181}N_2O_{44}$   $[M-H]^-$ : 2103.2).

**((1*R*,8*S*,9*S*)-Bicyclo[6.1.0]non-4-yn-9-yl)methyl (2-(2-(2-(3,4,5-tris(PEG750)benzamido)ethoxy)ethoxy)ethyl)carbamate (S14)**

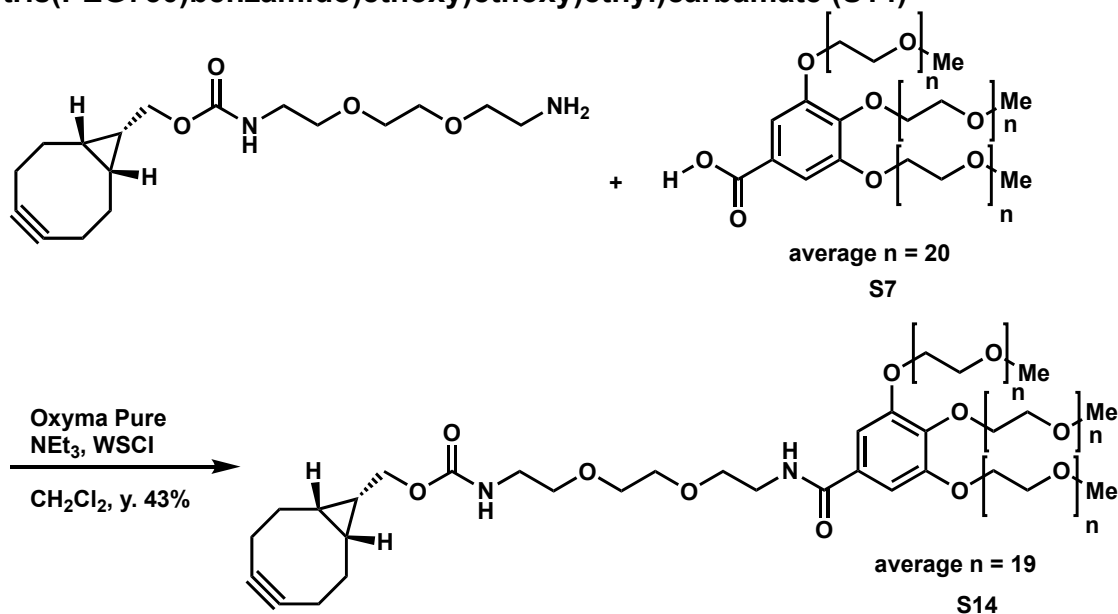

Bicyclo[6.1.0]non-4-yn-9-ylmethyl (2-(2-(2-aminoethoxy)ethoxy)ethyl)carbamate (77.6 mg, 28.3  $\mu$ mol), **S7** (10.0 mg, 35.0  $\mu$ mol), Oxyma Pure (2.5 mg, 18.6  $\mu$ mol),

and WSCI-HCl (20.0 mg, 104  $\mu\text{mol}$ ) were dissolved in  $\text{CH}_2\text{Cl}_2$  (500  $\mu\text{L}$ ), and triethylamine (10.0  $\mu\text{L}$ , 71.7  $\mu\text{mol}$ ) was added. The mixture was stirred at r.t. for 6 h. To the mixture, 1 M HCl aq. was added, and the aqueous layer was extracted by  $\text{CH}_2\text{Cl}_2$ . Combined organic layers were washed with saturated  $\text{NaHCO}_3$  aq. and brine, and the organic layer was concentrated. Purification with preparative HPLC (method c) afforded **S15** (46 mg, 15.2  $\mu\text{mol}$ , y. 43%) as yellow oil.  $^1\text{H}$  NMR (Acetone- $d_6$ , 400 MHz)  $\delta$  = 7.83 (brs, 1H), 7.23 (s, 2H), 6.21 (brs, 1H), 4.19-4.16 (m, 6H), 4.03 (d,  $J$  = 8.7 Hz, 2H), 3.82-3.80 (m, 4H), 3.74-3.72 (m, 2H), 3.65-3.40 (m, 219H), 3.23 (s, 9H), 2.14-2.02 (m, 6H), 1.55-1.48 (m, 2H), 1.31-1.28 (m, 1H), 0.86-0.79 (m, 2H).

Based on the integration of the glycol protons, the average length of the PEG chain was  $n = 19$ .

ESI-MS spectrum of the product is shown below.

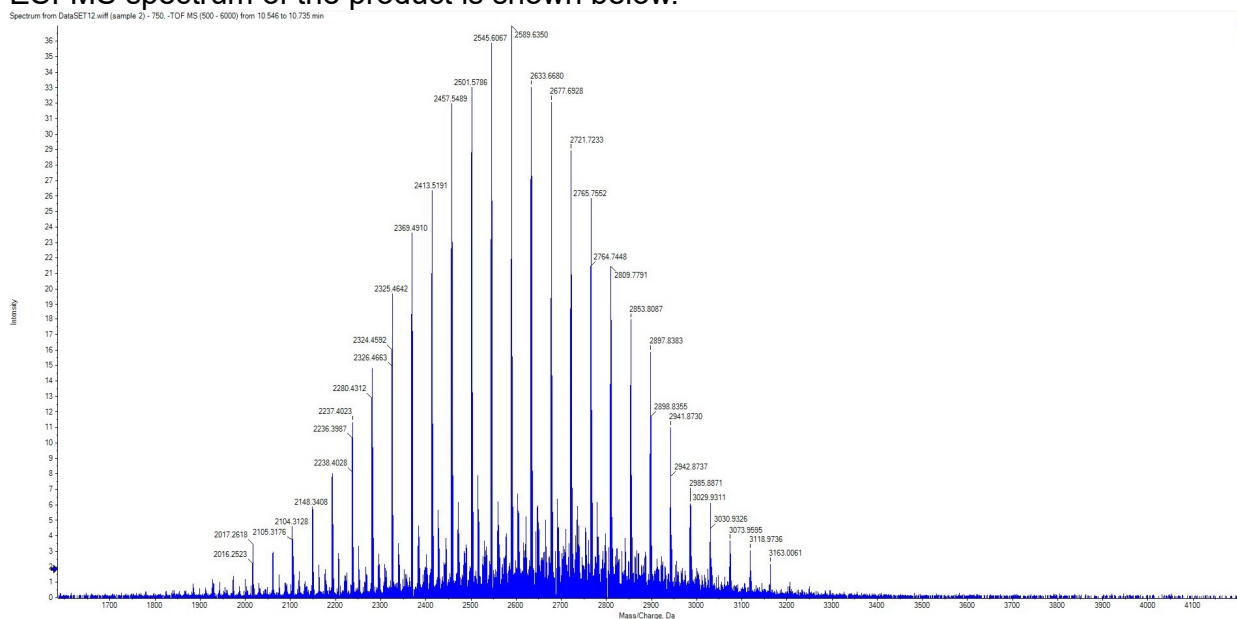

One of the peaks of the highest intensity has  $m/z$  of 2633.6, which corresponds to  $n = 16$  ( $\text{C}_{123}\text{H}_{229}\text{N}_2\text{O}_{56}$   $[\text{M}-\text{H}]^-$ : 2631.5).

**Bicyclo[6.1.0]non-4-yn-9-yl (2-(2-(2-(3,4,5-tris(PEG<sub>2000</sub>)benzamido)ethoxy)ethoxy)ethyl)carbamate (**S15**)**

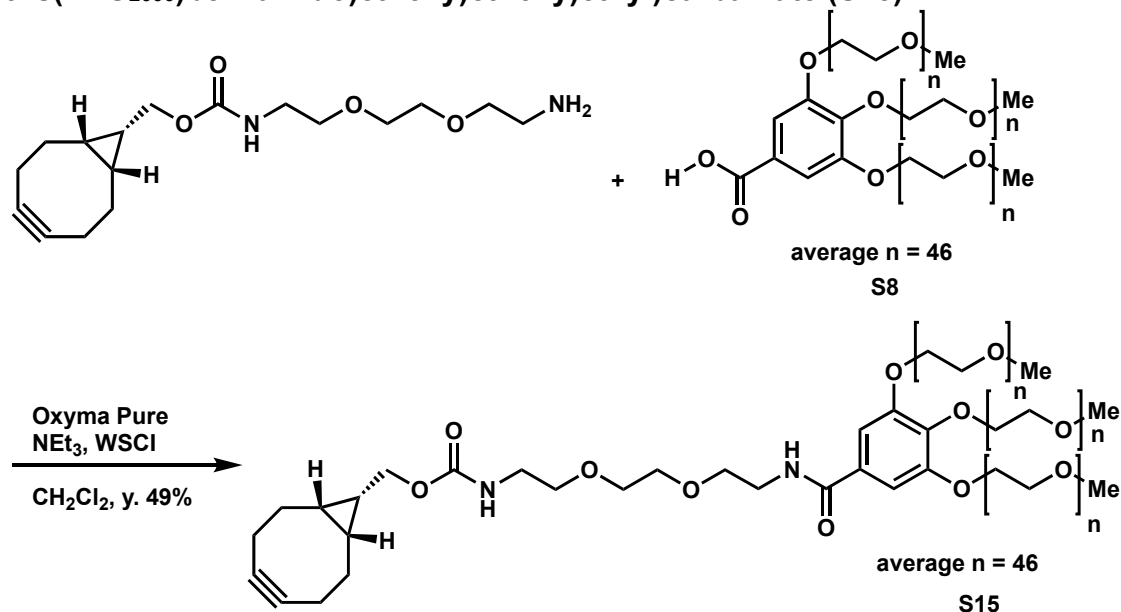

Bicyclo[6.1.0]non-4-yn-9-ylmethyl (2-(2-(2-aminoethoxy)ethoxy)ethyl)carbamate (5.0 mg, 15  $\mu$ mol), **S8** (88 mg, 13.9  $\mu$ mol), Oxyma Pure (1.2 mg, 8.4  $\mu$ mol), and WSCI-HCl (12 mg, 62.5  $\mu$ mol) were dissolved in CH<sub>2</sub>Cl<sub>2</sub> (150  $\mu$ L), and triethylamine (5  $\mu$ L, 36  $\mu$ mol) was added. The mixture was stirred at r.t. for 24 h. To the mixture, 1 M HCl aq. was added, and the aqueous layer was extracted with CH<sub>2</sub>Cl<sub>2</sub>. Combined organic layers were washed with saturated NaHCO<sub>3</sub> aq. and brine, and the organic layer was concentrated. Purification with preparative HPLC (method d) afforded **S15** (45 mg, 6.8  $\mu$ mol, y. 49%) as white solid. <sup>1</sup>H NMR (Acetone-*d*<sub>6</sub>, 500 MHz)  $\delta$  = 7.82 (brs, 1H), 7.27 (s, 2H), 6.23 (brs, 1H), 4.22 (t, *J* = 4.6 Hz, 4H), 4.20 (t, *J* = 4.6 Hz, 2H), 4.09 (d, *J* = 8.0 Hz, 2H), 3.86 (t, *J* = 4.6 Hz, 4H), 3.78 (t, *J* = 4.6 Hz, 2H), 3.47-3.51 (m, 543H), 3.47-3.42 (m, 10H), 3.28 (s, 9H), 2.23-2.12 (m, 6H), 1.57-1.55 (m, 2H), 1.33-1.30 (m, 1H), 0.91-0.87 (m, 2H).

<sup>13</sup>C NMR (Acetone-*d*<sub>6</sub>, 125 MHz)  $\delta$  = 166.9, 157.5, 153.3, 141.8, 130.7, 107.6, 99.4, 73.2, 72.6, 71.8, 71.4, 71.3, 71.2, 71.0, 70.9, 70.6, 70.4, 70.3, 69.7, 62.5, 58.8, 41.4, 40.5, 21.7, 20.8, 19.8, 18.7.

Based on the integration of the glycol protons, the average length of the PEG chain was *n* = 46.

ESI-MS spectrum of the product is shown below.

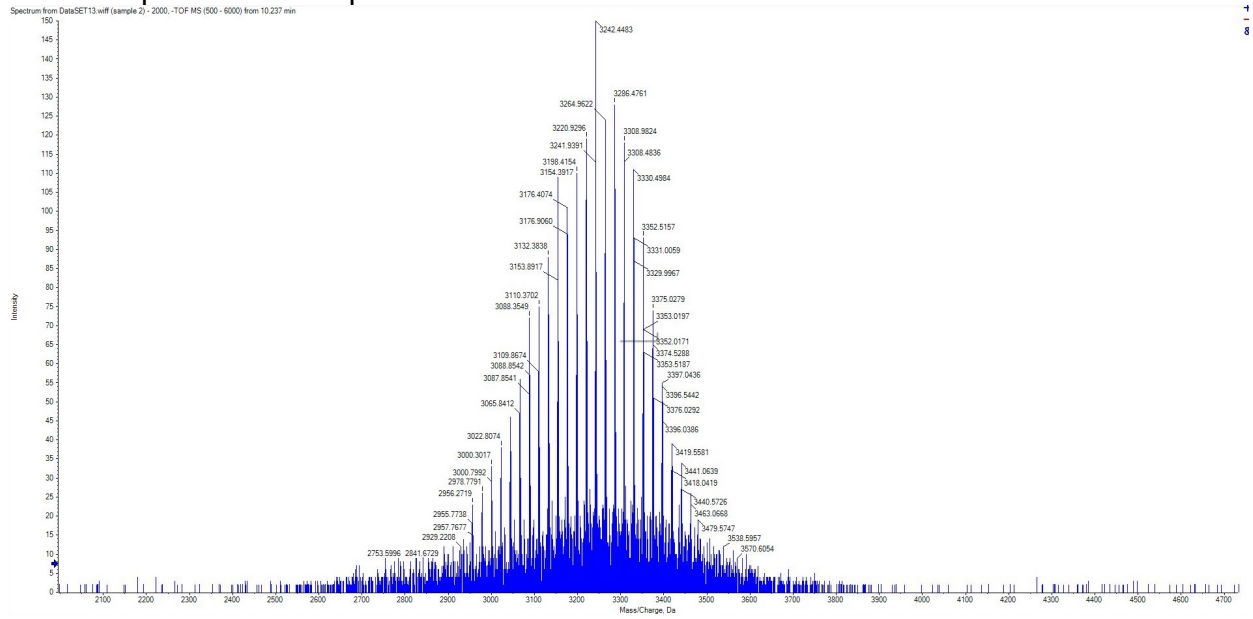

One of the peak of the highest intensity has  $m/z$  of 3242.4, which corresponds to  $n = 45$  ( $C_{297}H_{575}N_2NaO_{143} [M+Na-3H]^{2-}$ : 3242.4).

## Synthesis of peptides

Peptides were synthesized on a solid phase using NovaPEG-Rink-amide-resin or Rink-Amide-AM-resin. Fmoc-amino acid was sequentially coupled using a DIC-HOBt method in DMF (3 equiv each) for 60 min at r.t. after removal of each Fmoc group with 20% piperidine-DMF for 10 min. DSH or DSSMe building block (1.5 equiv) was coupled using HATU-HOAt method (2 or 1.5 equiv each) with *N,N*-diisopropylethylamine (5 equiv) in DMF. *N*-Terminus was capped with 20% acetic anhydride in CH<sub>2</sub>Cl<sub>2</sub> for 5 min, if necessary. The peptide was cleaved from the resin by treatment with TFA in the presence of TIPS and H<sub>2</sub>O (95:2.5:2.5) for 90 min at r.t., concentrated under reduced pressure, and precipitated with ether to afford crude peptides, which were purified with preparative HPLC to afford product peptides as white solids after lyophilization.

### LANA<sub>5-15</sub>-DSH (1)

Synthesized as reported in the literature (3).

### LANA<sub>5-22</sub>-DSH (2)

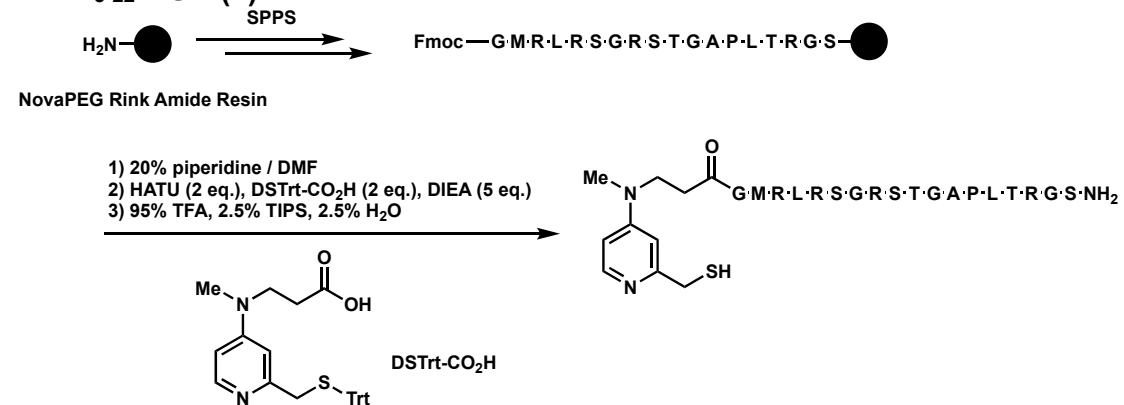

Crude HPLC (Method g):

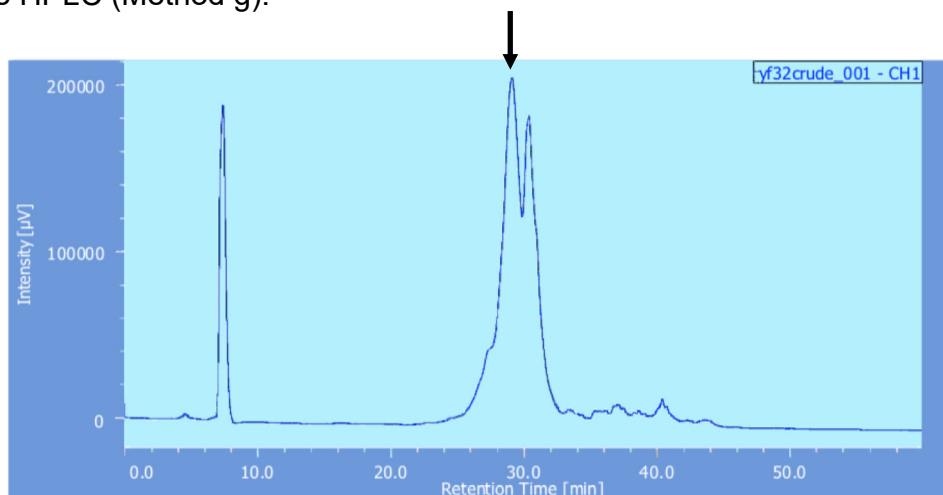

The black arrow indicates the position of the target peptide.

After HPLC separation (Method C) :

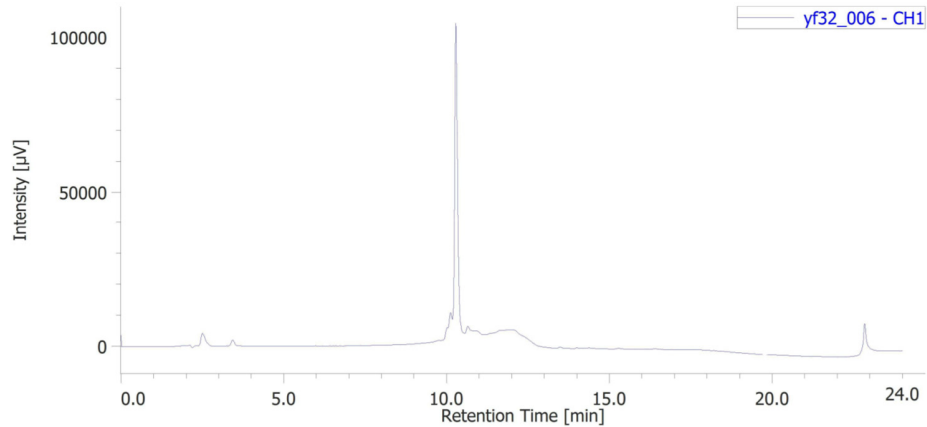

ESI-MS  $m/z$  Calcd: 689.7  $[M+3H]^{3+}$ , Found : 689.9; Retention time: 10.3 min (Method C), 1.2 mg, y. 0.5 %.

#### LANA<sub>5-15</sub>-FITC (4)

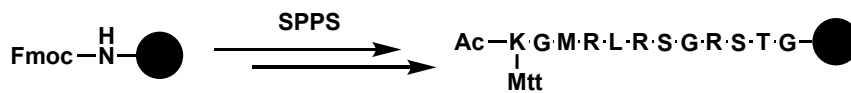

Rink Amide AM-resin

2% TFA, 5% TIPS, CH<sub>2</sub>Cl<sub>2</sub>  
30 sec x 10;  
FITC (3 eq.), DIEA (4 eq.), DMF, 4 h  
95% TFA, 2.5% TIPS, 2.5% H<sub>2</sub>O

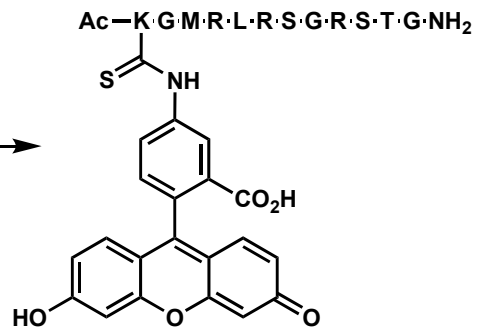

Crude HPLC (Method I):

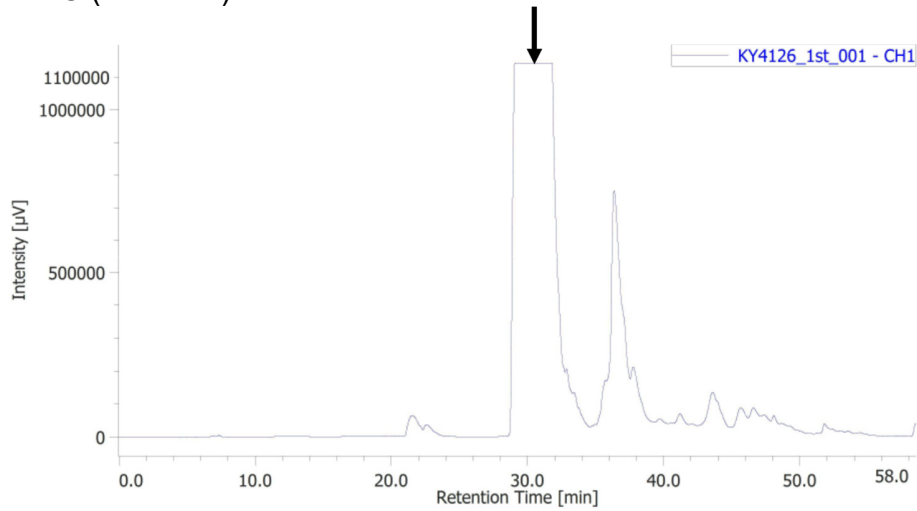

The black arrow indicates the position of the target peptide.

After HPLC separation (Method A):

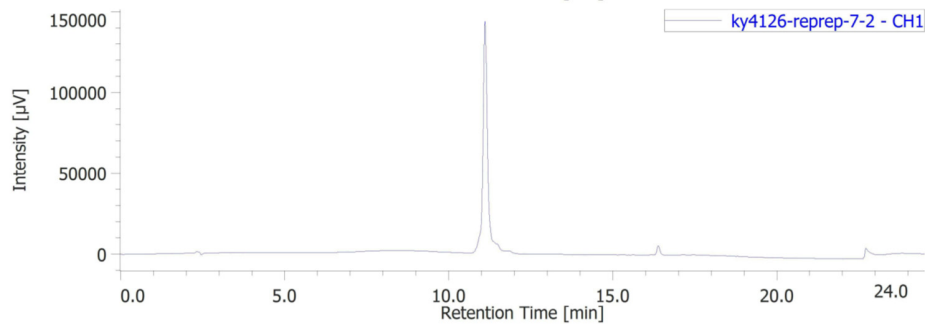

MALDI-TOFMS  $m/z$  Calcd: 1735.8  $[M+H]^+$ , Found: 1735.4; Retention time: 11.2 min (Method A), 56.2 mg, y. 34%.

### LANA<sub>5-22</sub>-FITC (5)

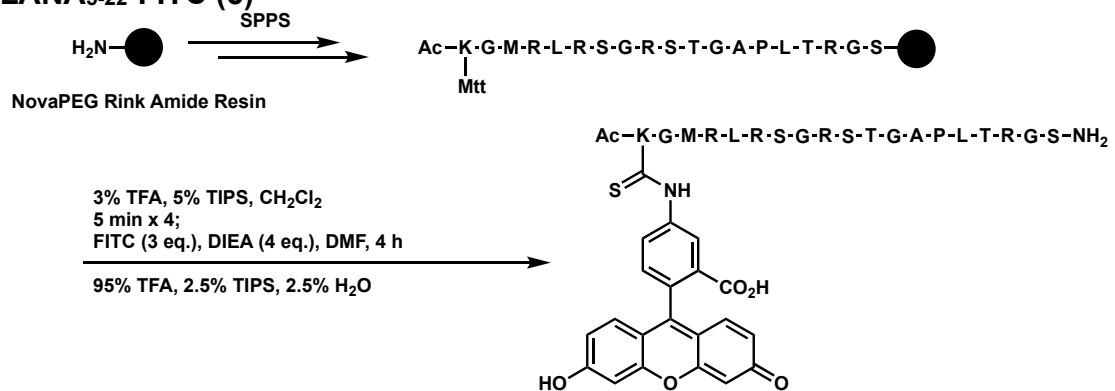





Crude HPLC (Method h):

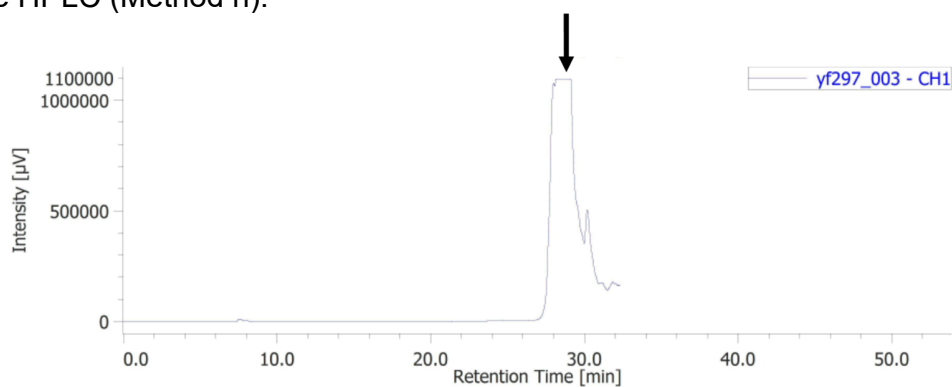

The black arrow indicates the position of the target peptide.

After HPLC separation (Method A):

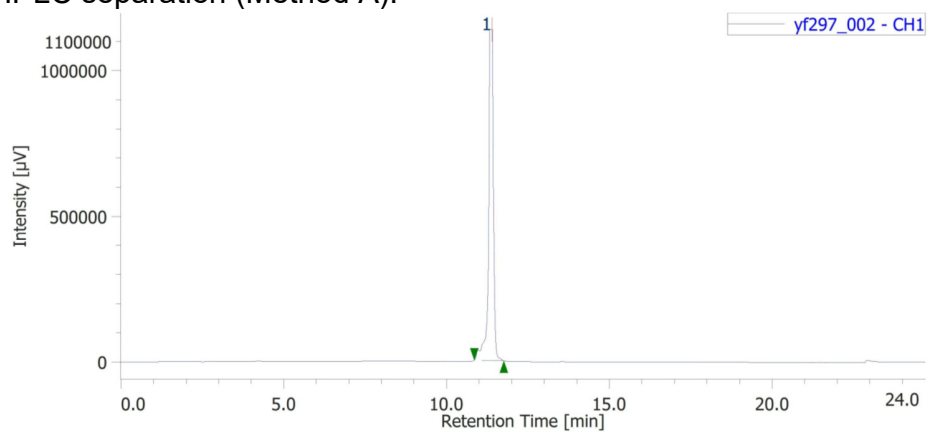

MALDI-TOFMS  $m/z$  Calcd: 2941.4  $[M+H]^+$ , Found: 2941.2; Retention time: 11.4 min (Method A), 23.8 mg, y. 18.0%.

### N<sub>3</sub>-LANA-DSSMe [DSSMe- LANA<sub>5-22</sub>-aaK(Ac)K(AcN<sub>3</sub>)-NH<sub>2</sub>] (S16)

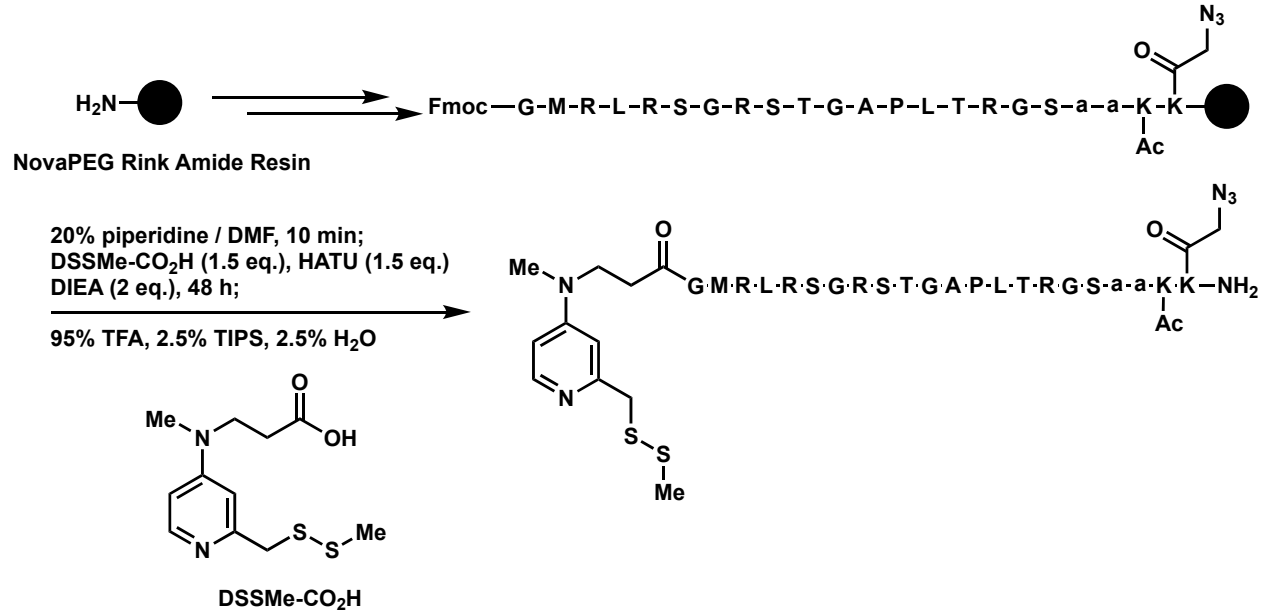

Crude HPLC (Method i):

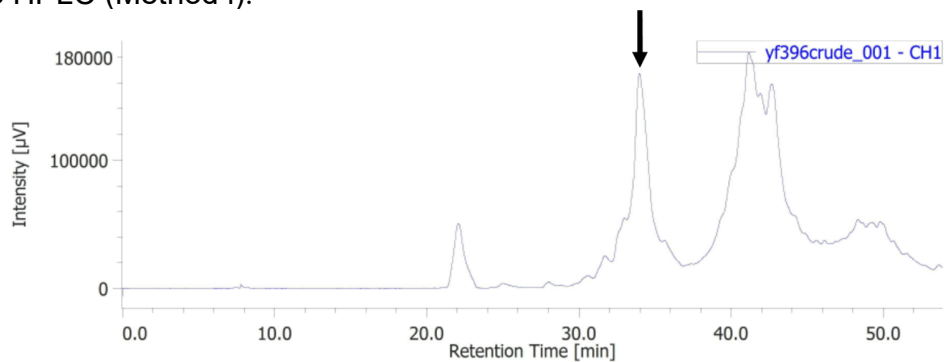

The black arrow indicates the position of the target peptide.

After HPLC separation (Method A):

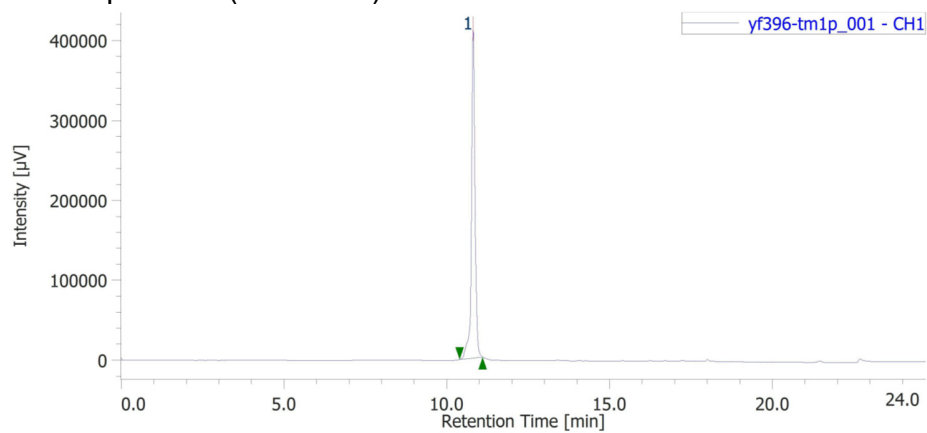

MALDI-TOFMS  $m/z$  Calcd: 2636.4  $[M+H]^+$ , Found: 2635.3; Retention time: 10.8 min (Method A), 39.0 mg, y. 4.11 %.

**Authentic peptide of H2B G114-K125 (lysine propionylated) for in-cell reaction (S17).**

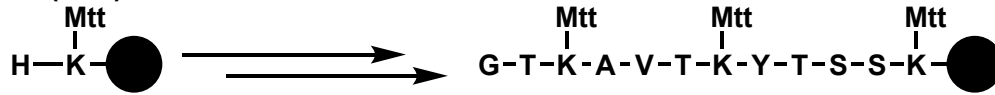

**Fmoc-Lys(Mtt)-Wang resin**

3% TFA, 5% TIPS,  $\text{CH}_2\text{Cl}_2$  5 min x 4;  
10%  $\text{Pr}_2\text{O}$  /  $\text{CH}_2\text{Cl}_2$ , 10 eq. DIEA(10 eq.)  
10 min x 3;

95% TFA, 2.5% TIPS, 2.5%  $\text{H}_2\text{O}$

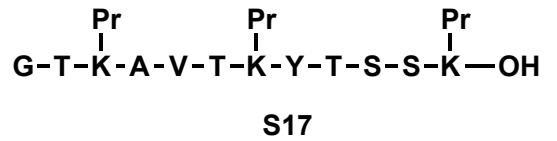

Crude HPLC (Method k):

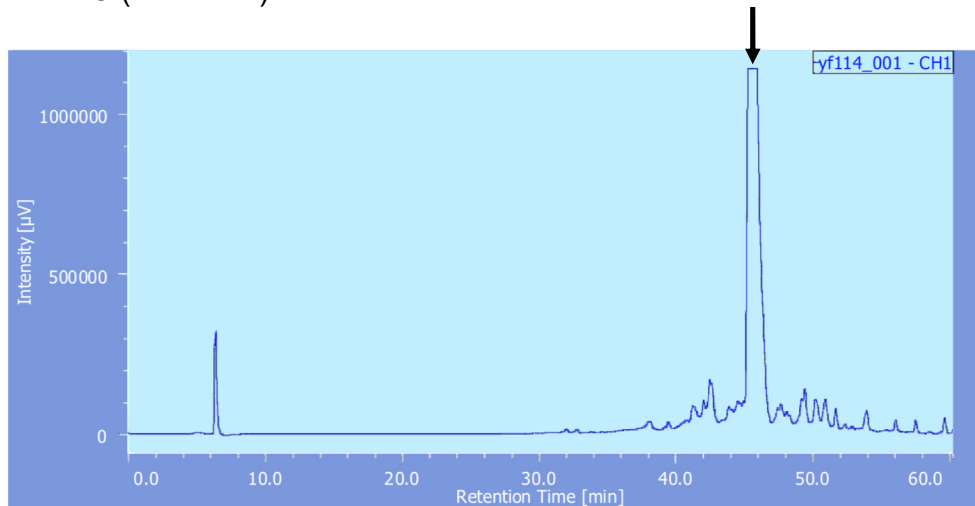

The black arrow indicates the position of the target peptide.

TM (Method B):

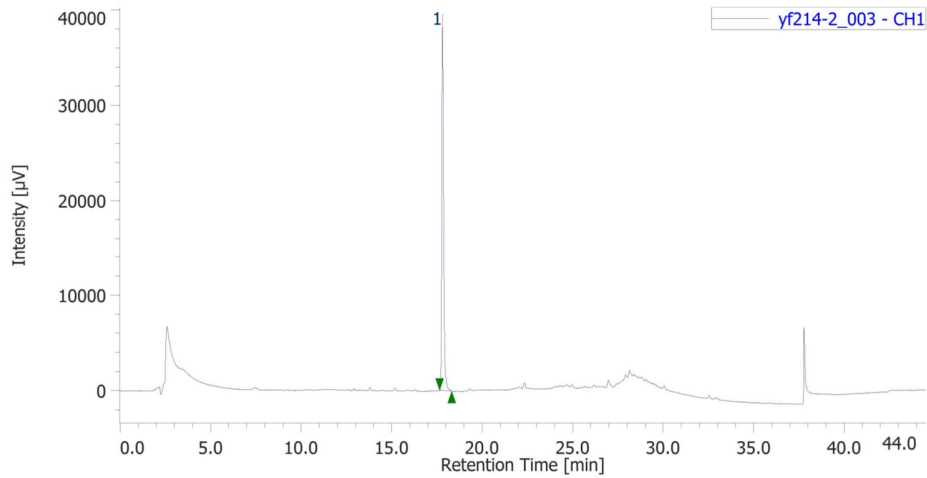

ESI-TOFMS  $m/z$  Calcd: 719.8  $[M+2H]^{2+}$ , Found: 719.8; Retention time: 17.8 min (Method A), 1.65 mg, y. 5.17 %.

**Authentic peptide of H2B G114-K125 (K120 acetylated) for in-cell reaction (S18).**

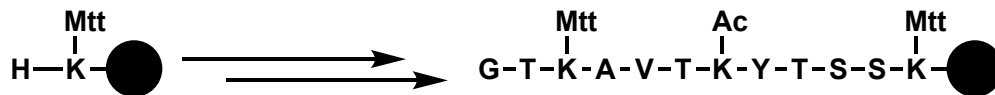

**Fmoc-Lys(Mtt)-Wang resin**

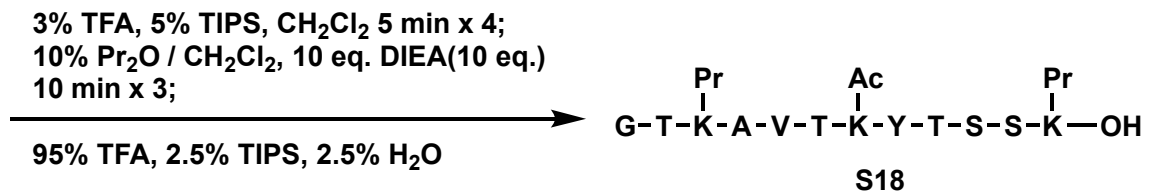

Crude HPLC (Method k):

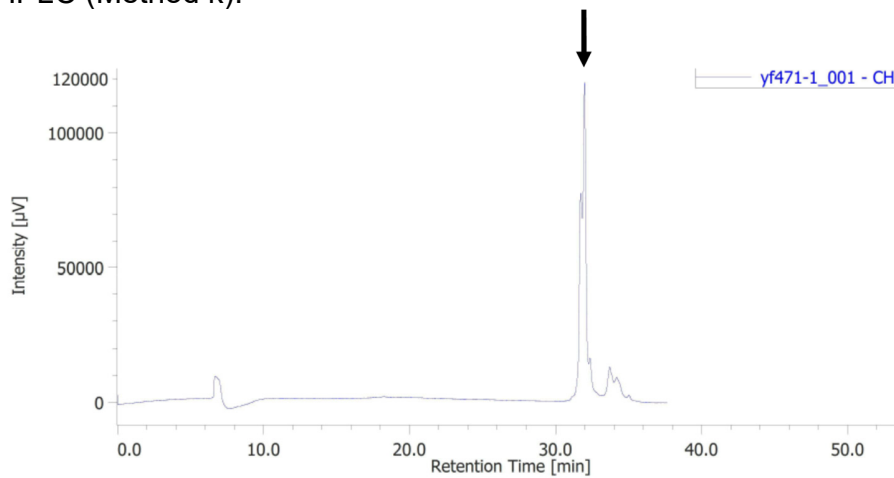

The black arrow indicates the position of the target peptide.

After HPLC separation (Method D):

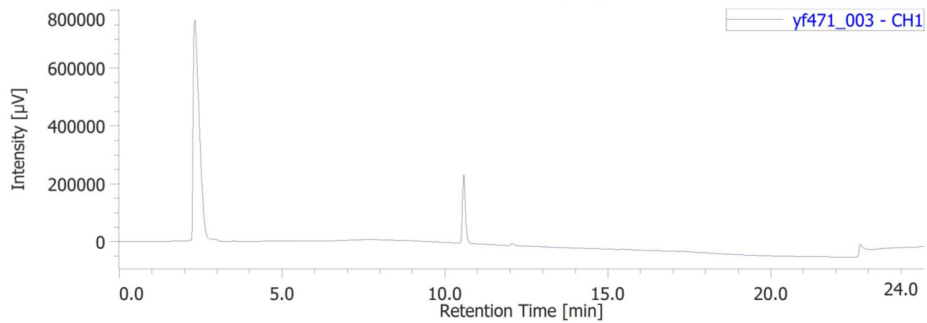

ESI-TOFMS  $m/z$  Calcd: 712.8  $[M+2H]^{2+}$ , Found: 712.8; Retention time: 10.6 min (Method D), 1.77 mg, y. 10.4%.

**N<sub>3</sub>-mutLANA-DSSMe [DSSMe-AA-LANA<sub>7-22</sub>-aaK(Ac)K(AcN<sub>3</sub>)-NH<sub>2</sub>] (S19)**

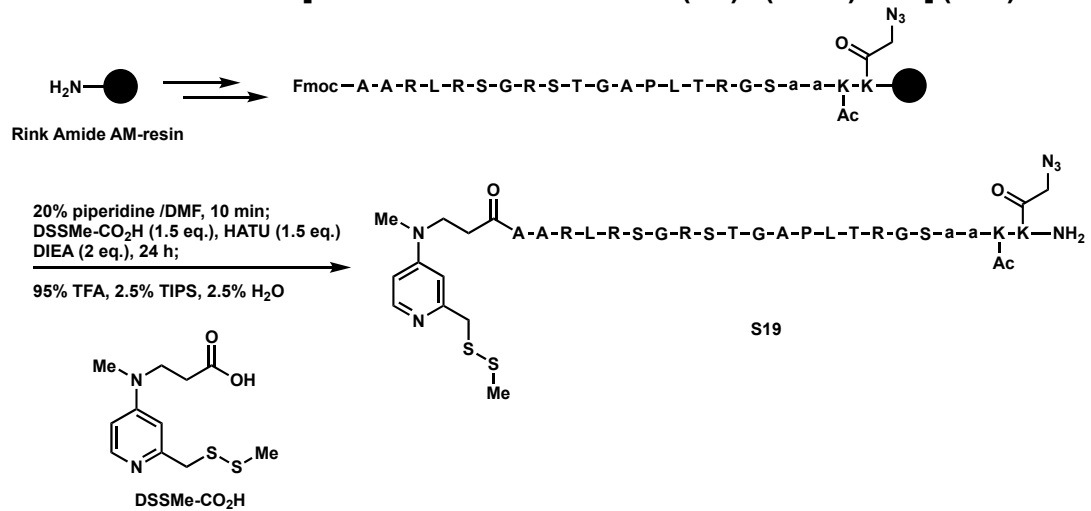

Crude HPLC (Method k):

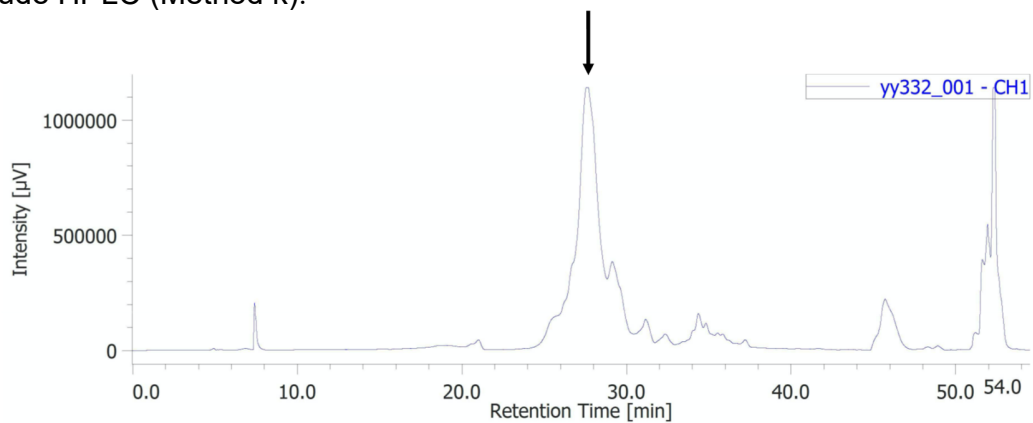

The black arrow indicates the position of the target peptide.

After HPLC separation (Method D):

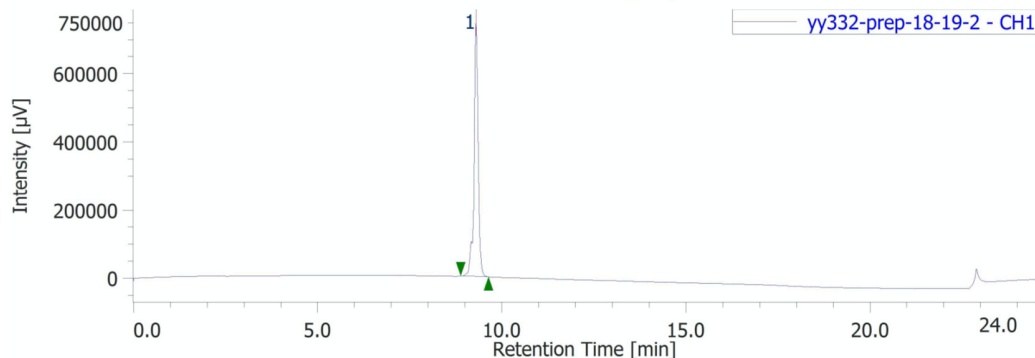

ESI-TOFMS  $m/z$  Calcd: 864.1  $[M+3H]^{3+}$ , Found: 864.4; Retention time: 9.30 min (Method D), 35.0 mg, y. 19.3%.

### Synthesis of PEG-conjugated peptides PEG<sub>x</sub>-LANA-FITC (7, 8, 9, 10)

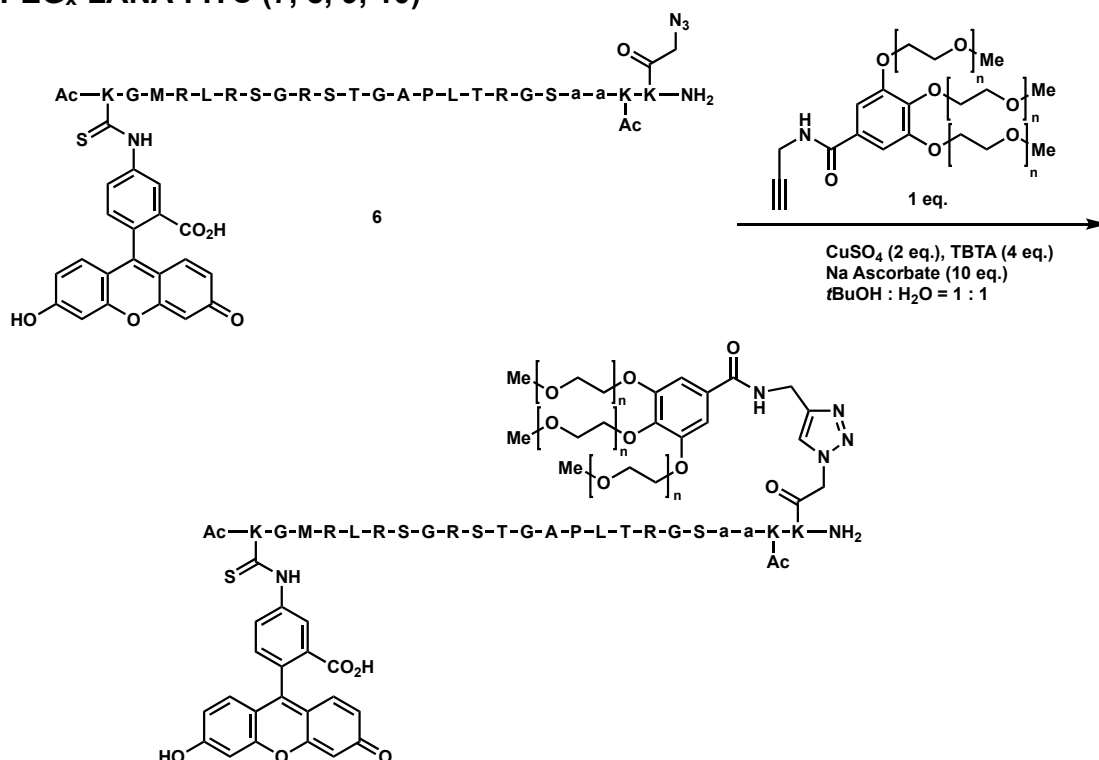

To a stirred solution of **6** (10 mM in water, 30  $\mu\text{L}$ , 300 pmol) and alkyne (**S9-S12**) (10 mM in  $t\text{BuOH}$ , 30  $\mu\text{L}$ , 0.30  $\mu\text{mol}$ ), Cu-TBTA solution in water: $t\text{BuOH}$  (1:2, 75  $\mu\text{L}$ ; separately prepared by mixing 24 mM  $\text{CuSO}_4$  solution in water and 24 mM TBTA solution in  $t\text{BuOH}$ ) was added. Sodium ascorbate aqueous solution (100 mM, 30  $\mu\text{L}$ , 3.0  $\mu\text{mol}$ ) was lastly added, and the mixture was stirred at r.t. for 22 h. Insoluble materials were removed by filtration, and filtrate was purified with preparative HPLC (method e) to afford PEG<sub>x</sub>-LANA-FITC after lyophilization.

### PEG<sub>150</sub>-LANA-FITC (7)

Crude HPLC (Method A):

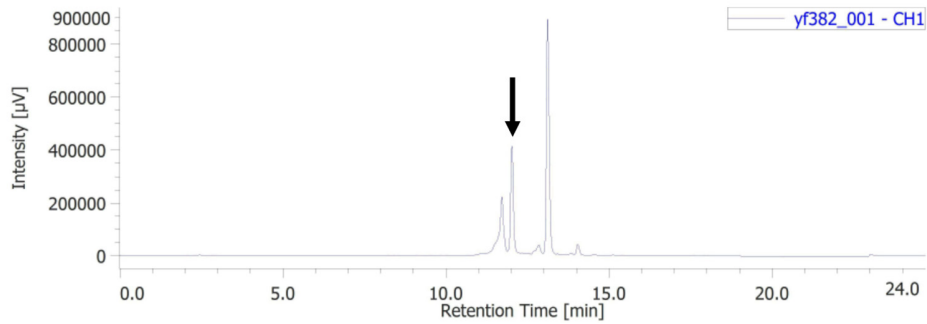

The black arrow indicates the position of the target peptide.

After HPLC separation (Method A):

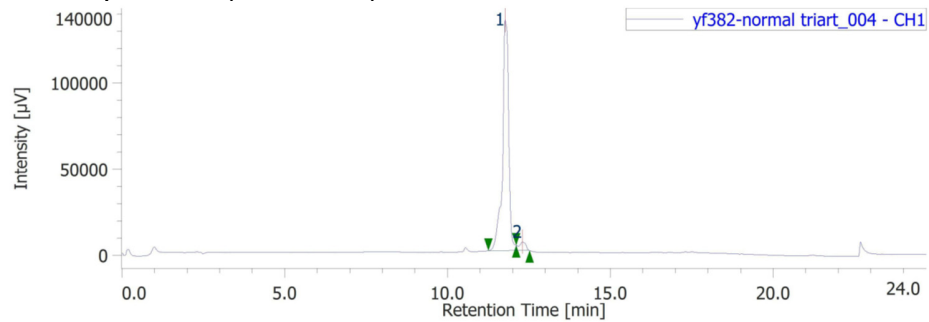

0.98 mg, 0.236 μmol, y. 79%, yellow powder  
MALDI-TOFMS  $m/z$  Calcd: 3586.8 [M+H]<sup>+</sup>, Found: 3587.2; Retention time: 11.8 min (Method A).

### PEG<sub>550</sub>-LANA-FITC (8)

Crude (Method A):

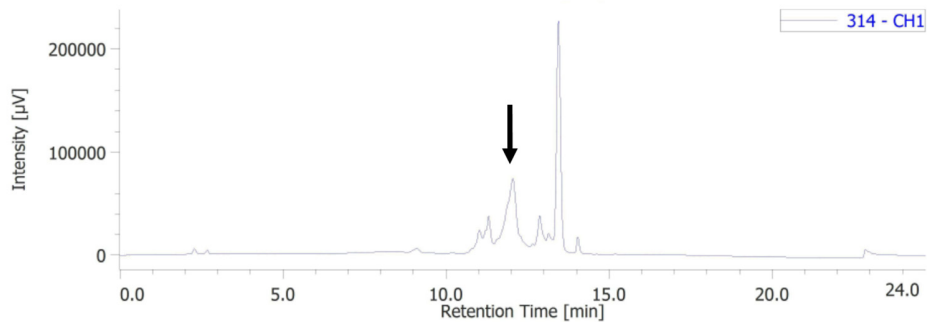

The black arrow indicates the position of the target peptide.



After HPLC separation (Method A):

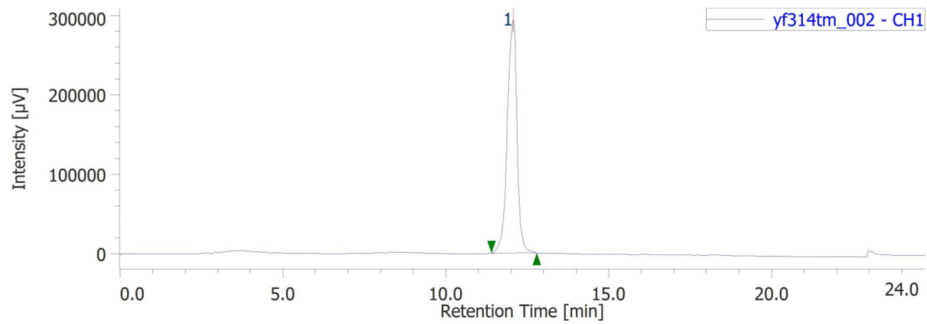

1.27 mg, 0.344 µmol, y. quant., yellow powder. Retention time: 12.7 min (Method A).

ESI-MS spectrum of the product is shown below.

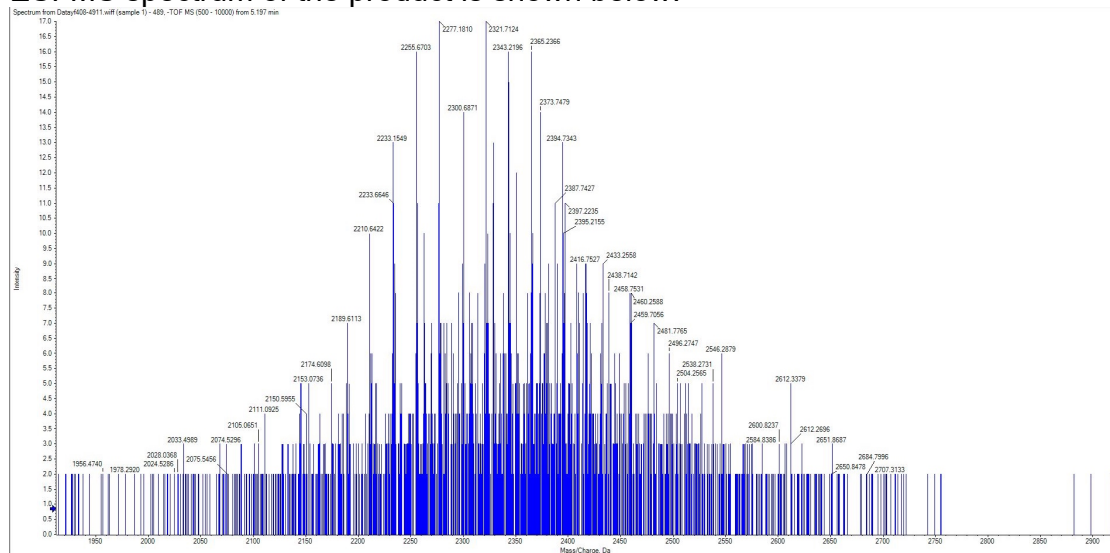

One of the peaks of the highest intensity has  $m/z$  of 2321.7, which corresponds to  $n = 11$  (Calcd: 2321.2  $[M-2H]^{2-}$ ).

**PEG<sub>750</sub>-LANA-FITC (9)**  
Crude HPLC (Method e):

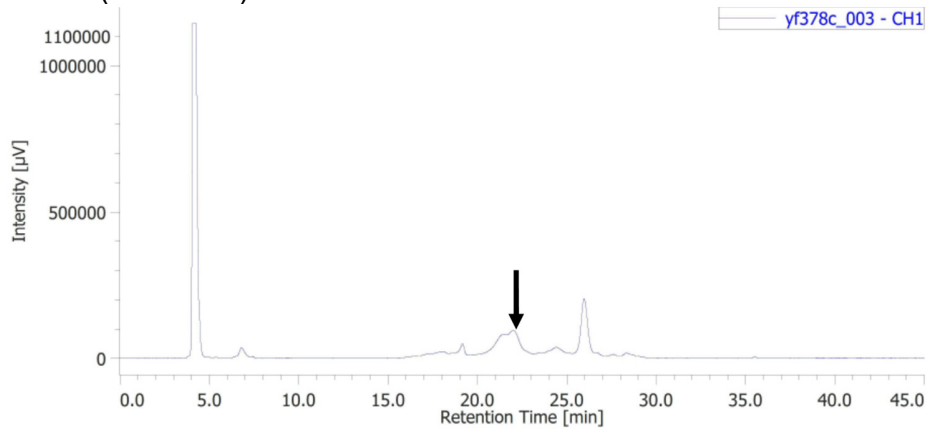

The black arrow indicates the position of the target peptide.

After HPLC separation (Method A):

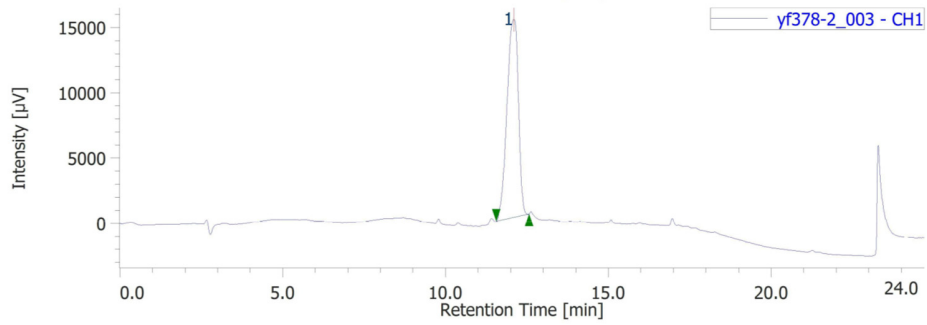

1.52 mg, 0.247 µmol, y. 82%, yellow powder. Retention time: 12.1 min (Method A).

ESI-MS spectrum of the product is shown below.

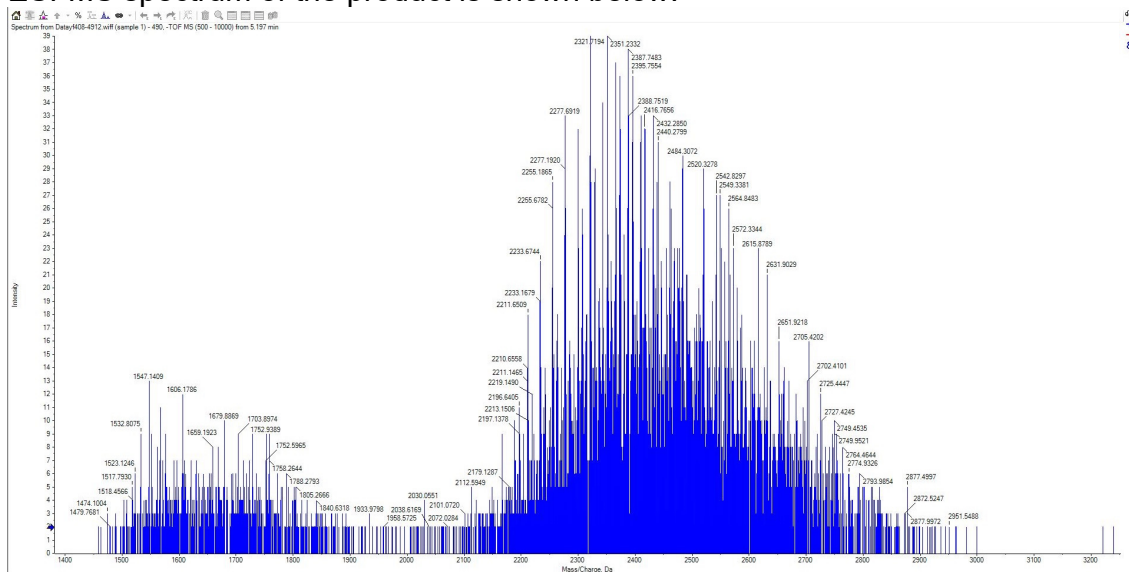

Peaks in the range of 1500–1900 are those of product trivalent anions, and peaks in the range of 2200–2900 are those of product divalent anions. For example, one of the peaks of the divalent anions has  $m/z$  of 2520.3, which corresponds to  $n = 14$  (Calcd: 2519.3  $[M-2H]^2$ ).

### PEG<sub>2000</sub>-LANA-FITC (10)

Crude HPLC (Method e):

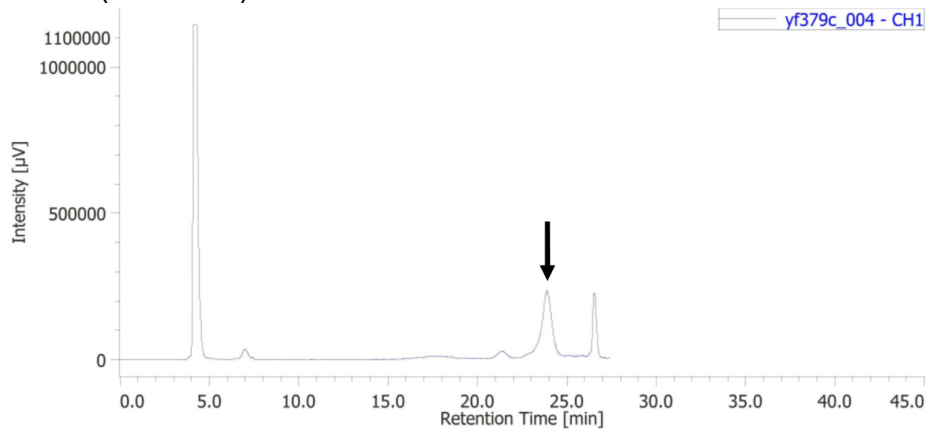

The black arrow indicates the position of the target peptide.

After HPLC separation (Method A):

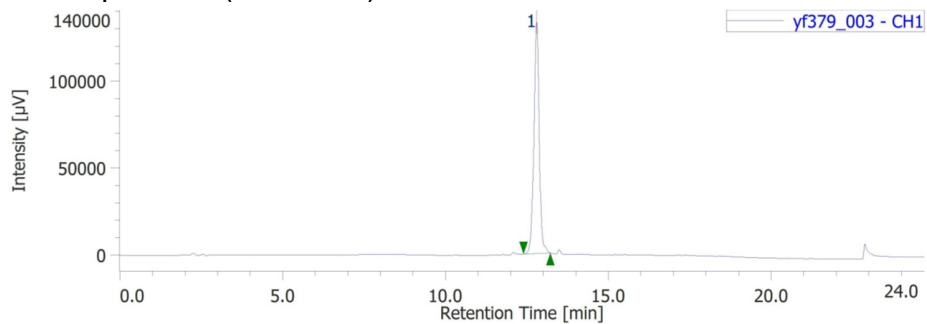

1.44 mg, 0.151  $\mu\text{mol}$ , y. 50%, yellow powder. Retention time: 12.8 min (Method A).

ESI-MS spectrum of the product is shown below.

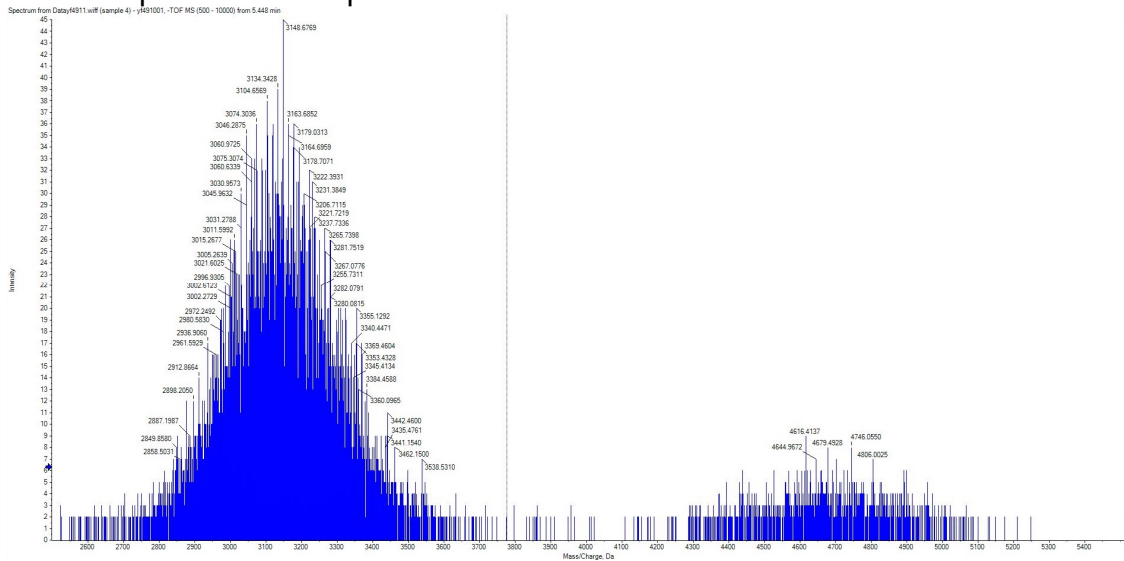

Peaks in the range of 2800–3600 are those of product trivalent anions, and peaks in the range of 4300–5000 are those of product divalent anions. For example, one of the peaks of the trivalent anions has  $m/z$  of 3134.3, which corresponds to  $n = 47$  (Calcd: 3132.7  $[M-3H]^{3-}$ ).

### PEG<sub>x</sub>-LANA-DSSMe (11, 12, 13)

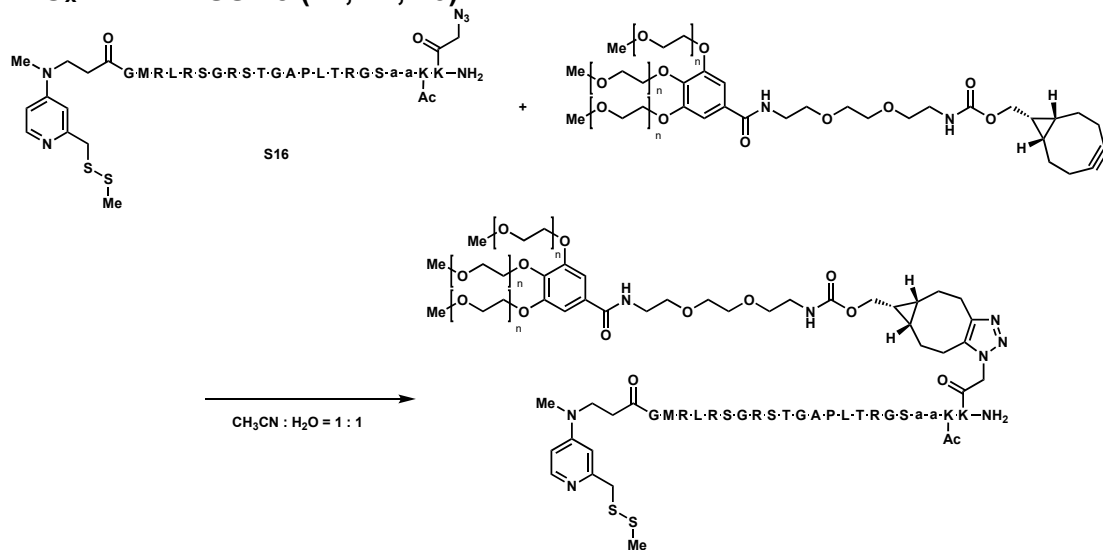

Peptide **S16** (10 mM in water, 800  $\mu\text{L}$ , 8.0  $\mu\text{mol}$ ) and alkyne **S13**, **S14**, or **S15** (10 mM in MeCN, 800  $\mu\text{L}$ , 8.0  $\mu\text{mol}$ ) were mixed in water:MeCN (1:1). The mixture was stirred at r.t for 24 h, and insoluble materials were removed by filtration. Filtrate was purified with preparative HPLC (Method f) to afford PEG<sub>x</sub>-LANA-DSSMe as brown powder after lyophilization.

### PEG<sub>550</sub>-LANA-DSSMe (11)

Crude HPLC (Method C):

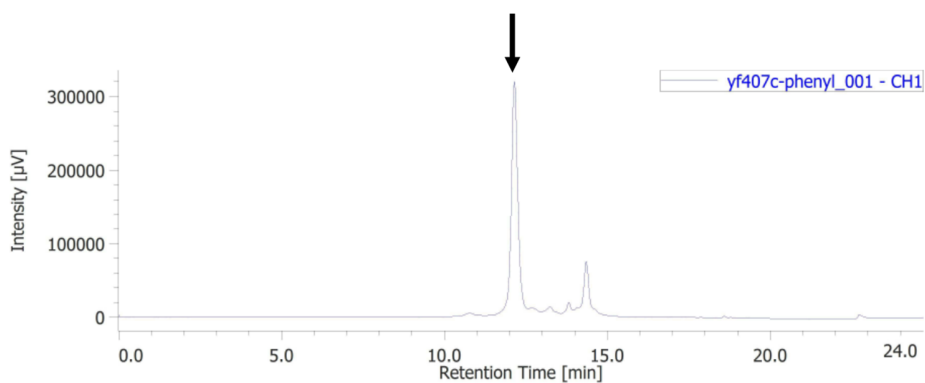

The black arrow indicates the position of the target peptide.

After HPLC separation (Method C):

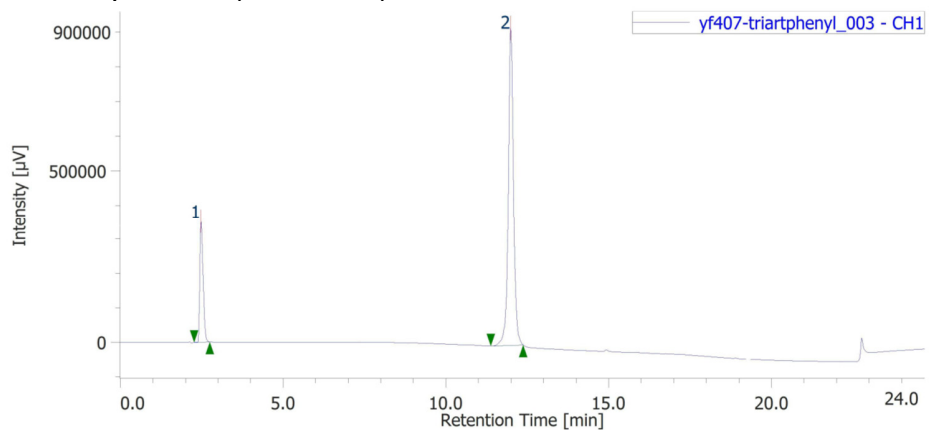

33.8 mg, 6.31 µmol, y. 79%. Retention time: 12.0 min (Method C).

ESI-MS spectrum of the product is shown below.

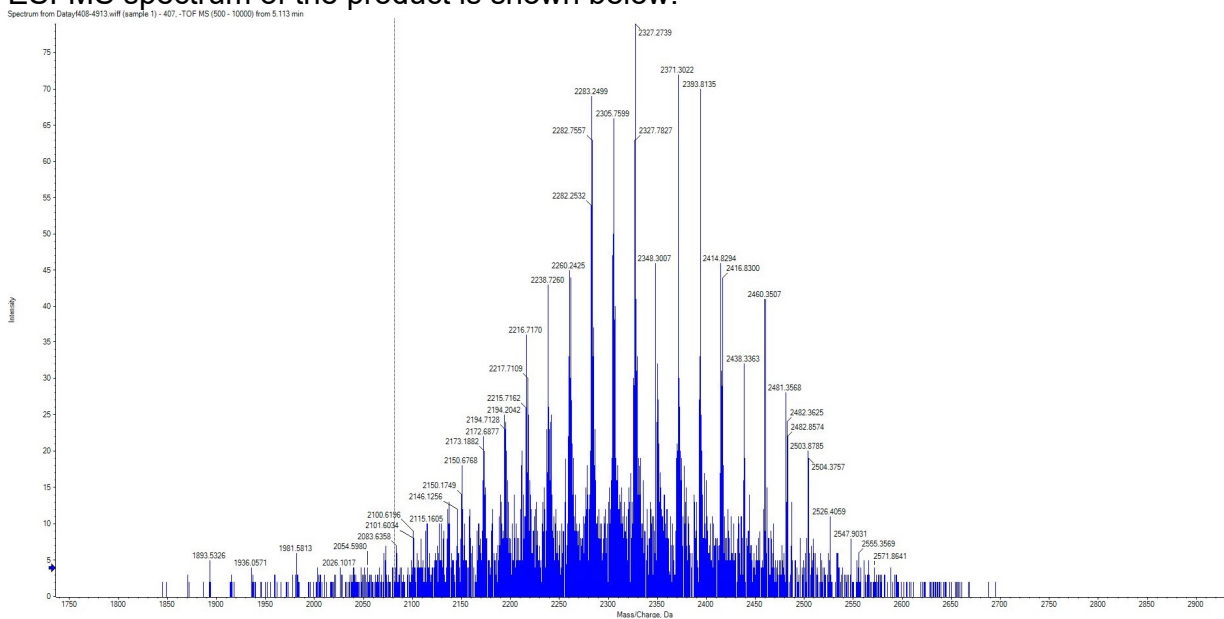

One of the peaks of the highest intensity has  $m/z$  of 2305.7, which corresponds to  $n = 11$  (Calcd: 2303.2  $[M-2H]^{2-}$ ).

**PEG<sub>750</sub>-LANA-DSSMe (12)**

Crude HPLC (Method C):

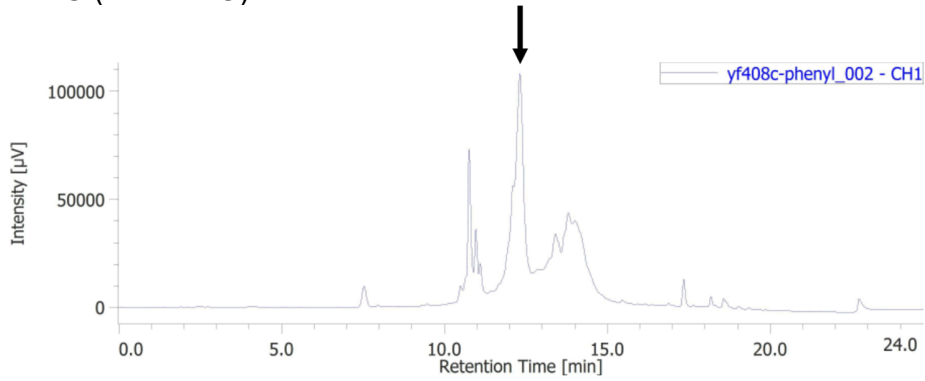

The black arrow indicates the position of the target peptide.

After HPLC separation (Method C):

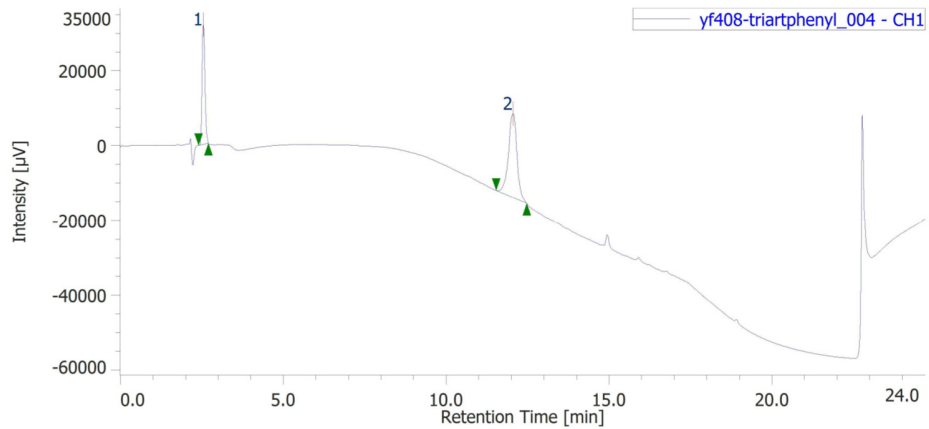

3.33 mg, 0.588  $\mu$ mol, y. 73%. Retention time: 12.1 min (Method C).

ESI-MS spectrum of the product is shown below.

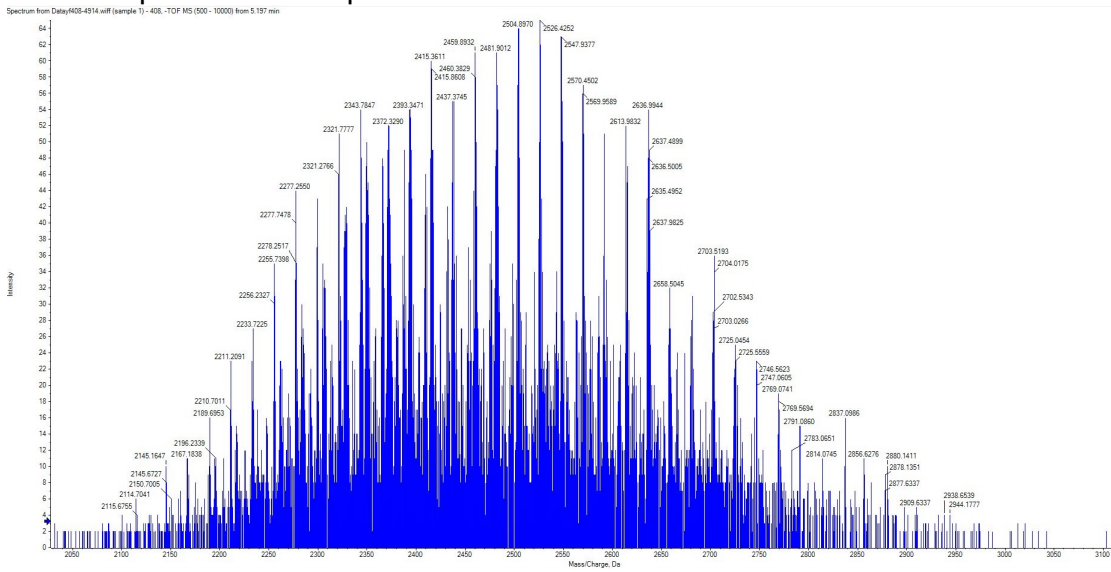

One of the peaks of the highest intensity has  $m/z$  of 2504.8, which corresponds to  $n = 14$  (Calcd: 2501.4  $[M-2H]^{2-}$ ). ESI-TOFMS  $m/z$  Calcd ( $n = 14$ ): 2501.4  $[M-2H]^{2-}$ ;

### PEG<sub>2000</sub>-LANA-DSSMe (13)

Crude HPLC (Method f):

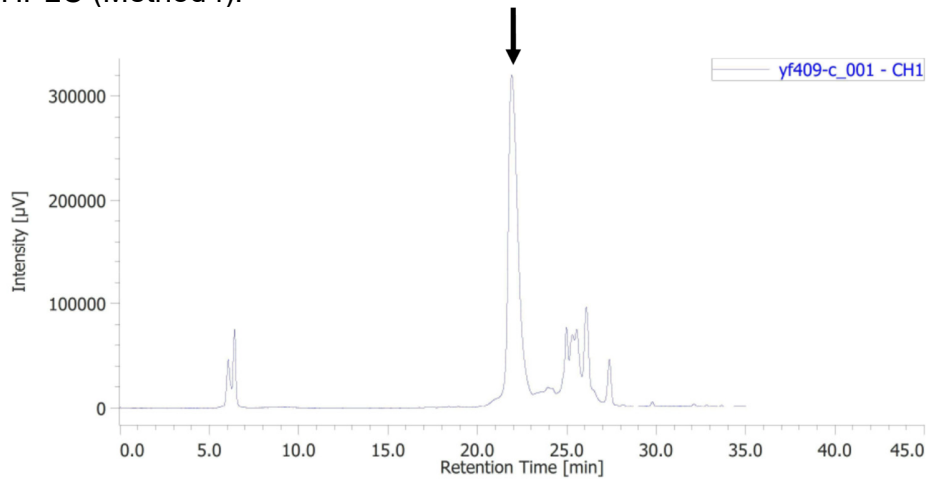

The black arrow indicates the position of the target peptide.

After HPLC separation (Method C):

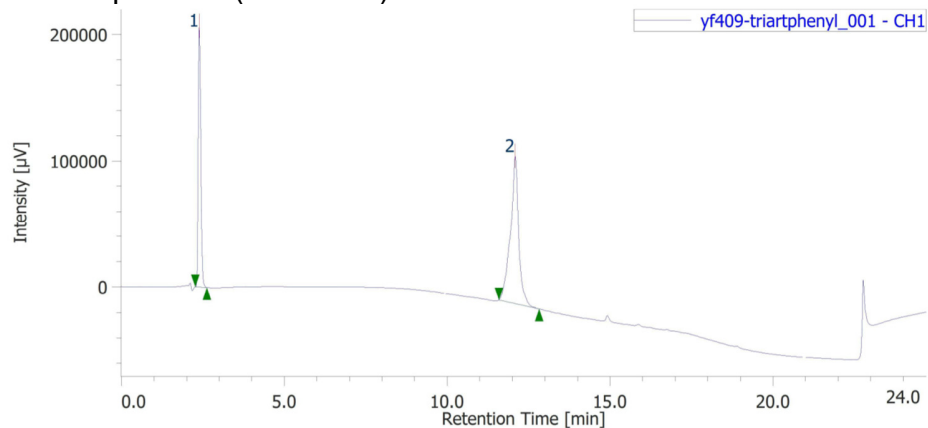

6.48 mg, 0.668 µmol, y. 84%. Retention time: 12.1 min (Method C).

ESI-MS spectrum of the product is shown below.

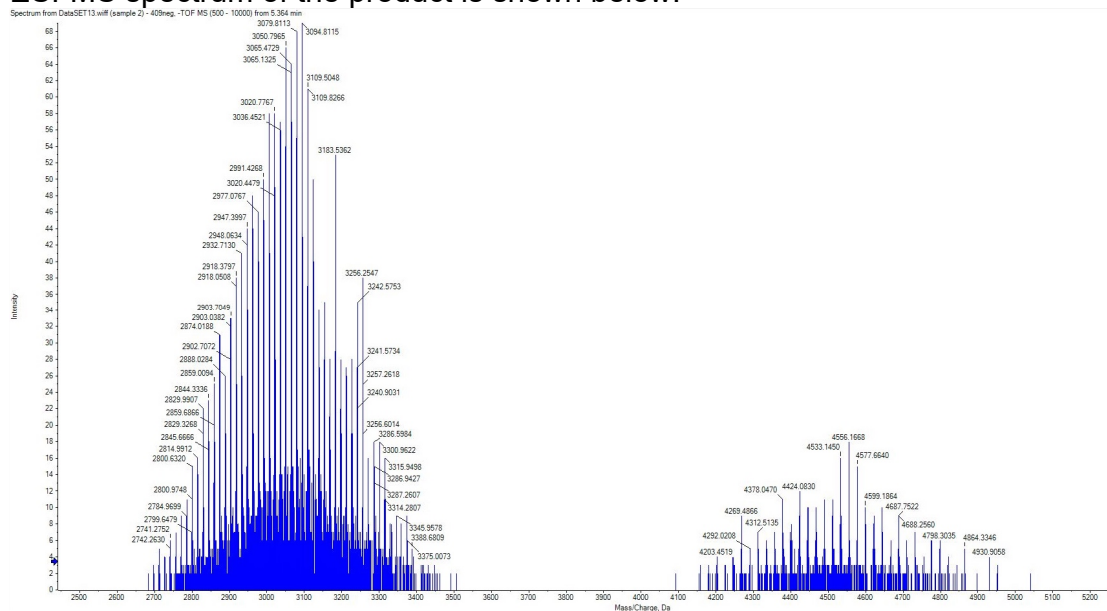

Peaks in the range of 2700–3500 are those of product trivalent anions, and peaks in the range of 4200–5000 are those of product divalent anions. For example, one of the peaks of the trivalent anions has  $m/z$  of 3079.8, which corresponds to  $n = 46$  (Calcd: 3076.7  $[M-3H]^3-$ ).



## PEG<sub>550</sub>-mutLANA-DSSMe (S20)

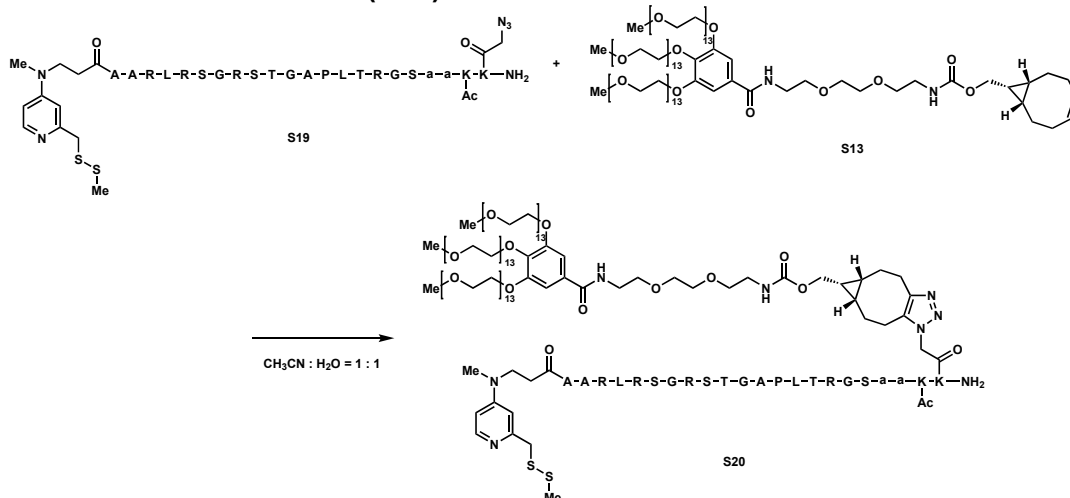

Peptide **S19** (10 mM in water, 77.2  $\mu$ L, 0.772  $\mu$ mol) and alkyne **S13** (50 mM in MeCN, 30.9  $\mu$ L, 1.54  $\mu$ mol) were mixed in water:MeCN (1:1). The mixture was stirred at r.t for 36 h, and insoluble materials were removed by filtration. Filtrate was purified with preparative HPLC (Method e) to afford **S20** (2.16 mg, 0.400  $\mu$ mol, 51.9%) as white powder after lyophilization.

Crude HPLC (Method D):

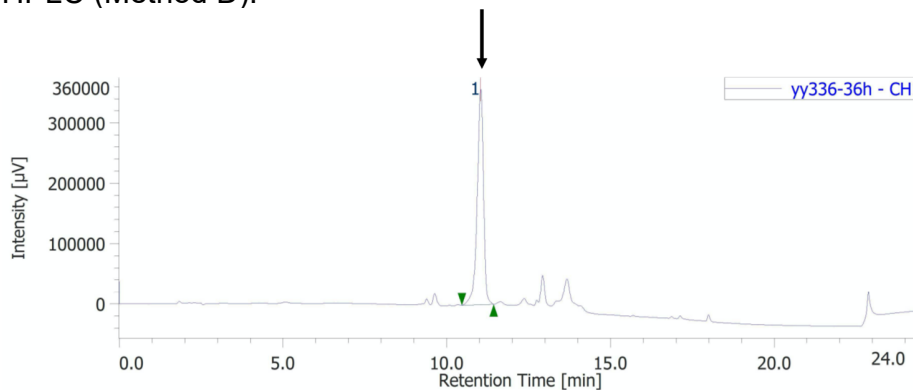

The black arrow indicates the position of the target peptide.

After HPLC separation (Method D):

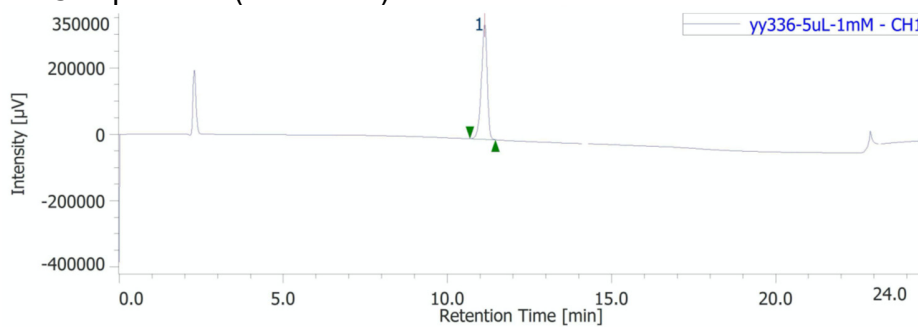

Retention time: 11.1 (Method D)

ESI-TOFMS spectrum of the product is shown below.

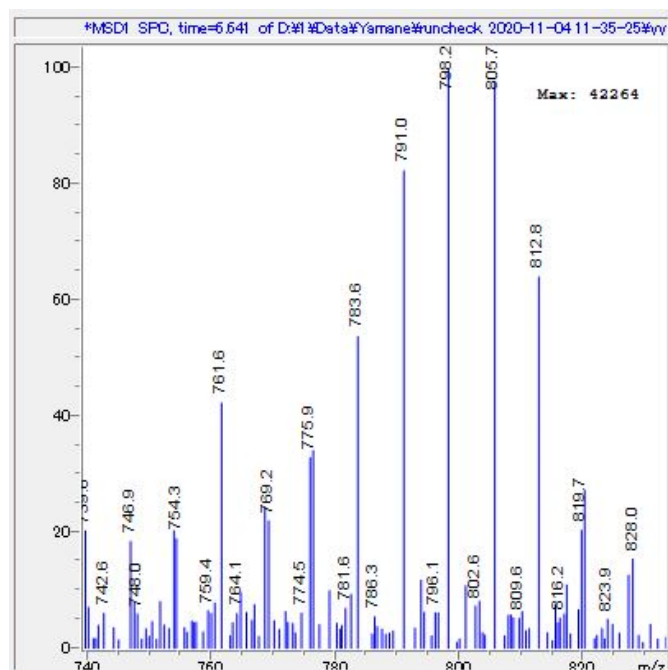

One of the peaks of the highest intensity has  $m/z$  of 805.7, which corresponds to  $n = 13$  (Calcd: 805.3  $[M+6H]^{6+}$ ).

## Method for biochemical experiments

### Electrophoresis Mobility Shift Assay

Recombinant nucleosomes (0.4  $\mu\text{M}$  for DNA/histone octamer concentration) were incubated with each concentration of PEG-LANA-FITC in 16 mM Tris-HCl (pH 7.5) buffer containing 0.8 mM DTT at 37 °C for 1 h. The samples were analyzed by non-denaturing 6% PAGE in 0.2x Tris-borate EDTA (TBE) buffer (18 mM Tris base, 18 mM boric acid, and 0.4 mM EDTA). FITC signals were detected by ImageQuant LAS 4010 and DNA was visualized by ethidium bromide staining. The fluorescence intensities of nucleosome-bound PEG-LANA-FITC were measured using Fiji/ImageJ ver. 1.51h, and subtracted by background intensity from samples without nucleosomes. The intensities were fitted with the Michaelis-Menten equation [ $I = A * x / (x + B)$ ].  $I$ , the measured intensity of FITC signals (nucleosome-bound PEG-LANA-FITC);  $A$ , the intensity when all acidic patch bind to PEG-LANA-FITC;  $B$ , the dissociation constant ( $K_d$ );  $x$ , the concentration of the PEG-LANA-FITC.

### Estimation of histone amount in living cells

$2 \times 10^6$  HeLa S3 cells were harvested by trypsinization. Histone H2A/H2B were isolated with Histone Purification Kit (Active Motif) according to the manufacturer's instructions from the cells, and dissolved in 100  $\mu\text{L}$  of 0.1 M Tris-HCl (pH7.5). 30  $\mu\text{L}$  of 5x sample buffer and 20  $\mu\text{L}$  of 1 M DTT were added. After boiling, the samples were separated by SDS-PAGE, and the gels were stained by oriole. Calibration curve was drawn by reconstituted nucleosome, and signals were measured using Fiji/ImageJ ver. 1.51h.

### Estimation of in-cell $K_d$ of PEG-LANA-FITC

In FRAP experiment, fluorescence recovery time depends on compound diffusion or binding/dissociation with histones. When the diffusion of the compound occurs negligibly fast, and the rate-determining step is the binding or dissociation of the PEG-LANA-FITC to nucleosomes, fluorescence at the bleached point,  $f(t)$  was given in Eq.(1).

$$f(t) = I_{\text{final}} \left\{ 1 - \left( \frac{k_{\text{on}} [S_{\text{eq}}]}{k_{\text{on}} [S_{\text{eq}}] + k_{\text{off}}} \right) e^{(-kt)} \right\} \dots (1)$$

$I_{\text{final}}$ , the total recovery of fluorescence;  $k$ , the binding coefficient;  $t$ , time (s);  $k_{\text{on}}$ , the binding rate constant;  $k_{\text{off}}$ , the detachment rate constant;  $[S_{\text{eq}}]$ , the concentration of free acidic patch. The dissociation constant ( $K_d$ ) is defined as shown in Eq.(2),

$$K_d = \frac{k_{\text{off}}}{k_{\text{on}}} \dots (2)$$

Insert (2) into (1),

$$f(t) = I_{\text{final}} \left\{ 1 - \left( \frac{[S_{\text{eq}}]}{[S_{\text{eq}}] + K_d} \right) e^{(-kt)} \right\} \dots (3).$$

From the FRAP experiment for PEG<sub>550</sub>-LANA-FITC 7, recovery curves were fitted as Eq.(4).

$$f(t) = 0.83 (1 - 0.53 e^{-2.5t}) \dots (4)$$

Since the concentration of **7** should be negligibly lower than that of nucleosome in the experiments,  $[S_{eq}]$  can be approximated to acidic patch concentration. As the concentration of acidic patches was estimated to be about 0.1 mM (Figure S4),  $K_d$  value of **7** in living cells was estimated to be about 0.09 mM.

**Quantification of the introduced PEG-LANA-FITCs into cells**

0.5 mM PEG-LANA-FITC in PBS was incorporated into HeLa S3 cells by bead loading (4). Then the cells were harvested with accutase, and sorted into 3 groups (high, mid, low) as described above using FACS Arial II.  $2 \times 10^4$  cells were collected, lysed in pre-chilled CRB buffer supplemented with 2 mM  $MgCl_2$ , 25 mU/ $\mu$ L Benzonase, protease inhibitor cocktail (Sigma, P2714), and 1 mM PMSF on ice for 30 min. After centrifugation (15,000 rpm for 10 min at 4 °C), the supernatants were separated by Novex™ 16% Tricine Protein Gels, and FITC signals were detected by ImageQuant LAS 4010.

## SI References

1. Shi, B., Yan, O., Tang, J., Xin, K., Zhang, J., Zhu, Y., Xu, G., Wang, R., Chen, J., Gao, W., et al. Hydrogen Sulfide-Activatable Second Near-Infrared Fluorescent Nanoassemblies for Targeted Photothermal Cancer Therapy. *Nano Lett.* **139**, 7568-7576 (2018).
2. Sui, B., Yue, X., Kim, B., and Belfield, K. D. Near-IR Two Photon Fluorescent Sensor for K<sup>+</sup> Imaging in Living Cells. *ACS Appl. Mater. Interfaces* **7**, 17565-17568 (2015).
3. Amamoto, Y., Aoi, Y., Nagashima, N., Suto, H., Yoshidome, D., Arimura, Y., Osakabe, A., Kato, D., Kurumizaka, H., Kawashima, S. A., et al. Synthetic Posttranslational Modifications: Chemical Catalyst-Driven Regioselective Histone Acylation of Native Chromatin. *J. Am. Chem. Soc.* **139**, 7568-7576 (2017).
4. Sato, Y., Stasevich, T. J., and Kimura, H. Visualizing the Dynamics of Inactive X Chromosomes in Living Cells Using Antibody-Based Fluorescent Probes. *Methods Mol. Biol.* **1861**, 91-102 (2018).

# Spectral data

C:\Documents and Settings\Administrator\ffXfNfgfbfv\Gouseifujjwaray\19\_...plyf230dmso-1-1.als

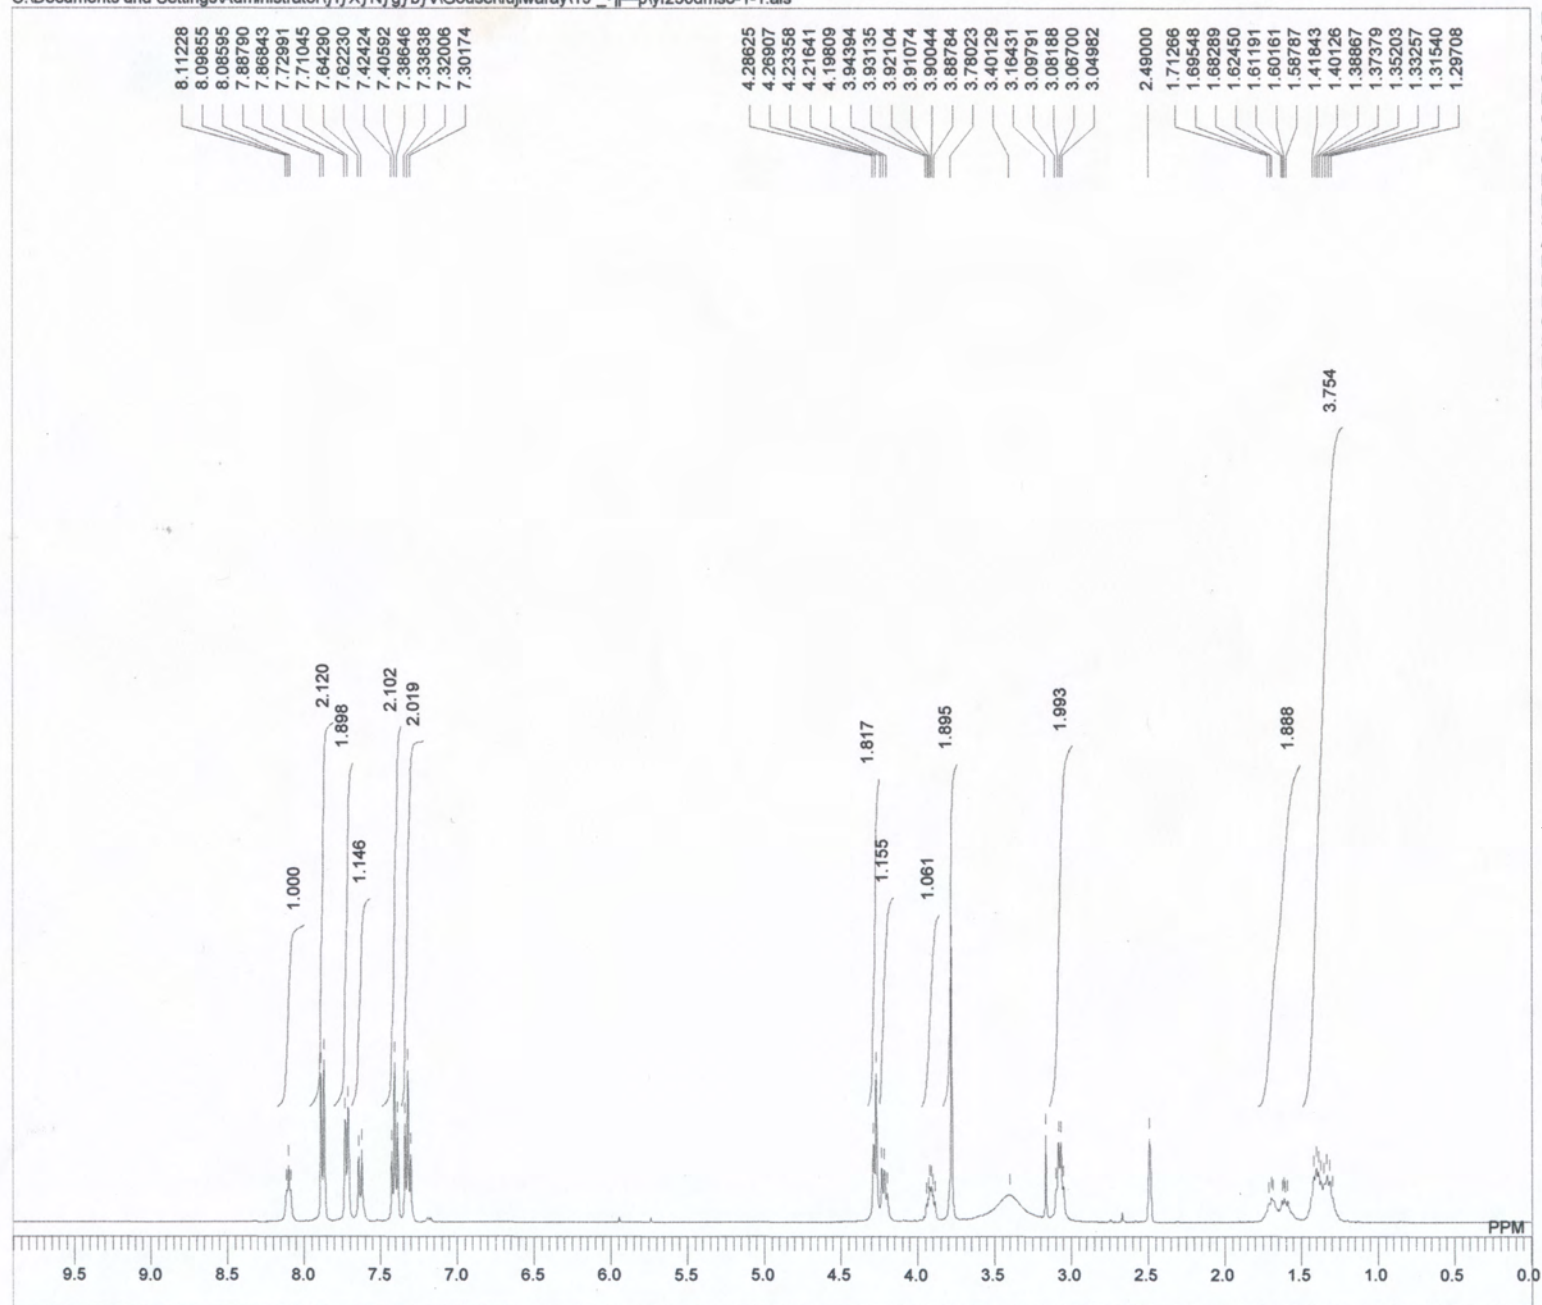

DFILE yf230dmso-1-1.als  
 COMNT  
 DATIM 22-07-2019 21:55:55  
 OBNUC 1H  
 EXMOD proton.jxp  
 OBFRQ 391.78 MHz  
 OBSET 8.51 KHz  
 OBFIN 3.34 Hz  
 POINT 13107  
 FREQU 5878.90 Hz  
 SCANS 8  
 ACQTM 2.2295 sec  
 PD 6.0000 sec  
 PW1 5.17 usec  
 IRNUC 1H  
 CTEMP 21.0 c  
 SLVNT DMSO  
 EXREF 2.49 ppm  
 BF 0.12 Hz  
 RGAIN 28

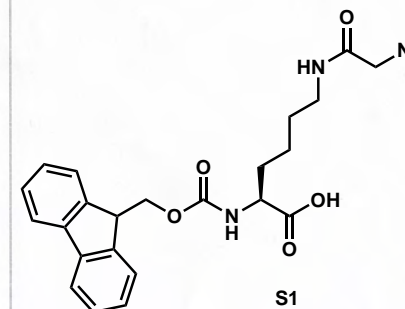

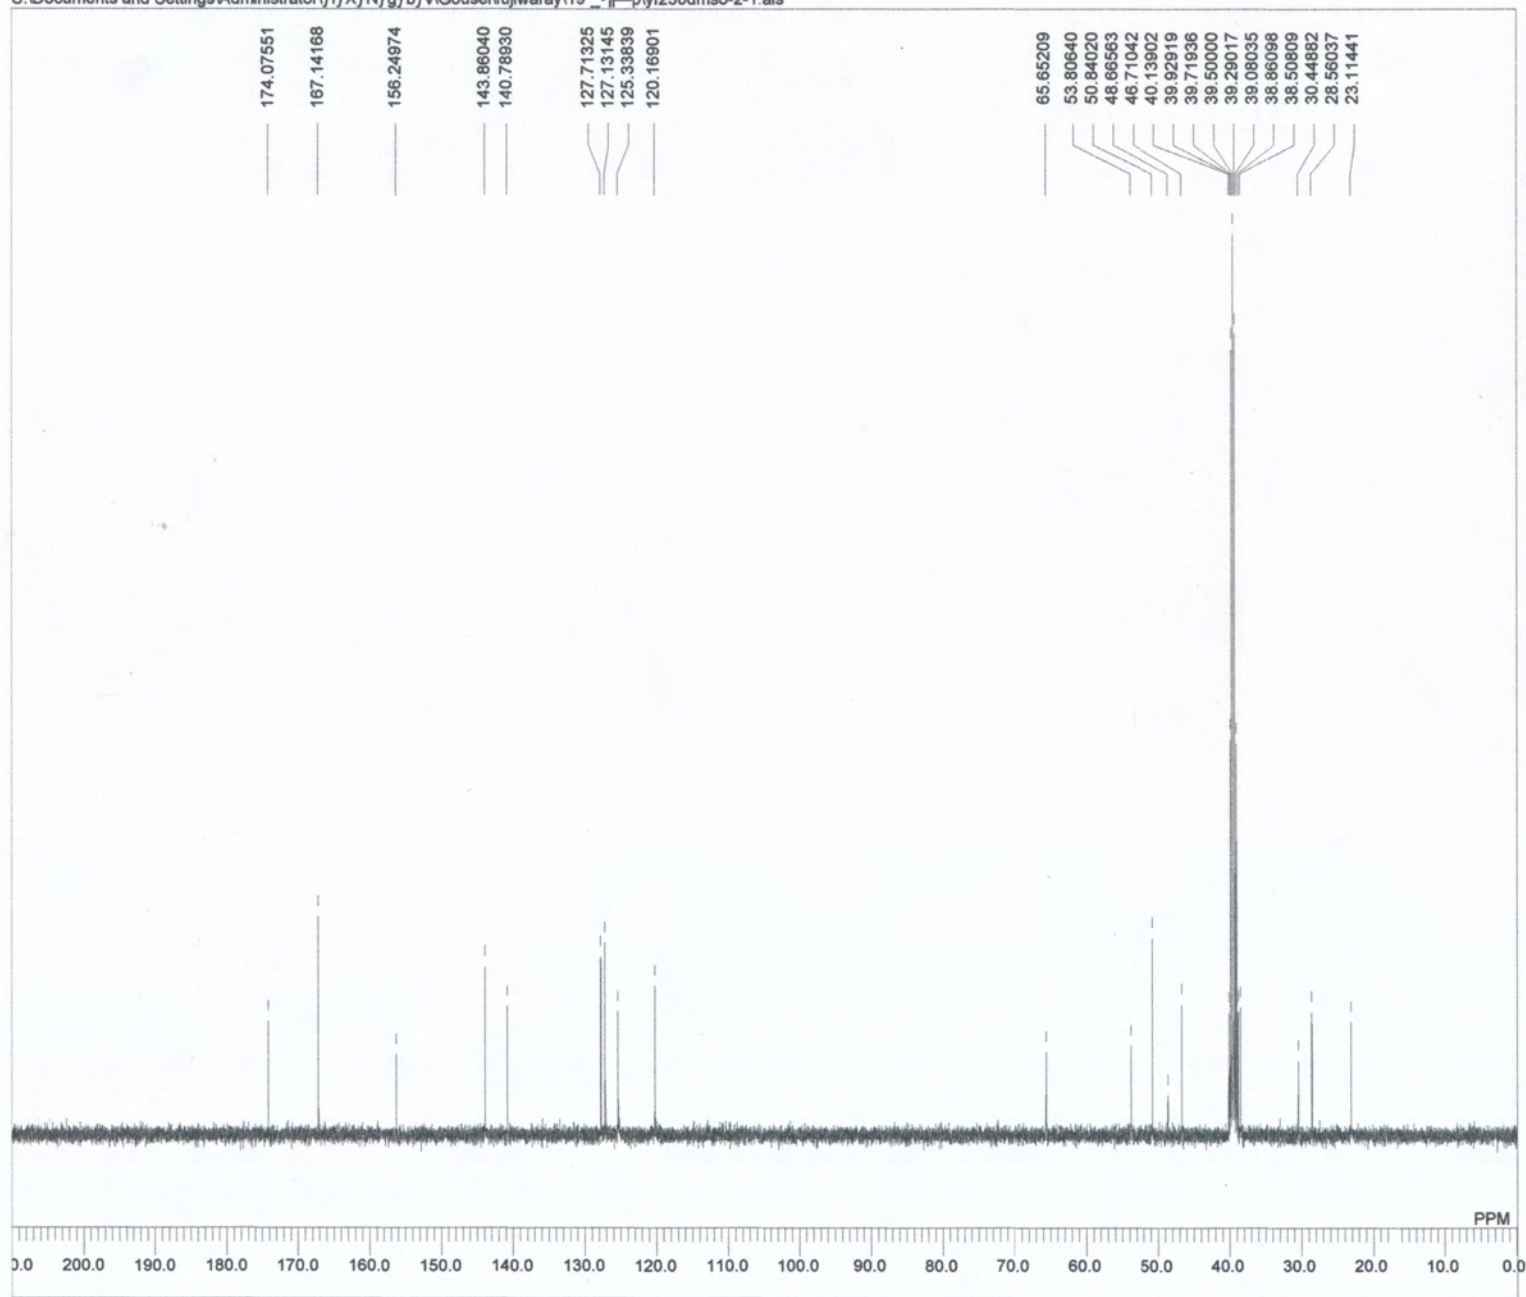

DFILE yf230dms0-2-1.als  
 COMNT  
 DATIM 22-07-2019 22:04:44  
 OBNUC 13C  
 EXMOD carbon.jxp  
 OBFRQ 98.52 MHz  
 OBSFET 4.64 KHz  
 OBFIN 8.74 Hz  
 POINT 26214  
 FREQU 24630.54 Hz  
 SCANS 139  
 ACQTM 1.0643 sec  
 PD 2.0000 sec  
 PW1 3.12 usec  
 IRNUC 1H  
 CTEMP 21.0 c  
 SLVNT DMSO  
 EXREF 39.50 ppm  
 BF 0.12 Hz  
 RGAIN 60

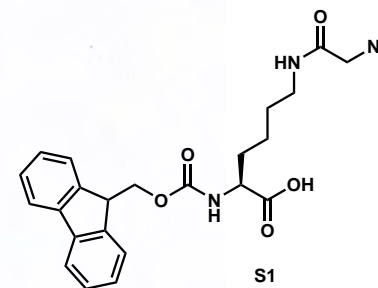



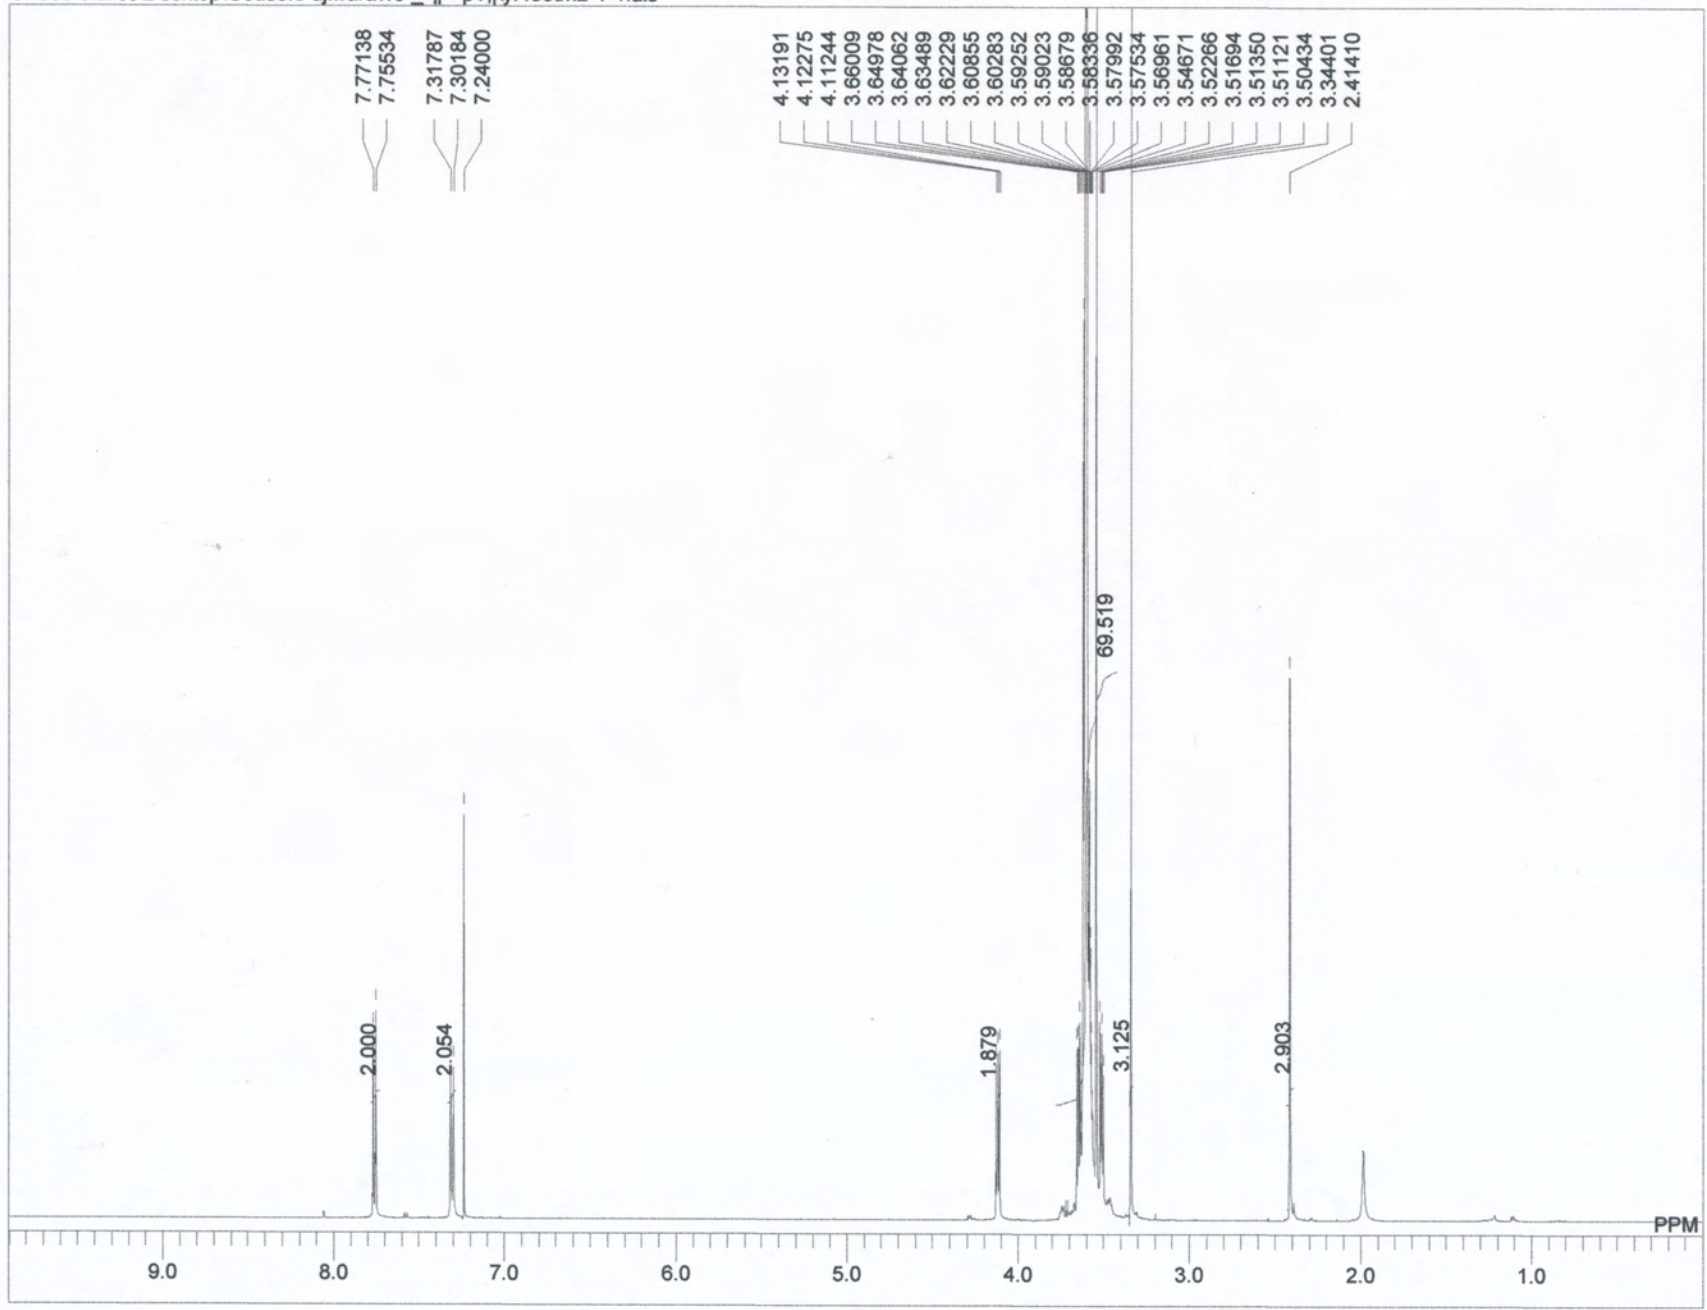

DFILE yf436tm2-1-1.als  
 COMNT  
 DATIM 2019-08-05 12:39:19  
 OBNUC 1H  
 EXMOD proton.jxp  
 OBFRQ 500.16 MHz  
 OBSET 2.41 KHz  
 OBFIN 6.01 Hz  
 POINT 13107  
 FREQU 7507.51 Hz  
 SCANS 8  
 ACQTM 1.7459 sec  
 PD 6.0000 sec  
 PW1 5.55 usec  
 IRNUC 1H  
 CTEMP 21.9 c  
 SLVNT CDCL3  
 EXREF 7.24 ppm  
 BF 0.12 Hz  
 RGAIN 34

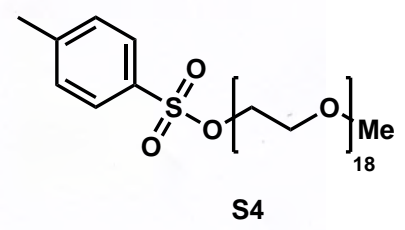



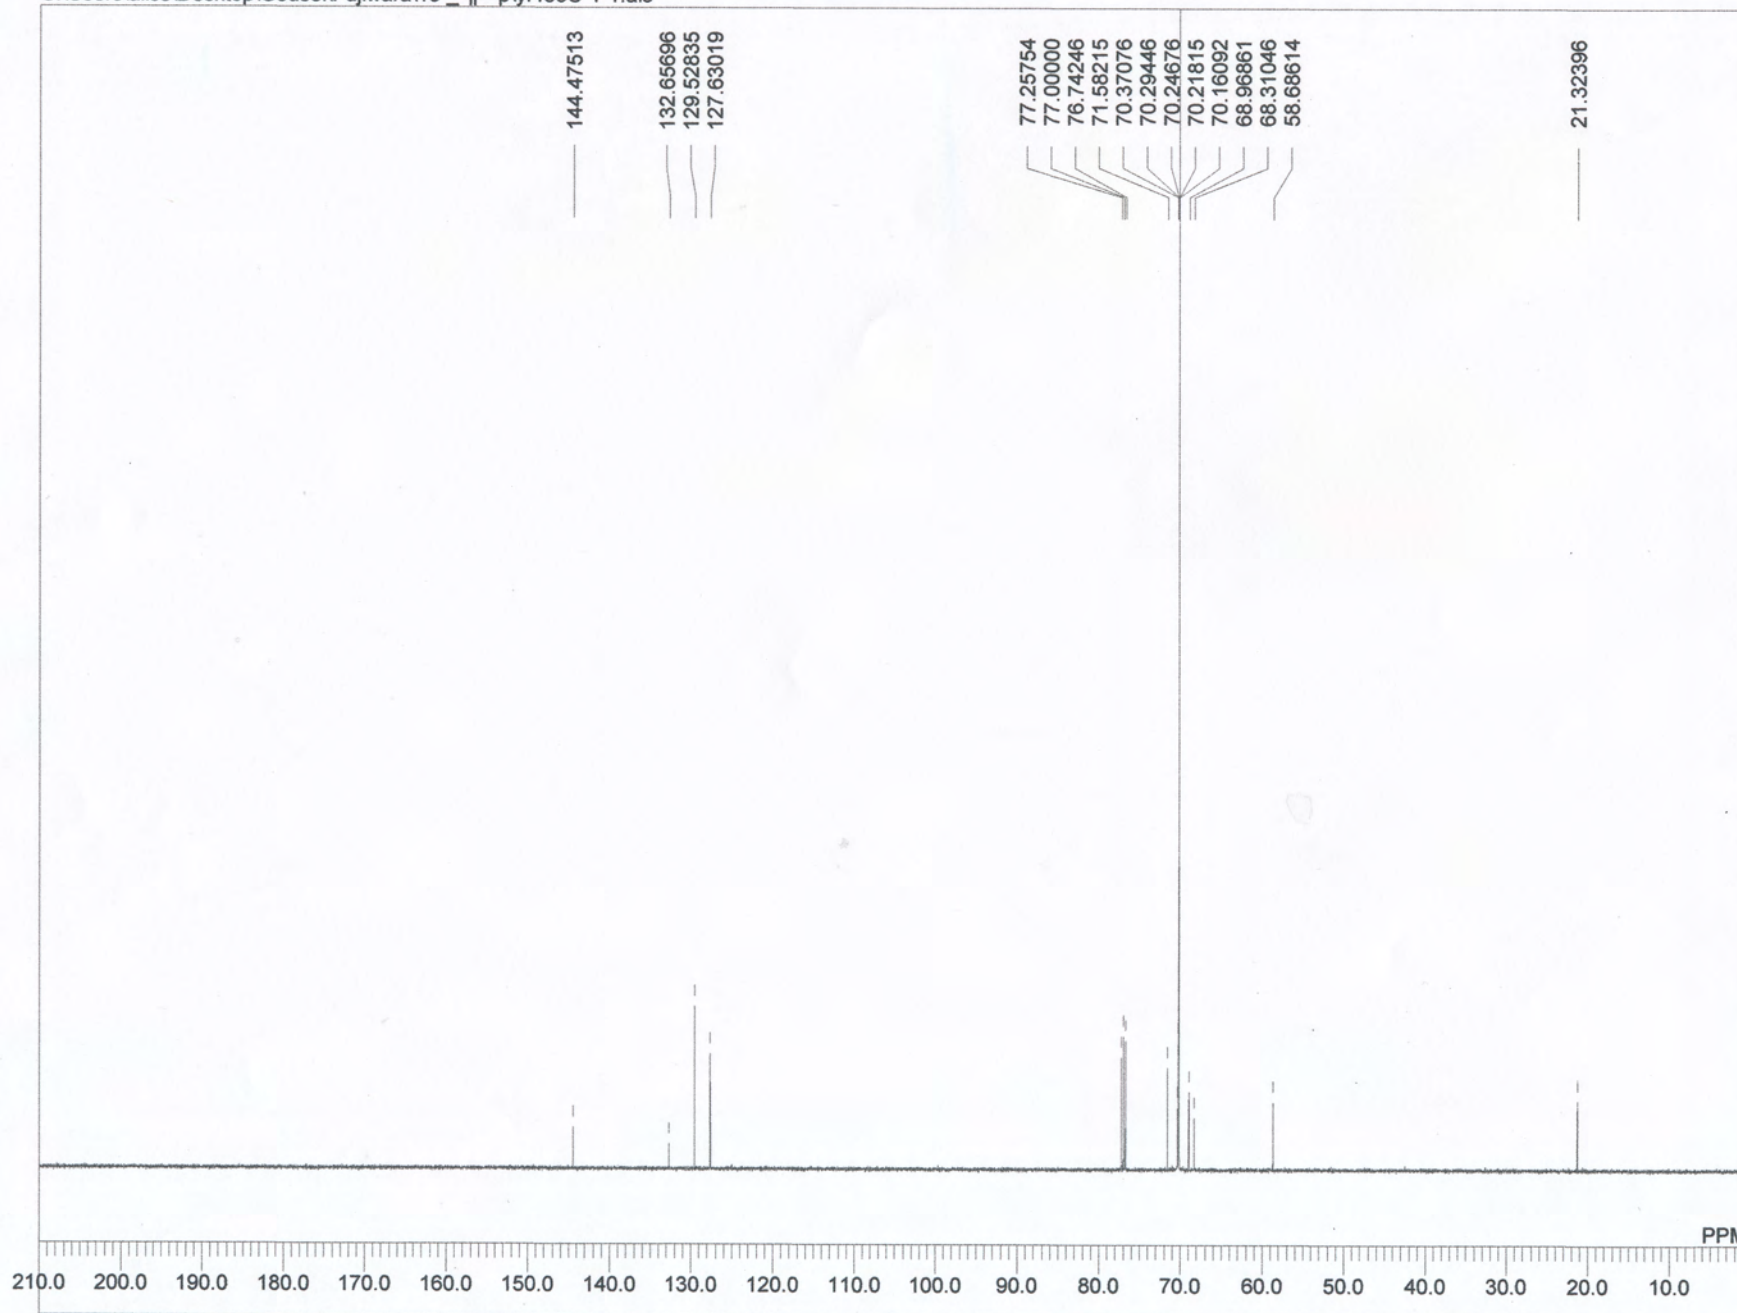

DFILE yf436C-1-1.als  
 COMNT  
 DATIM 2019-09-09 20:09:21  
 OBNUC 13C  
 EXMOD carbon.jpg  
 OBFREQ 125.77 MHz  
 OBSET 7.87 KHz  
 OBFIN 4.21 Hz  
 POINT 26214  
 FREQU 31446.54 Hz  
 SCANS 69  
 ACQTM 0.8336 sec  
 PD 2.0000 sec  
 PW1 3.40 usec  
 IRNUC 1H  
 CTEMP 21.9 c  
 SLVNT CDCL3  
 EXREF 77.00 ppm  
 BF 0.12 Hz  
 RGAIN 60

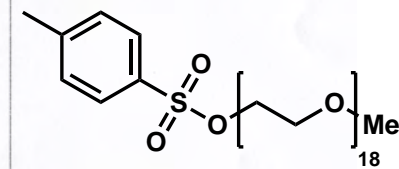

S4

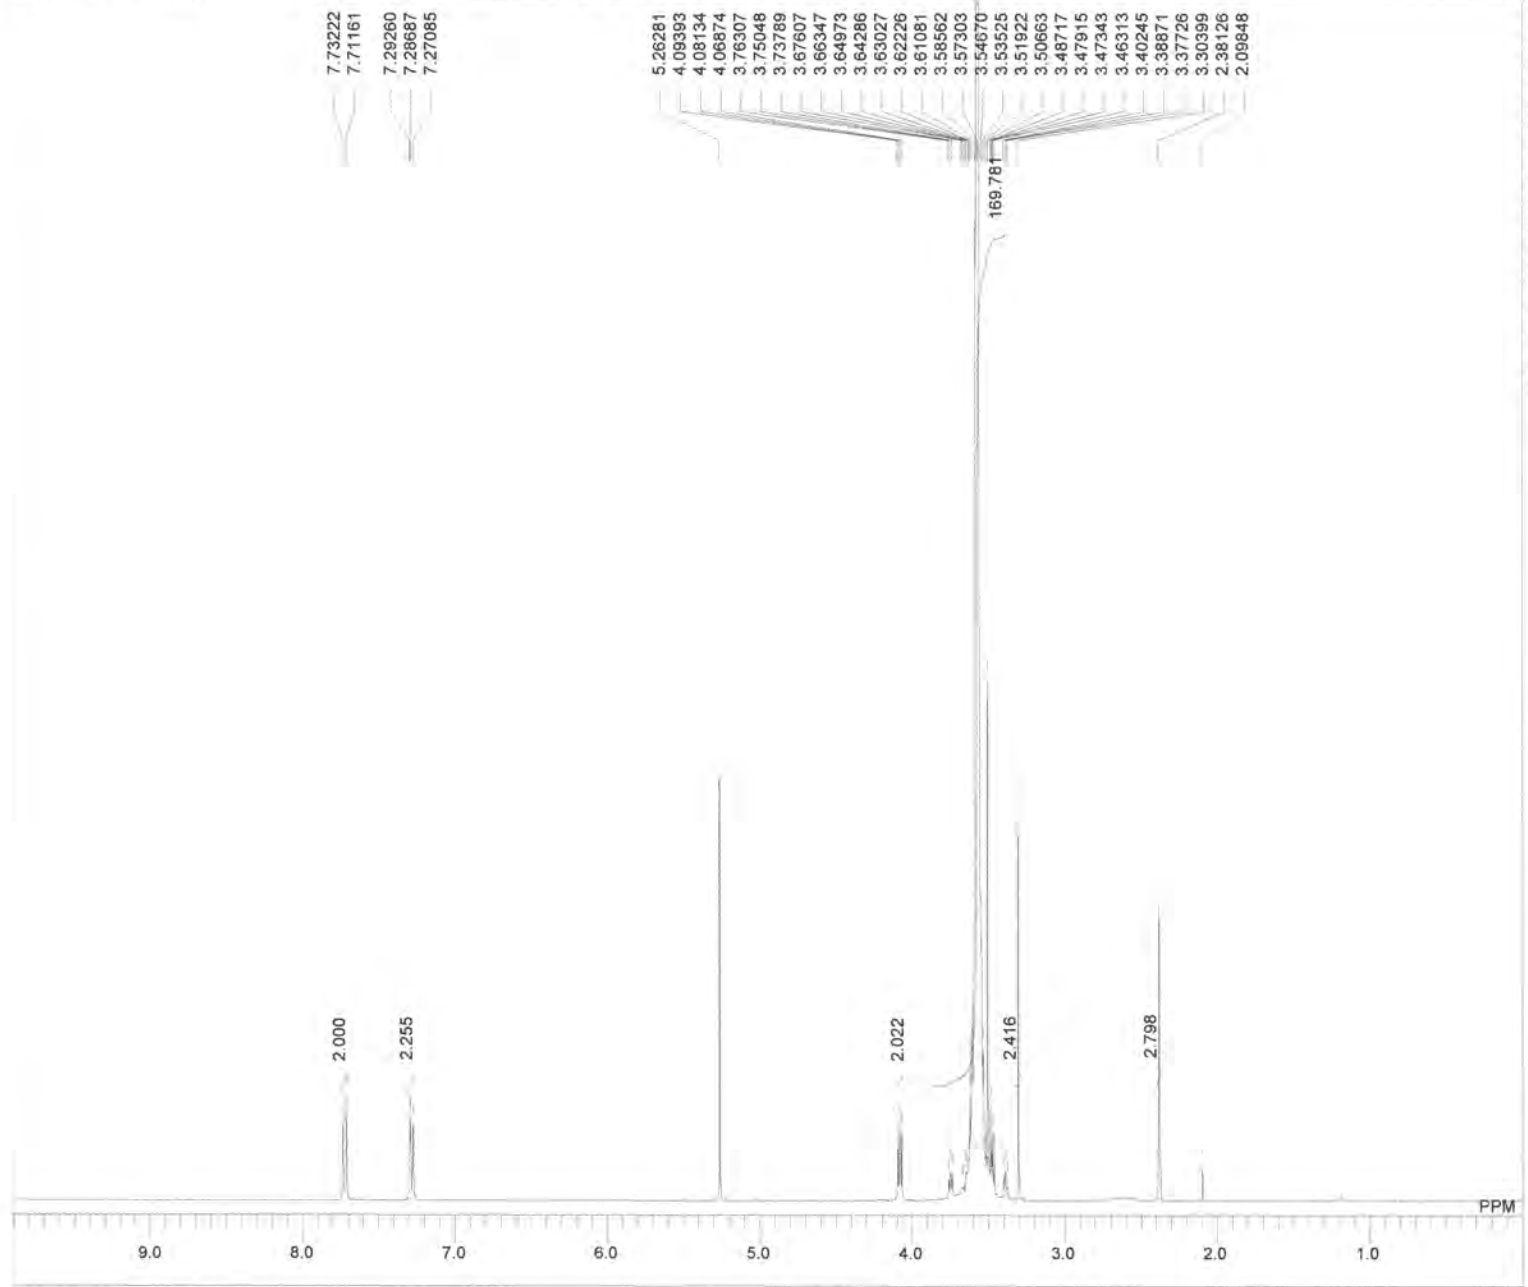

DFILE yf442TM-1-1.als  
COMNT  
DATIM 10-08-2019 23:47:35  
OBNUC 1H  
EXMOD proton.jxp  
OBFRQ 391.78 MHz  
OBSET 8.51 KHz  
OBFIN 3.34 Hz  
POINT 13107  
FREQU 5878.90 Hz  
SCANS 8  
ACQTM 2.2295 sec  
PD 6.0000 sec  
PW1 5.17 usec  
IRNUC 1H  
CTEMP 20.9 c  
SLVNT CDCL3  
EXREF 0.00 ppm  
BF 0.12 Hz  
RGAIN 18

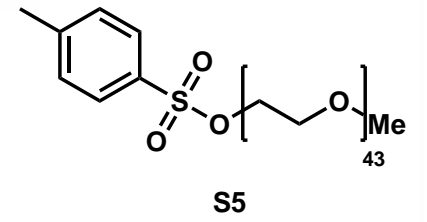







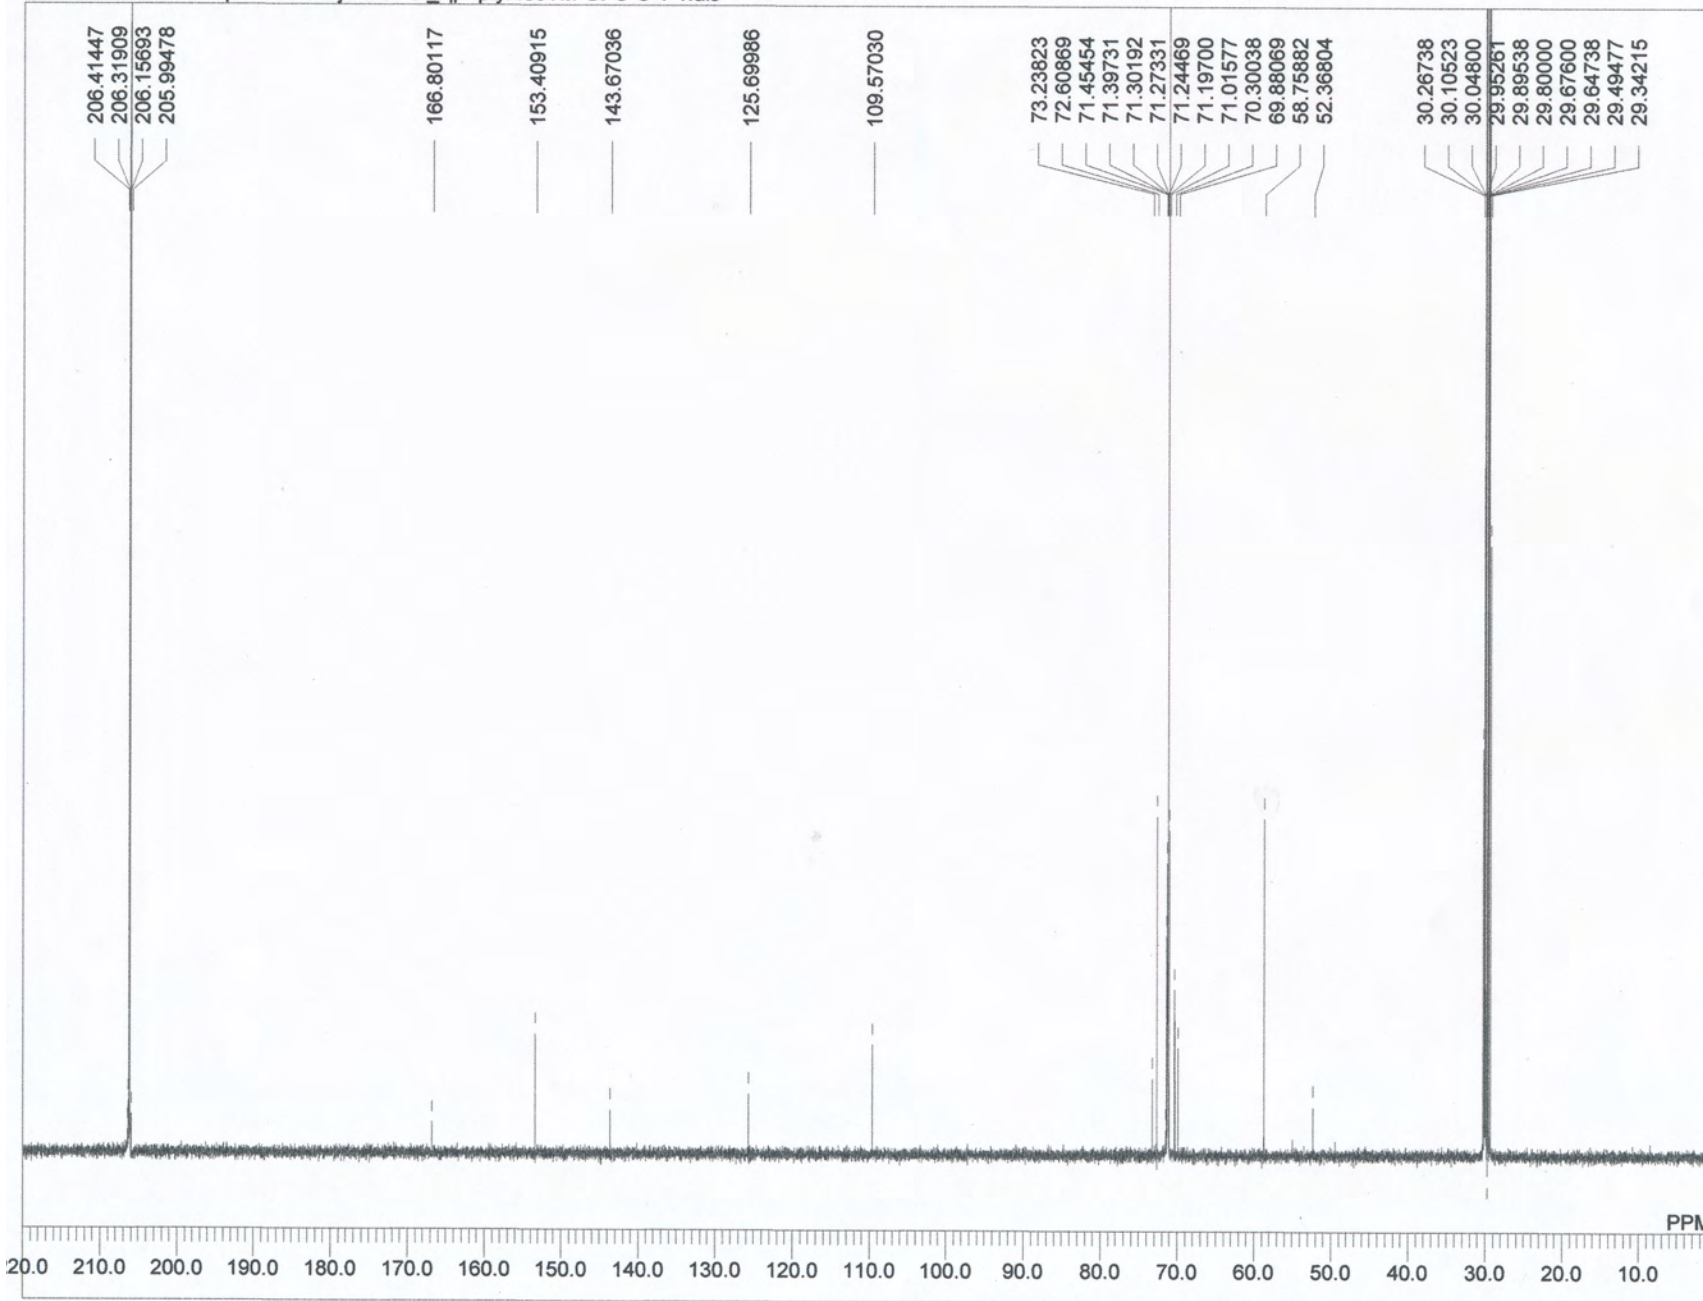

DFILE yf430TM-GPC-C-1-1.  
 COMNT  
 DATIM 2019-08-06 21:57:56  
 OBNUC 13C  
 EXMOD carbon.jxp  
 OBFRQ 125.77 MHz  
 OBSET 7.87 KHz  
 OBFIN 4.21 Hz  
 POINT 26214  
 FREQU 31446.54 Hz  
 SCANS 1051  
 ACQTM 0.8336 sec  
 PD 2.0000 sec  
 PW1 3.40 usec  
 IRNUC 1H  
 CTEMP 22.2 c  
 SLVNT ACETN  
 EXREF 29.80 ppm  
 BF 0.12 Hz  
 RGAIN 60

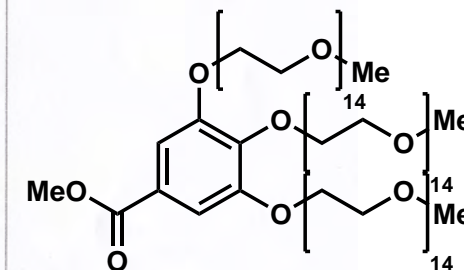

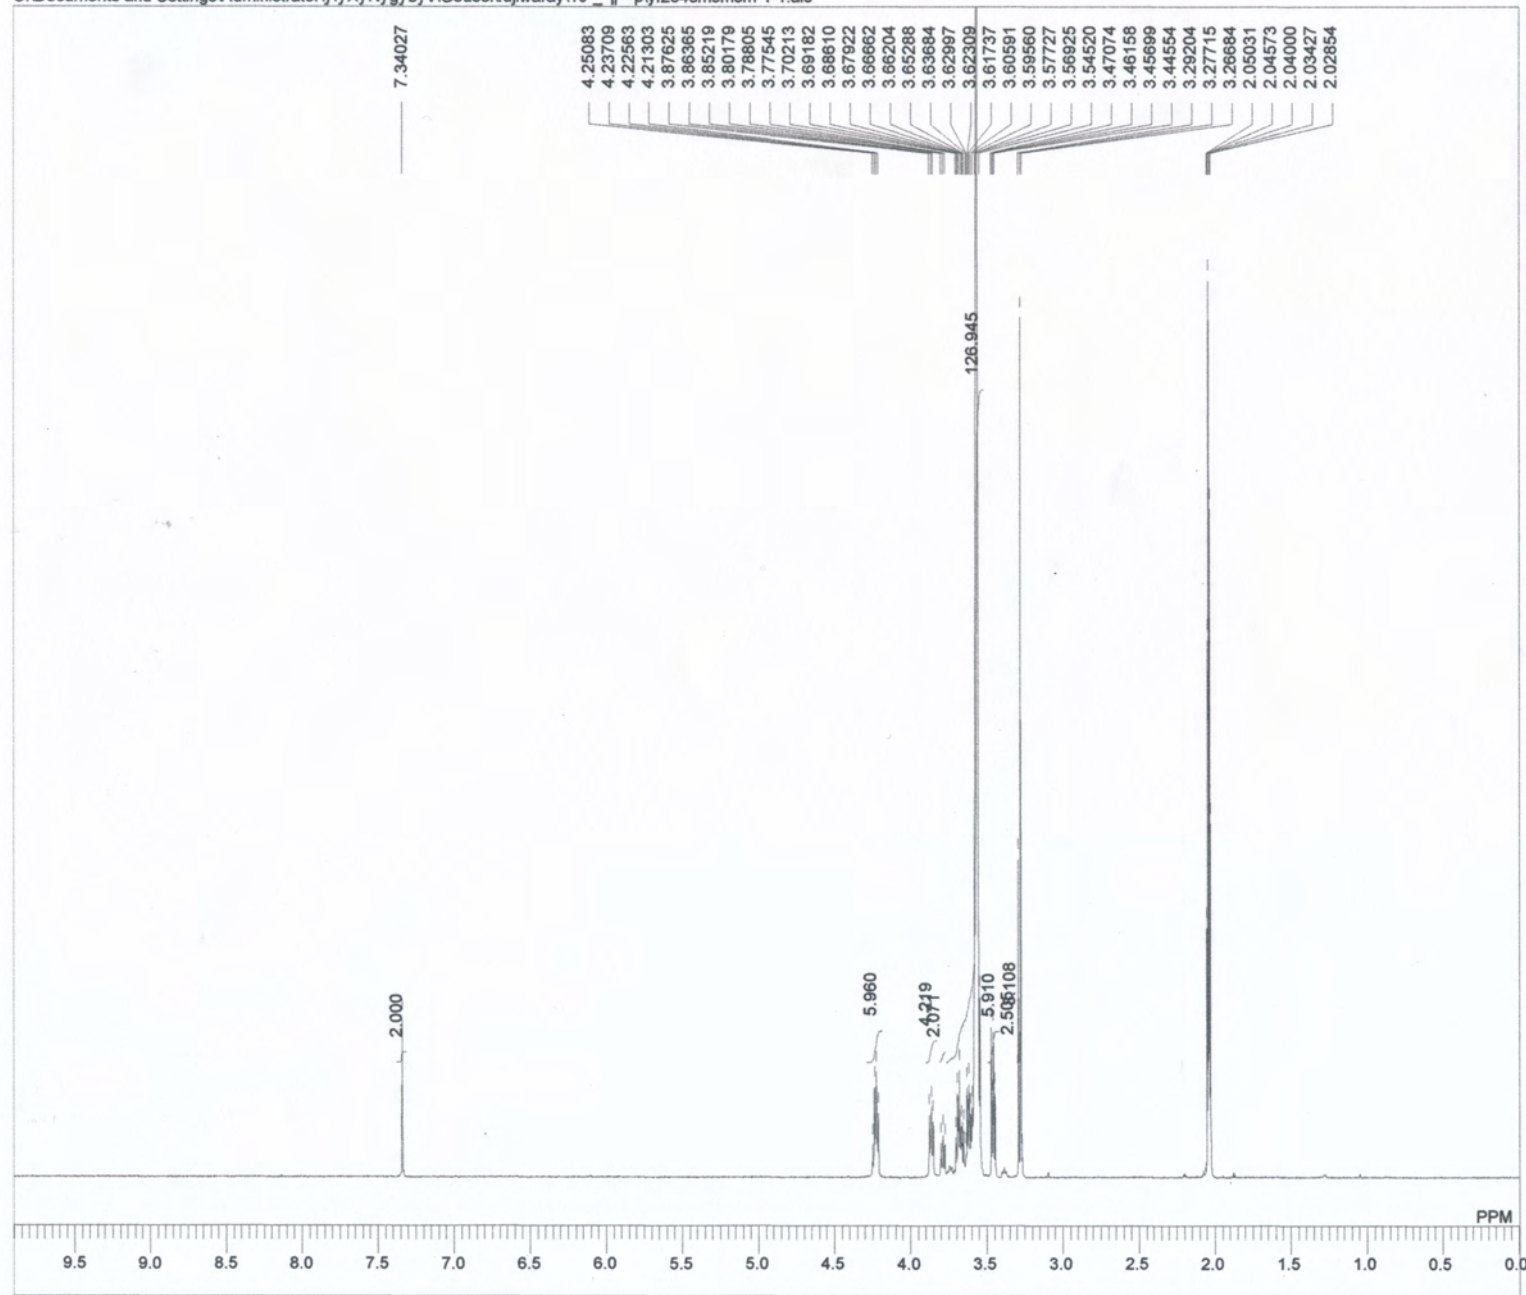

DFILE yf234smsmsm-1-1.als  
COMNT  
DATIM 31-01-2018 19:25:32  
OBNUC 1H  
EXMOD proton.jxp  
OBFRQ 391.78 MHz  
OBSET 8.51 KHz  
OBFIN 3.34 Hz  
POINT 13107  
FREQU 5882.35 Hz  
SCANS 8  
ACQTM 2.2282 sec  
PD 5.0000 sec  
PW1 5.22 usec  
IRNUC 1H  
CTEMP 20.4 c  
SLVNT ACETN  
EXREF 2.04 ppm  
BF 0.12 Hz  
RGAIN 42

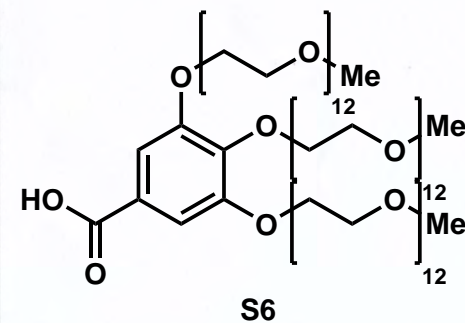

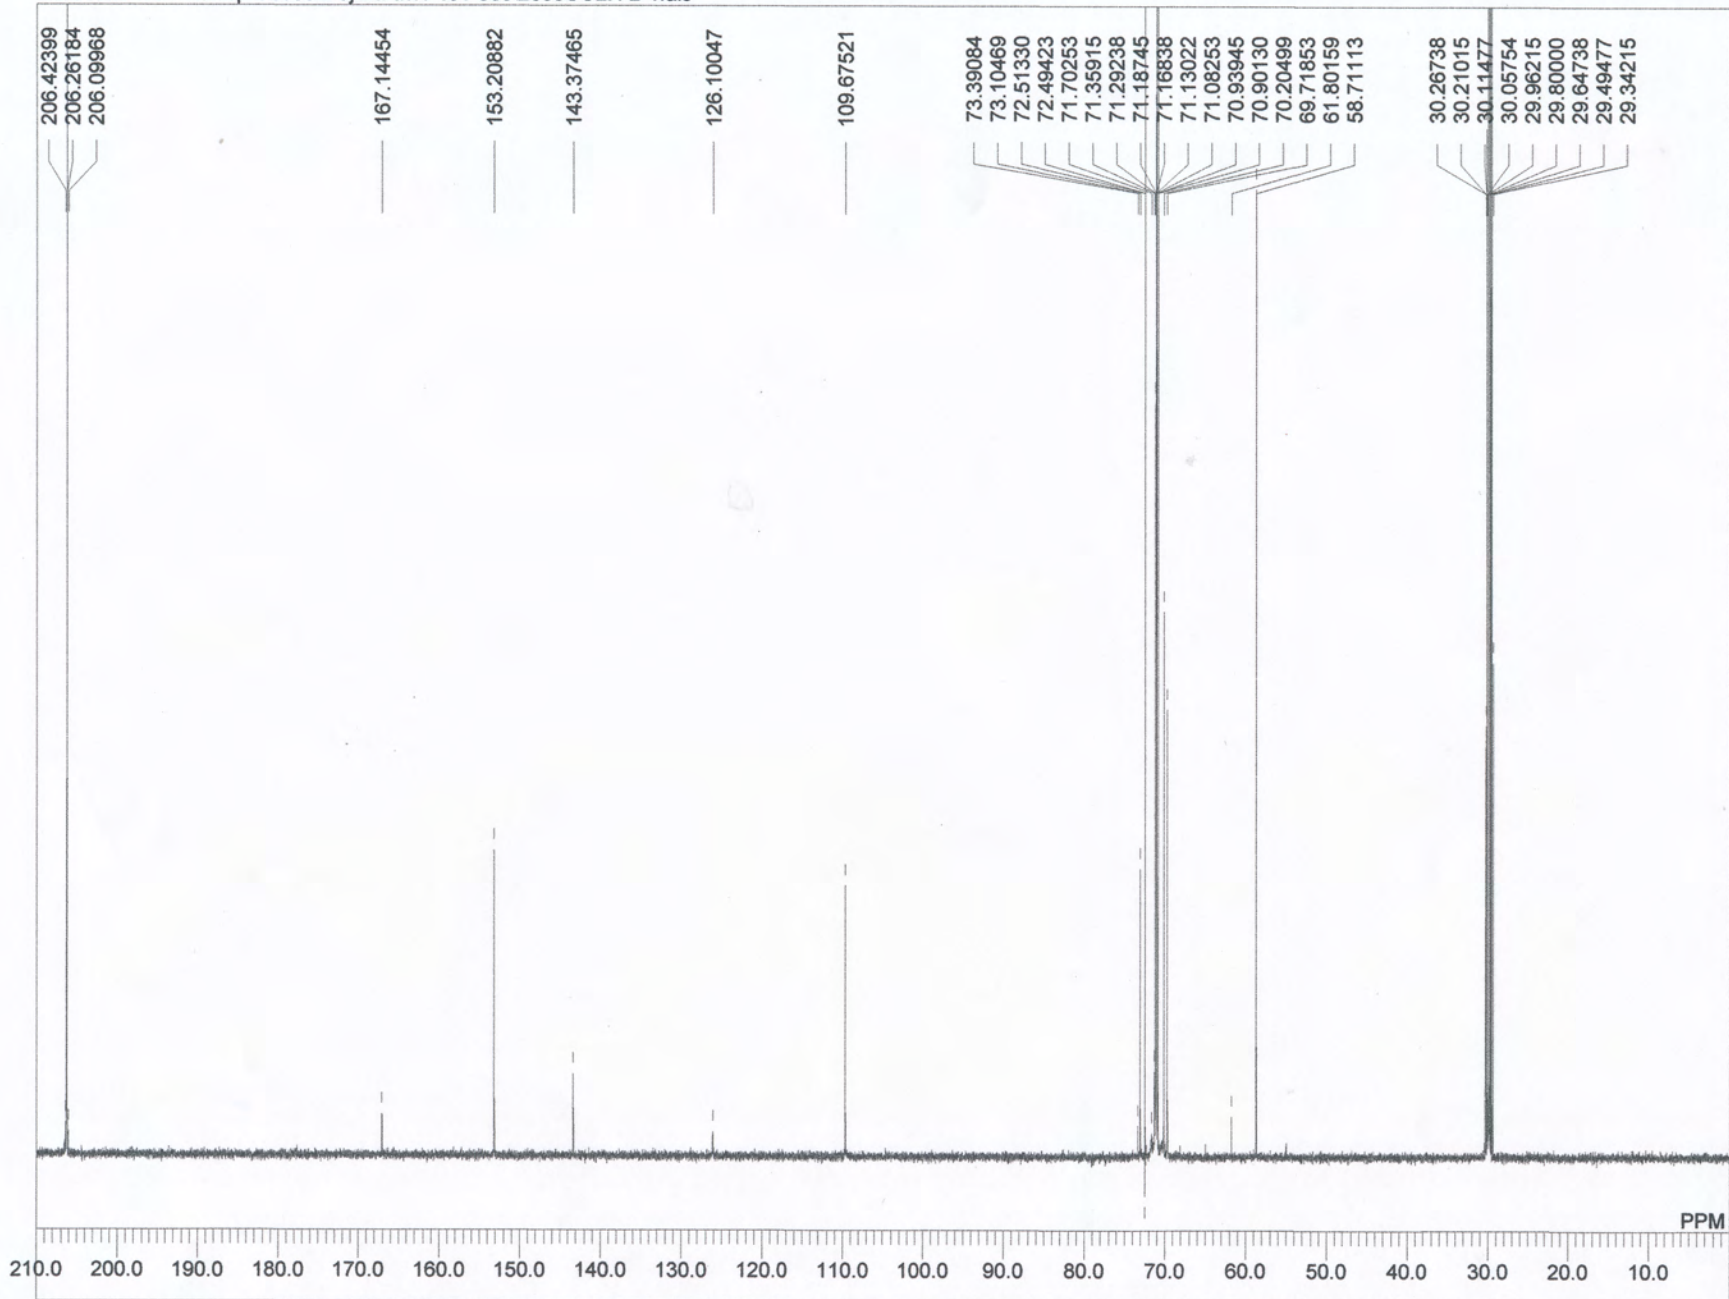

DFILE 2000CO2H-2-1.als  
 COMNT  
 DATIM 2019-09-12 16:35:30  
 OBNUC 13C  
 EXMOD carbon.jxp  
 OBFRQ 125.77 MHz  
 OBSET 7.87 KHz  
 OBFIN 4.21 Hz  
 POINT 26214  
 FREQU 31446.54 Hz  
 SCANS 1013  
 ACQTM 0.8336 sec  
 PD 2.0000 sec  
 PW1 3.40 usec  
 IRNUC 1H  
 CTEMP 22.0 c  
 SLVNT ACETN  
 EXREF 29.80 ppm  
 BF 0.12 Hz  
 RGAIN 58

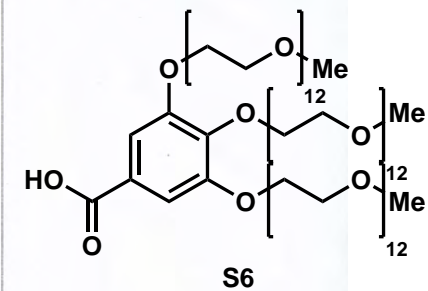



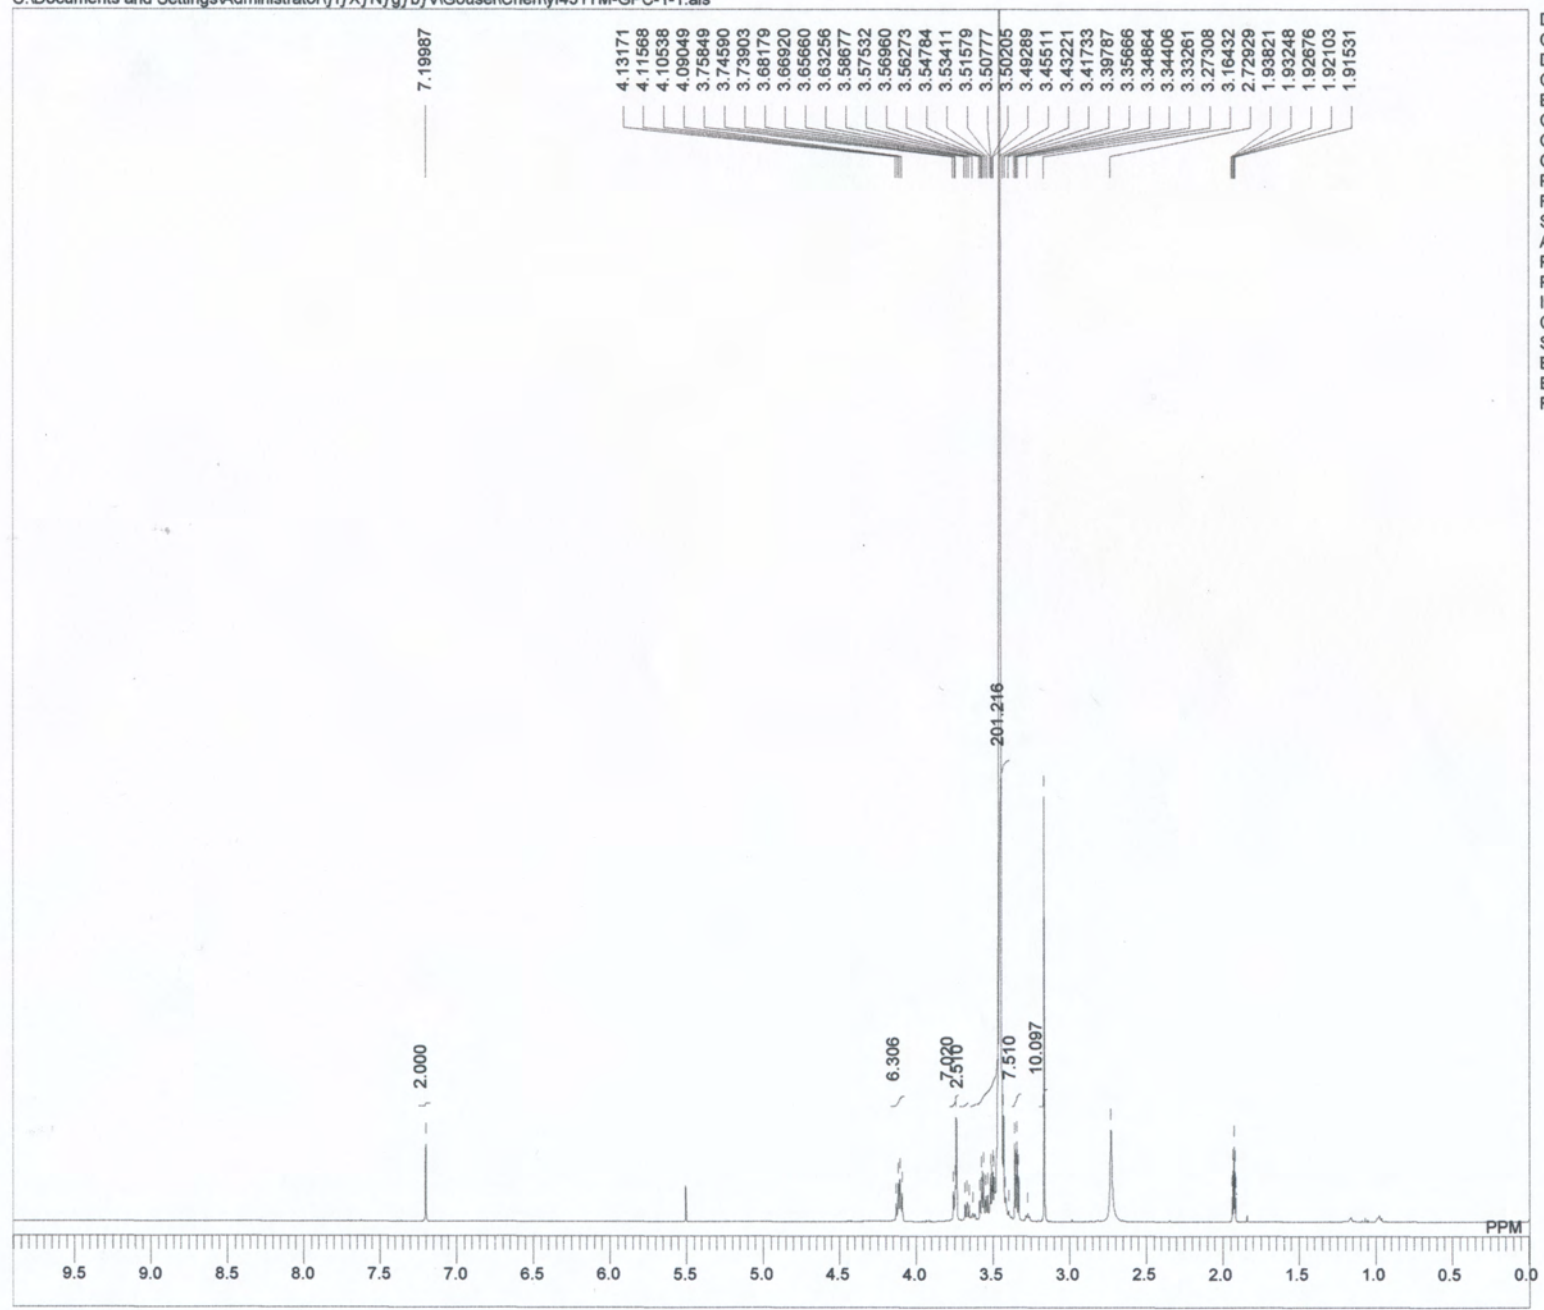

DFILE yf431TM-GPC-1-1.als  
 COMNT  
 DATIM 06-08-2019 22:23:45  
 OBNUC 1H  
 EXMOD proton.jxp  
 OBFREQ 391.78 MHz  
 OBSET 8.51 KHz  
 OBFIN 3.34 Hz  
 POINT 13107  
 FREQU 5878.90 Hz  
 SCANS 8  
 ACQTM 2.2295 sec  
 PD 6.0000 sec  
 PW1 5.17 usec  
 IRNUC 1H  
 CTEMP 20.9 c  
 SLVNT ACETN  
 EXREF 0.00 ppm  
 BF 0.12 Hz  
 RGAIN 26

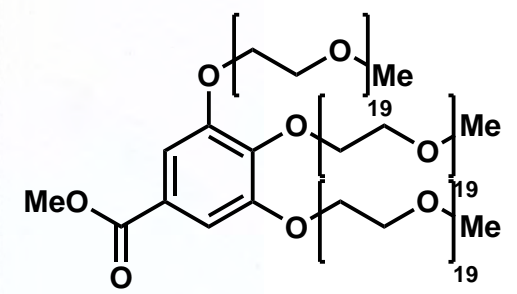



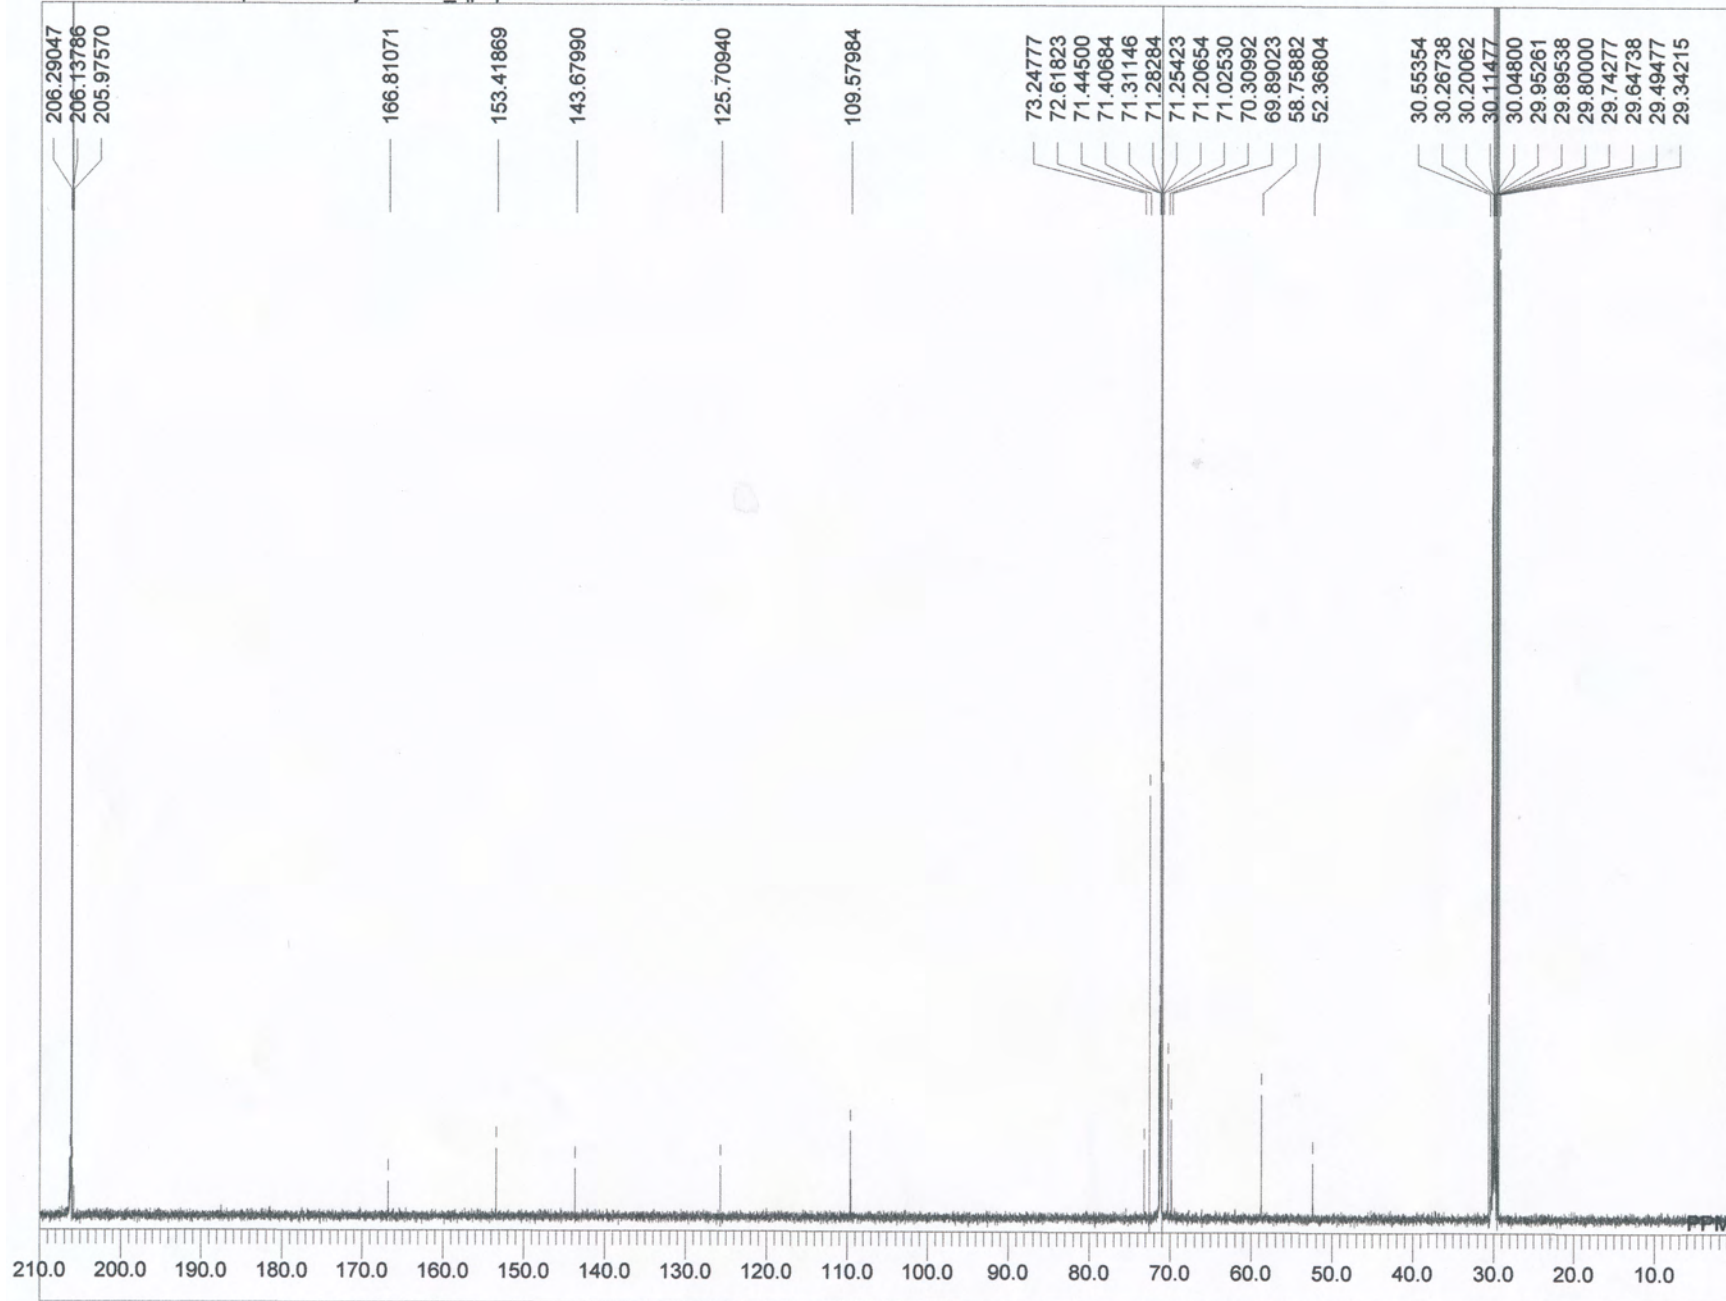

DFILE 750-CO2Me-C13.als  
 COMNT  
 DATIM 2019-09-11 16:24:10  
 OBNUC 13C  
 EXMOD carbon.jpg  
 OBFRQ 125.77 MHz  
 OBSET 7.87 KHz  
 OBFIN 4.21 Hz  
 POINT 26214  
 FREQU 31446.54 Hz  
 SCANS 2499  
 ACQTM 0.8336 sec  
 PD 2.0000 sec  
 PW1 3.40 usec  
 IRNUC 1H  
 CTEMP 21.9 c  
 SLVNT ACETN  
 EXREF 29.80 ppm  
 BF 0.12 Hz  
 RGAIN 60

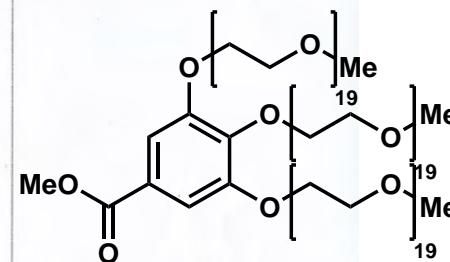

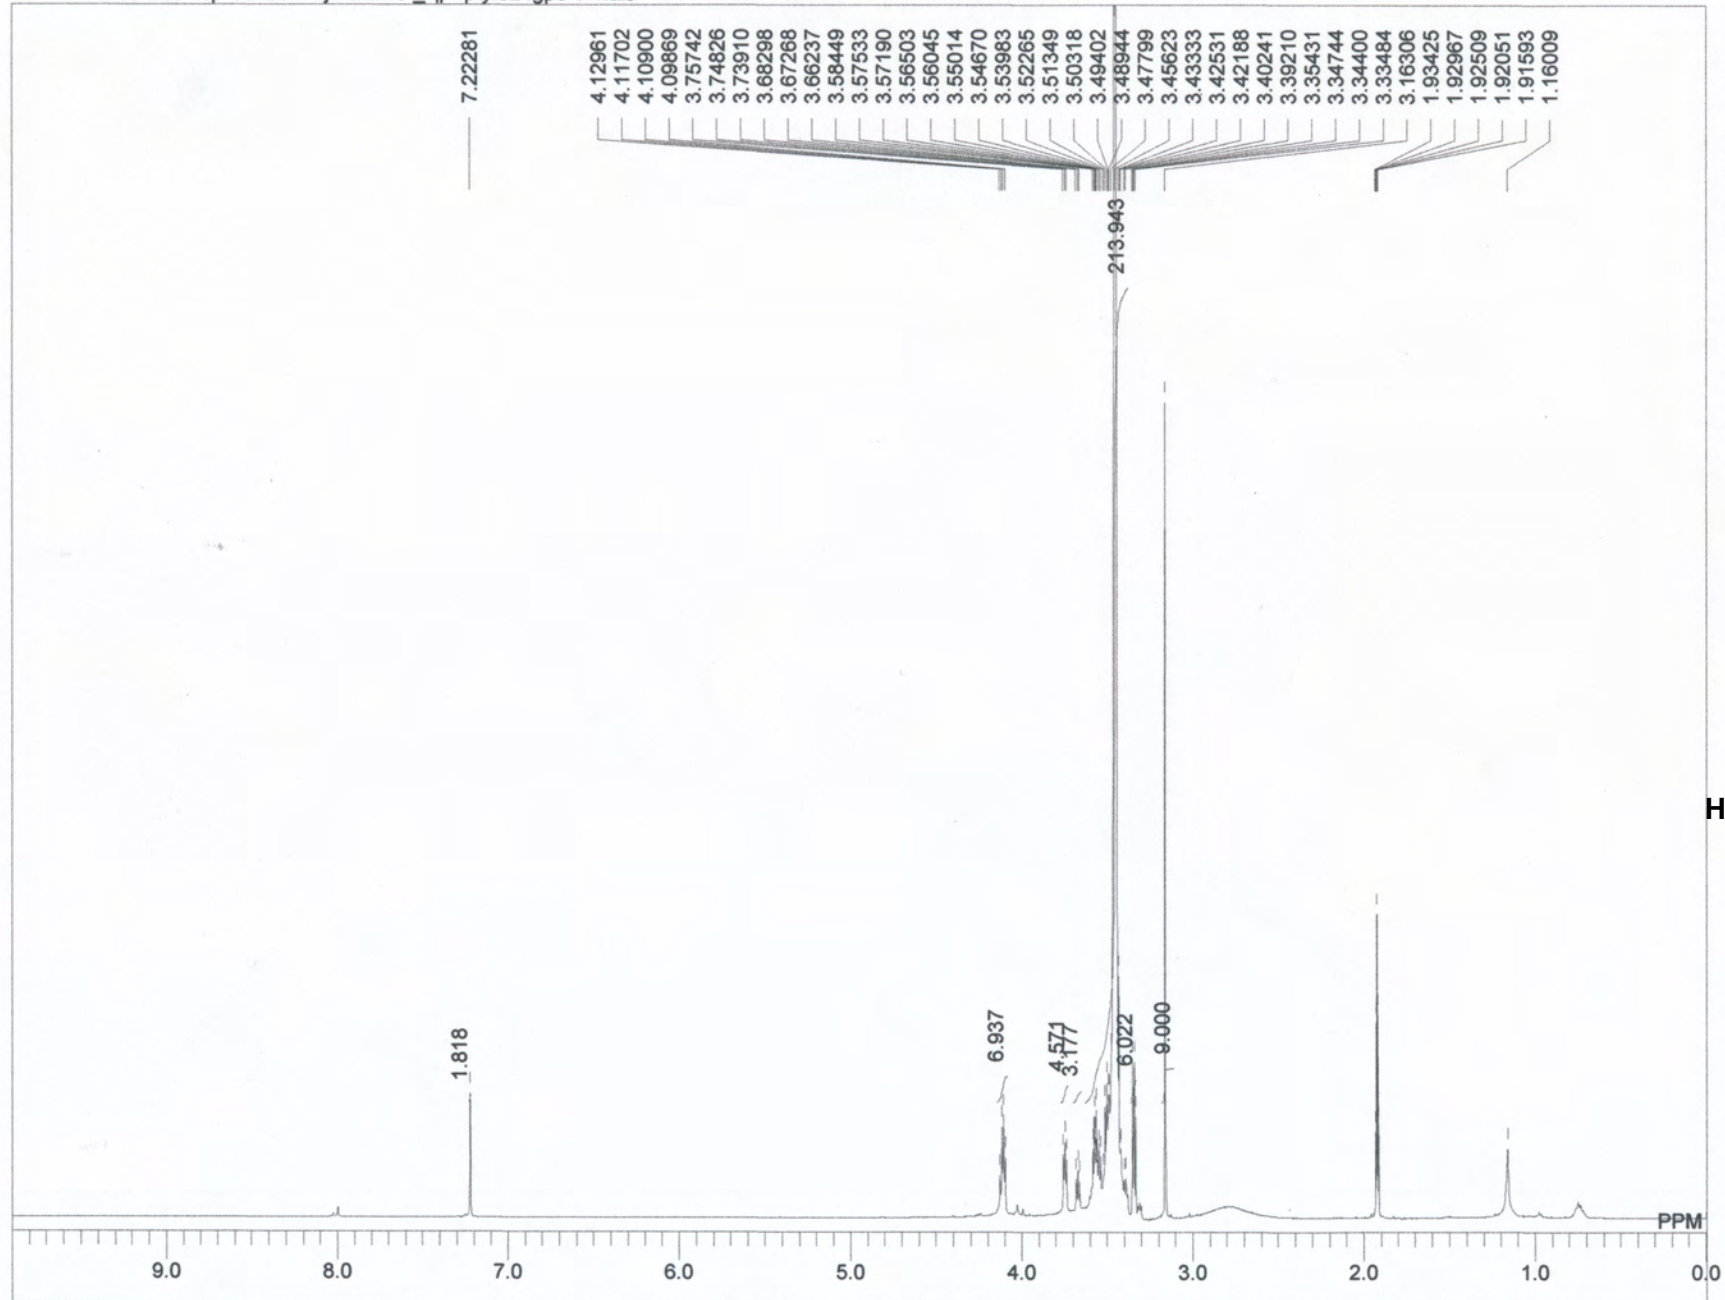

DFILE yf324gpc-1-1.als  
 COMNT  
 DATIM 2018-12-27 14:51:21  
 OBNUC 1H  
 EXMOD proton.jxp  
 OBFRQ 500.16 MHz  
 OBSET 2.41 KHz  
 OBFIN 6.01 Hz  
 POINT 13107  
 FREQU 7507.51 Hz  
 SCANS 8  
 ACQTM 1.7459 sec  
 PD 5.0000 sec  
 PW1 5.55 usec  
 IRNUC 1H  
 CTEMP 21.7 c  
 SLVNT ACETN  
 EXREF 0.00 ppm  
 BF 0.12 Hz  
 RGAIN 26

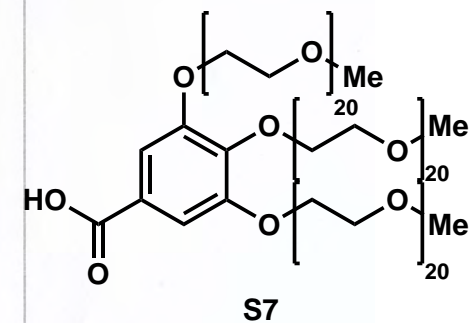

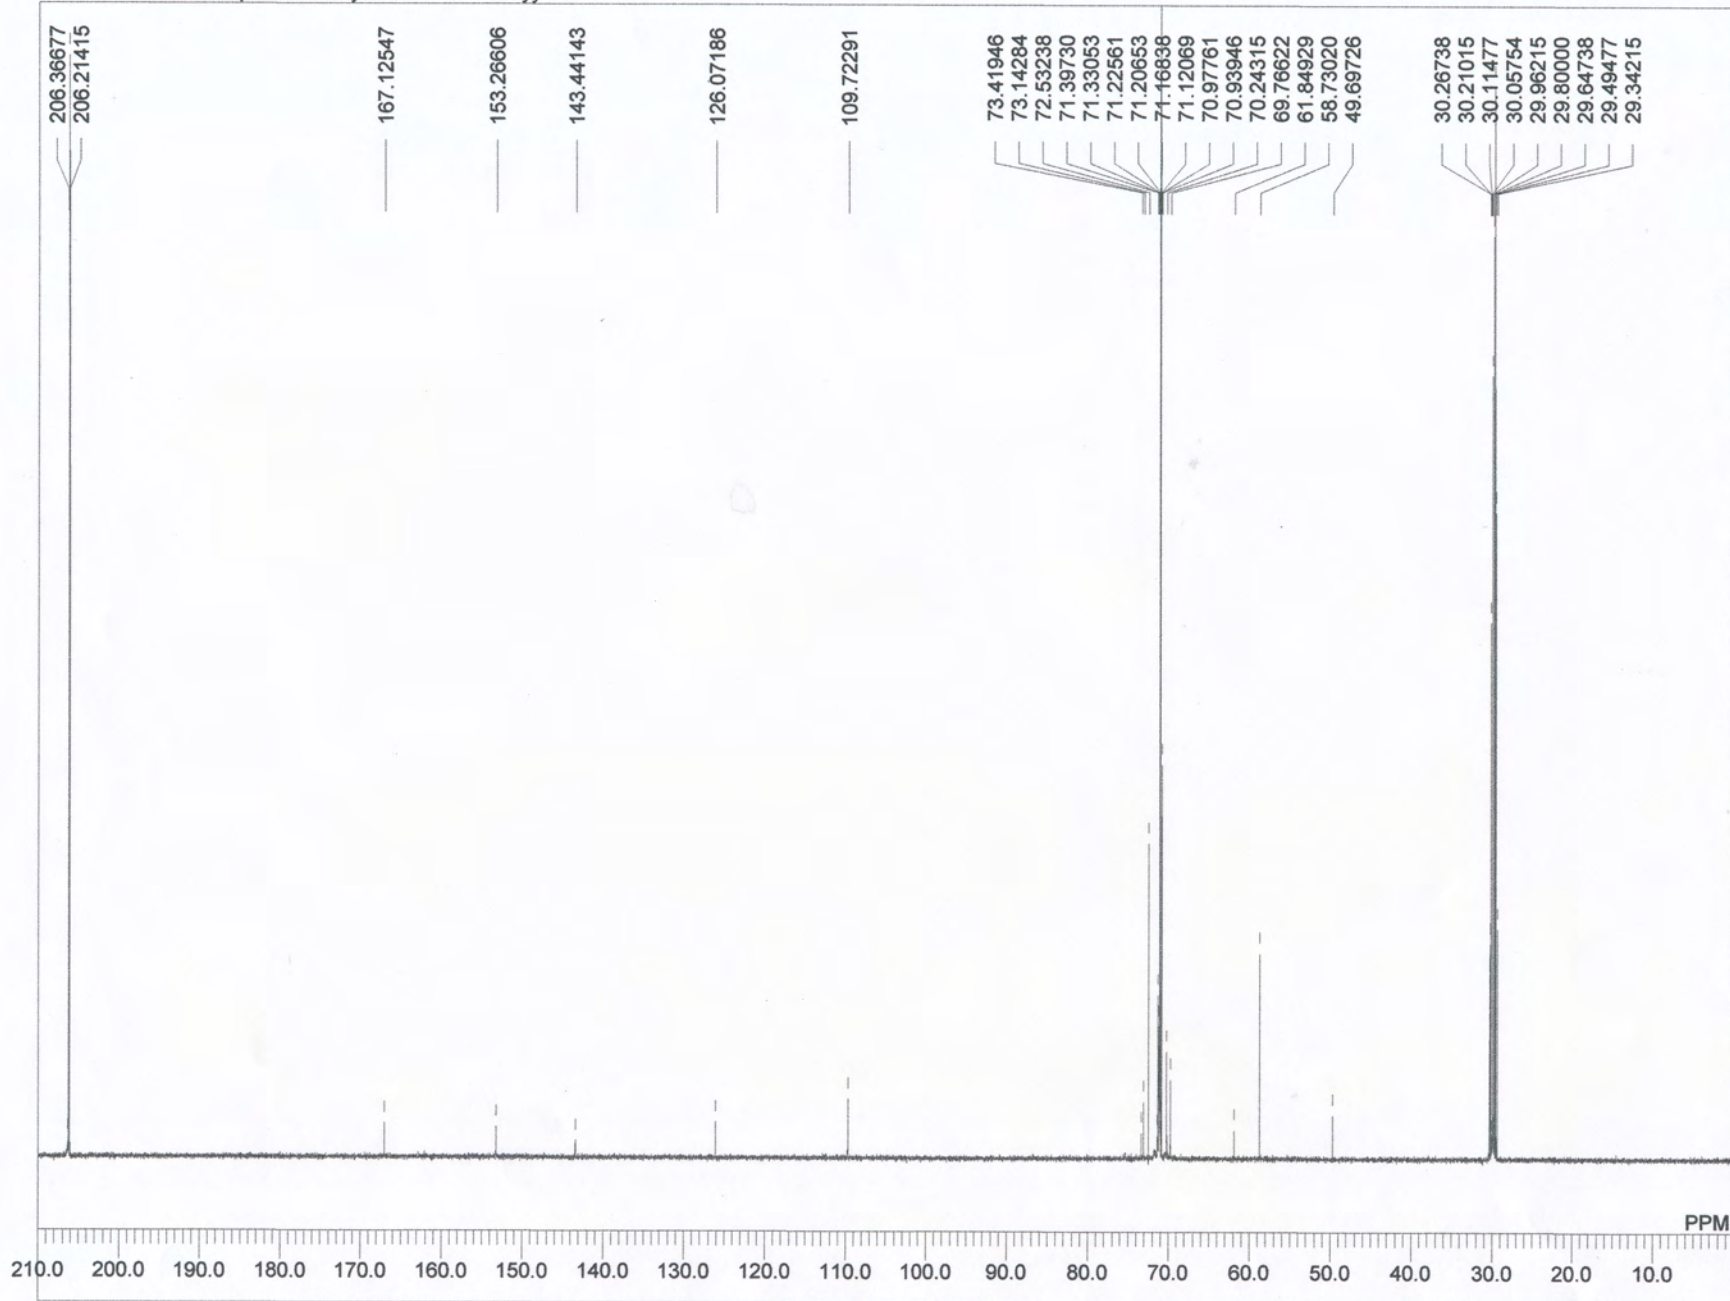

DFILE yy31C-1-1.als  
 COMNT  
 DATIM 2019-09-12 15:18:56  
 OBNUC 13C  
 EXMOD carbon.jxp  
 OBFRQ 125.77 MHz  
 OBSET 7.87 KHz  
 OBFIN 4.21 Hz  
 POINT 26214  
 FREQU 31446.54 Hz  
 SCANS 682  
 ACQTM 0.8336 sec  
 PD 2.0000 sec  
 PW1 3.40 usec  
 IRNUC 1H  
 CTEMP 22.0 c  
 SLVNT ACETN  
 EXREF 29.80 ppm  
 BF 0.12 Hz  
 RGAIN 60

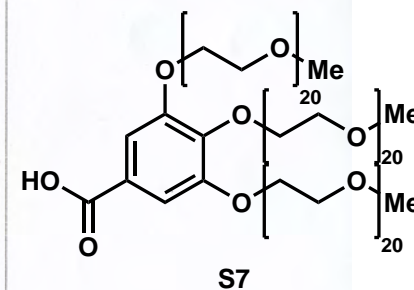





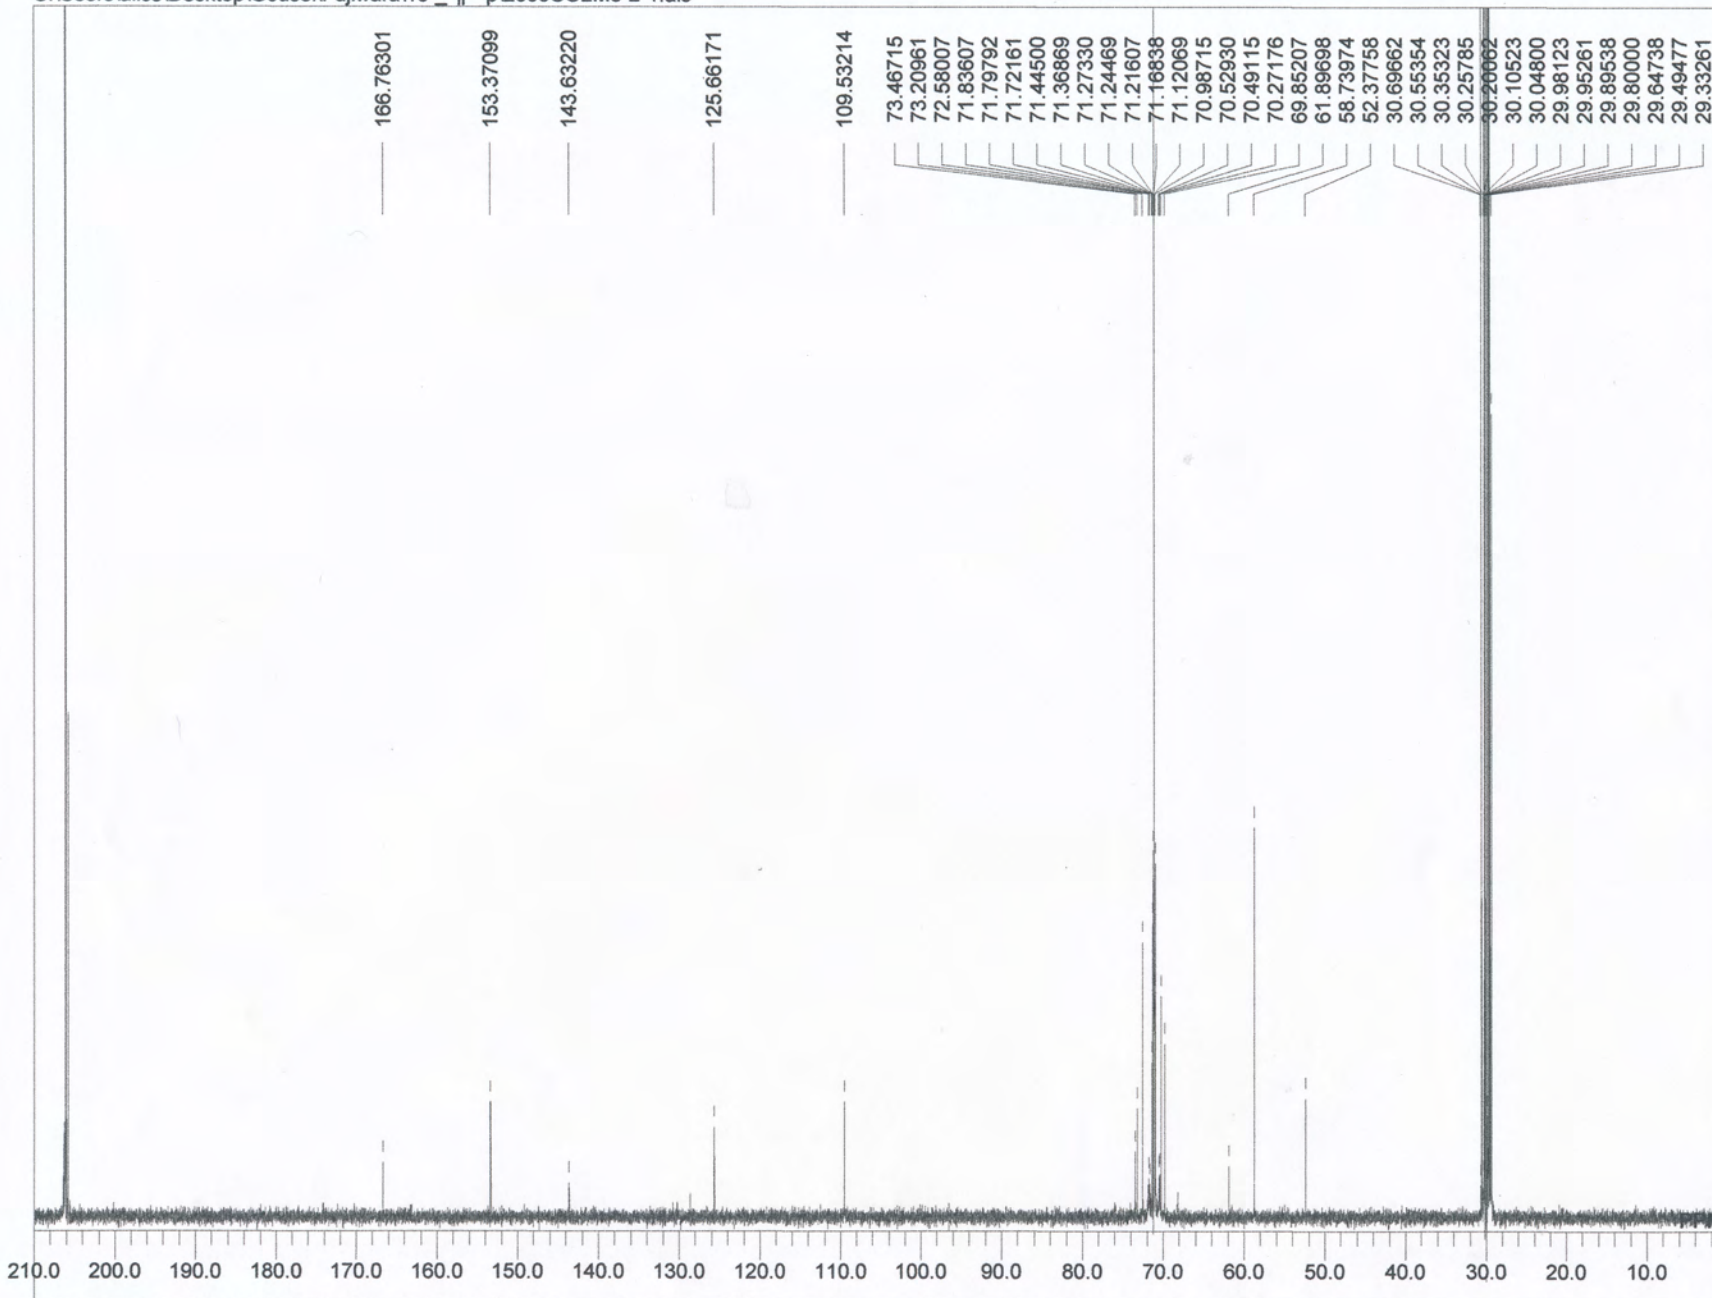

DFILE 2000CO2Me-2-1.als  
 COMNT  
 DATIM 2019-09-11 18:28:19  
 OBNUC 13C  
 EXMOD carbon.jpg  
 OBFRQ 125.77 MHz  
 OBSET 7.87 KHz  
 OBFIN 4.21 Hz  
 POINT 26214  
 FREQU 31446.54 Hz  
 SCANS 3336  
 ACQTM 0.8336 sec  
 PD 2.0000 sec  
 PW1 3.40 usec  
 IRNUC 1H  
 CTEMP 22.1 c  
 SLVNT ACETN  
 EXREF 29.80 ppm  
 BF 0.12 Hz  
 RGAIN 60

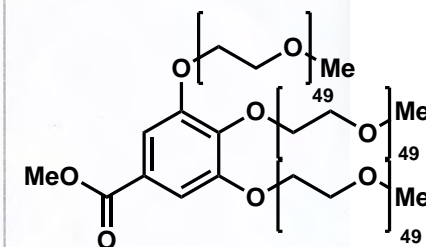

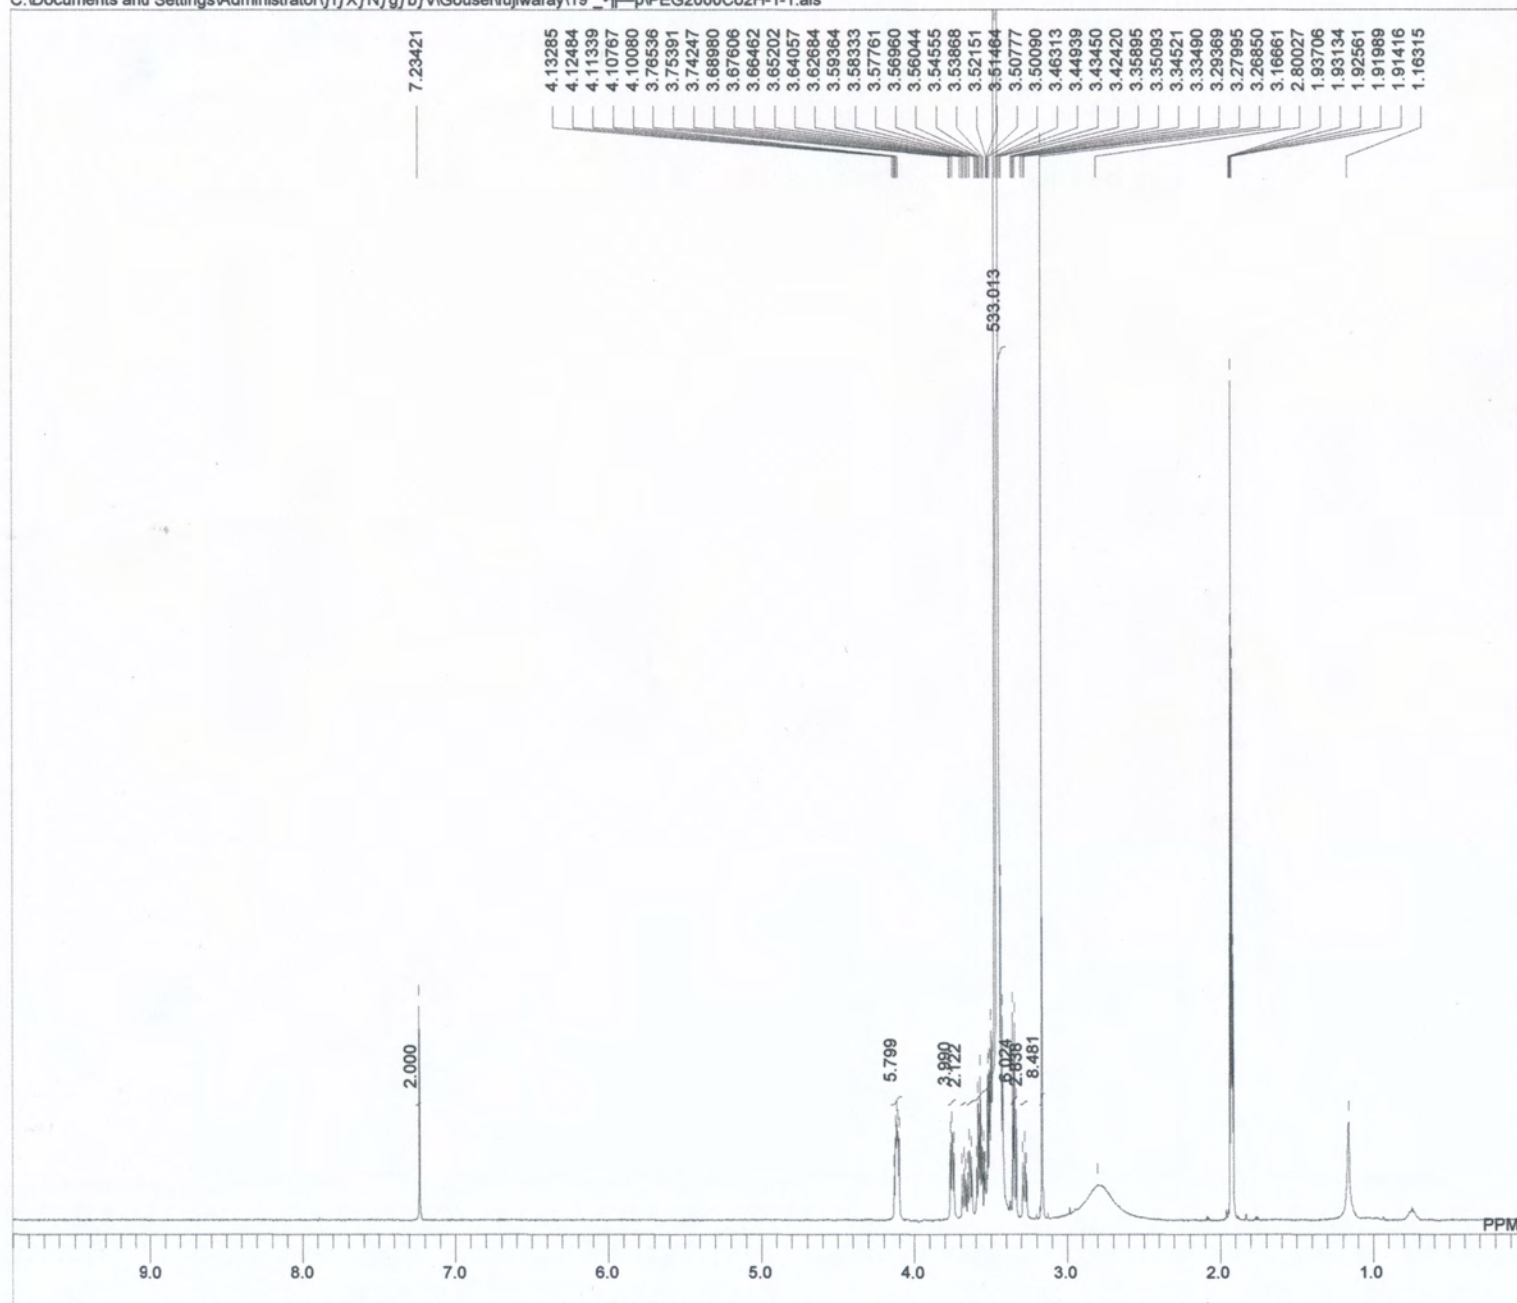

DFILE PEG2000Co2H-1-1.als  
 COMNT  
 DATIM 21-08-2019 23:04:10  
 OBNUC 1H  
 EXMOD proton.jxp  
 OBFREQ 391.78 MHz  
 OBSET 8.51 KHz  
 OBFIN 3.34 Hz  
 POINT 13107  
 FREQU 5878.90 Hz  
 SCANS 8  
 ACQTM 2.2295 sec  
 PD 6.0000 sec  
 PW1 5.17 usec  
 IRNUC 1H  
 CTEMP 20.9 c  
 SLVNT ACETN  
 EXREF 0.00 ppm  
 BF 0.12 Hz  
 RGAIN 30

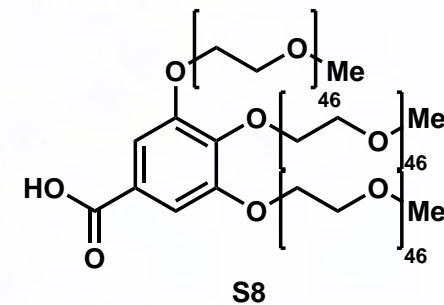

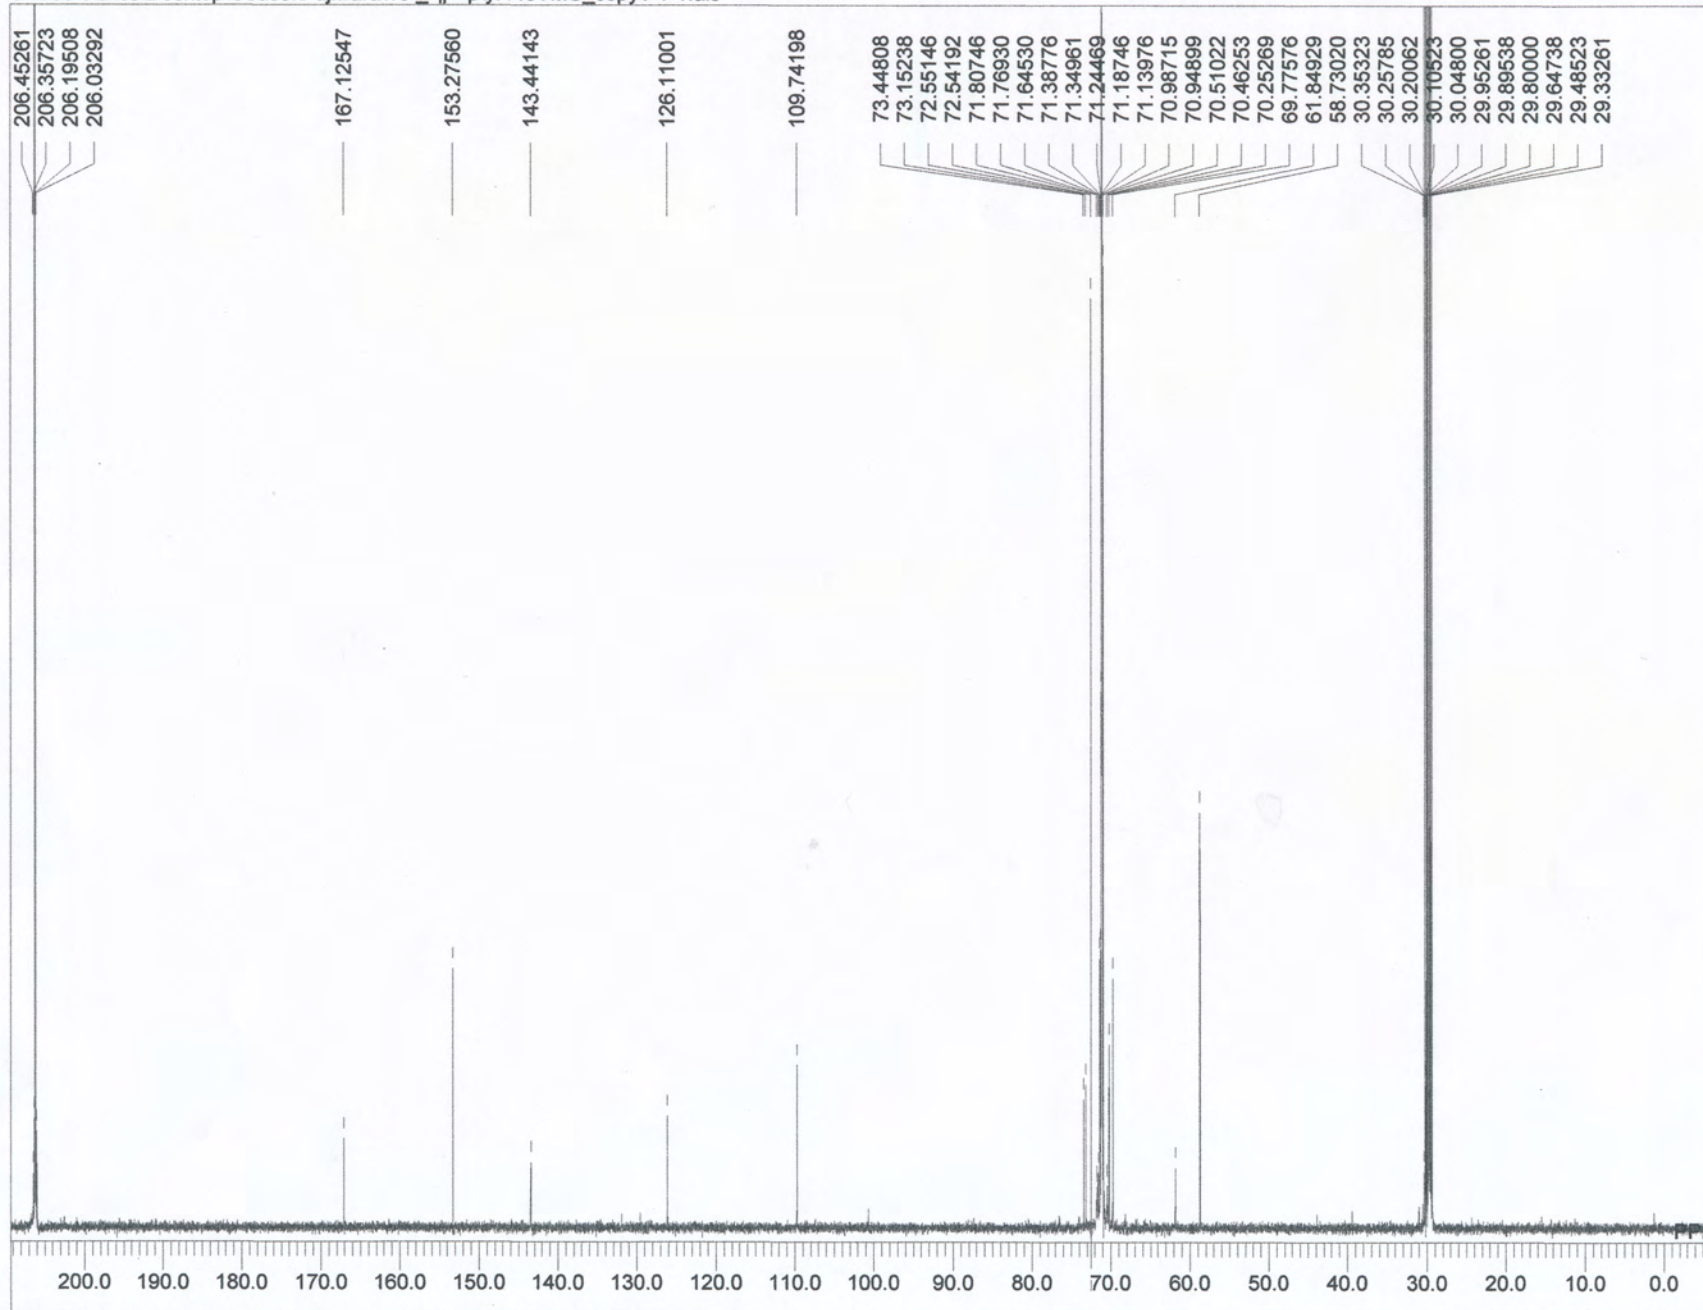

DFILE yf443TMC\_copy1-1-1  
 COMNT  
 DATIM 2019-08-29 22:18:24  
 OBNUC 13C  
 EXMOD carbon.jxp  
 OBFRQ 125.77 MHz  
 OBSET 7.87 KHz  
 OBFIN 4.21 Hz  
 POINT 26214  
 FREQU 31446.54 Hz  
 SCANS 11731  
 ACQTM 0.0000 sec  
 PD 2.0000 sec  
 PW1 3.40 usec  
 IRNUC 1H  
 CTEMP 22.0 c  
 SLVNT ACETN  
 EXREF 29.80 ppm  
 BF 0.12 Hz  
 RGAIN 60

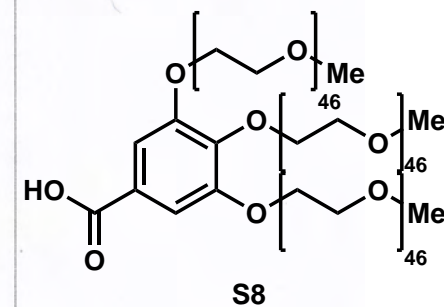



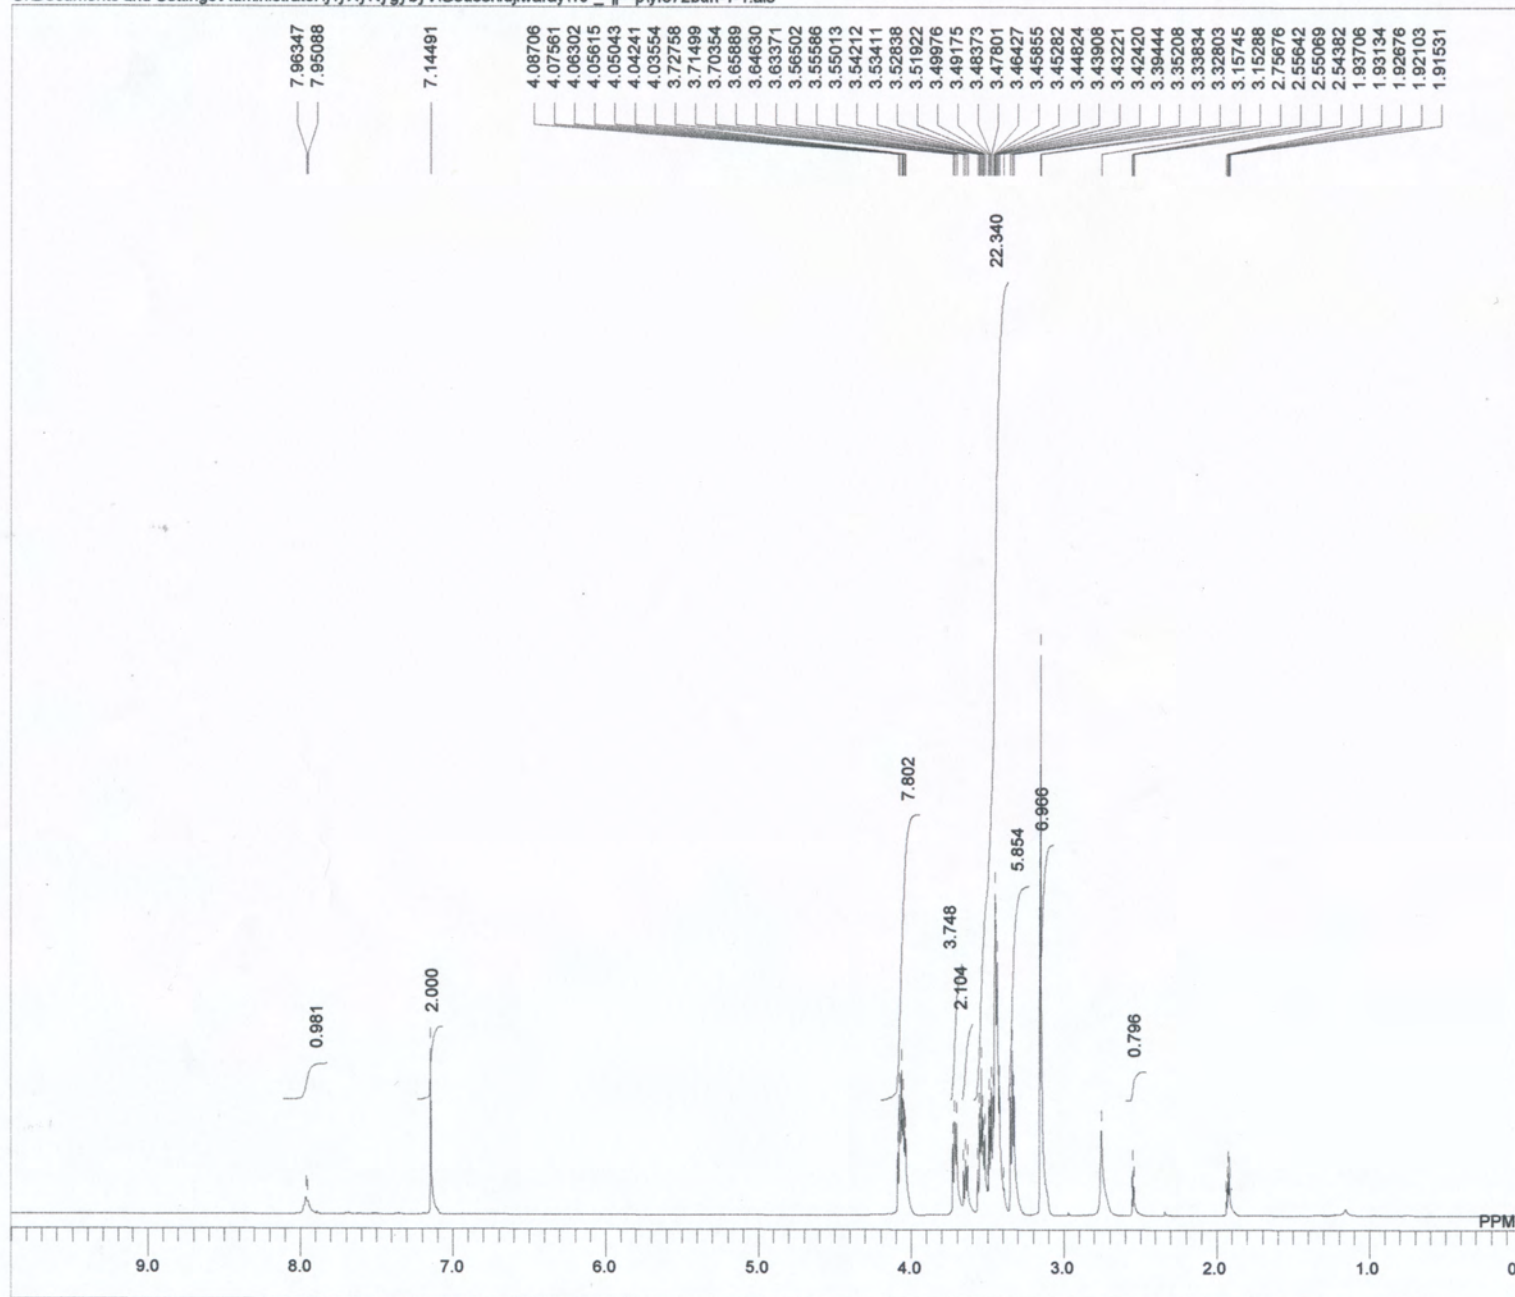

DFILE yf372bun-1-1.als  
 COMNT  
 DATIM 22-08-2019 23:25:08  
 OBNUC 1H  
 EXMOD proton.jxp  
 OBFRQ 391.78 MHz  
 OBSET 8.51 KHz  
 OBFIN 3.34 Hz  
 POINT 13107  
 FREQU 5878.90 Hz  
 SCANS 8  
 ACQTM 2.2295 sec  
 PD 6.0000 sec  
 PW1 5.17 usec  
 IRNUC 1H  
 CTEMP 20.9 c  
 SLVNT ACETN  
 EXREF 0.00 ppm  
 BF 0.12 Hz  
 RGAIN 28

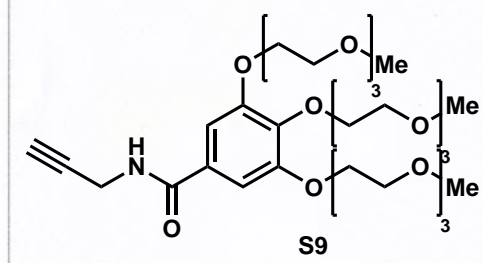





C:\Users\alice\Desktop\Gousei\Fujiwara\19\*\_f1-lyf290tm.als

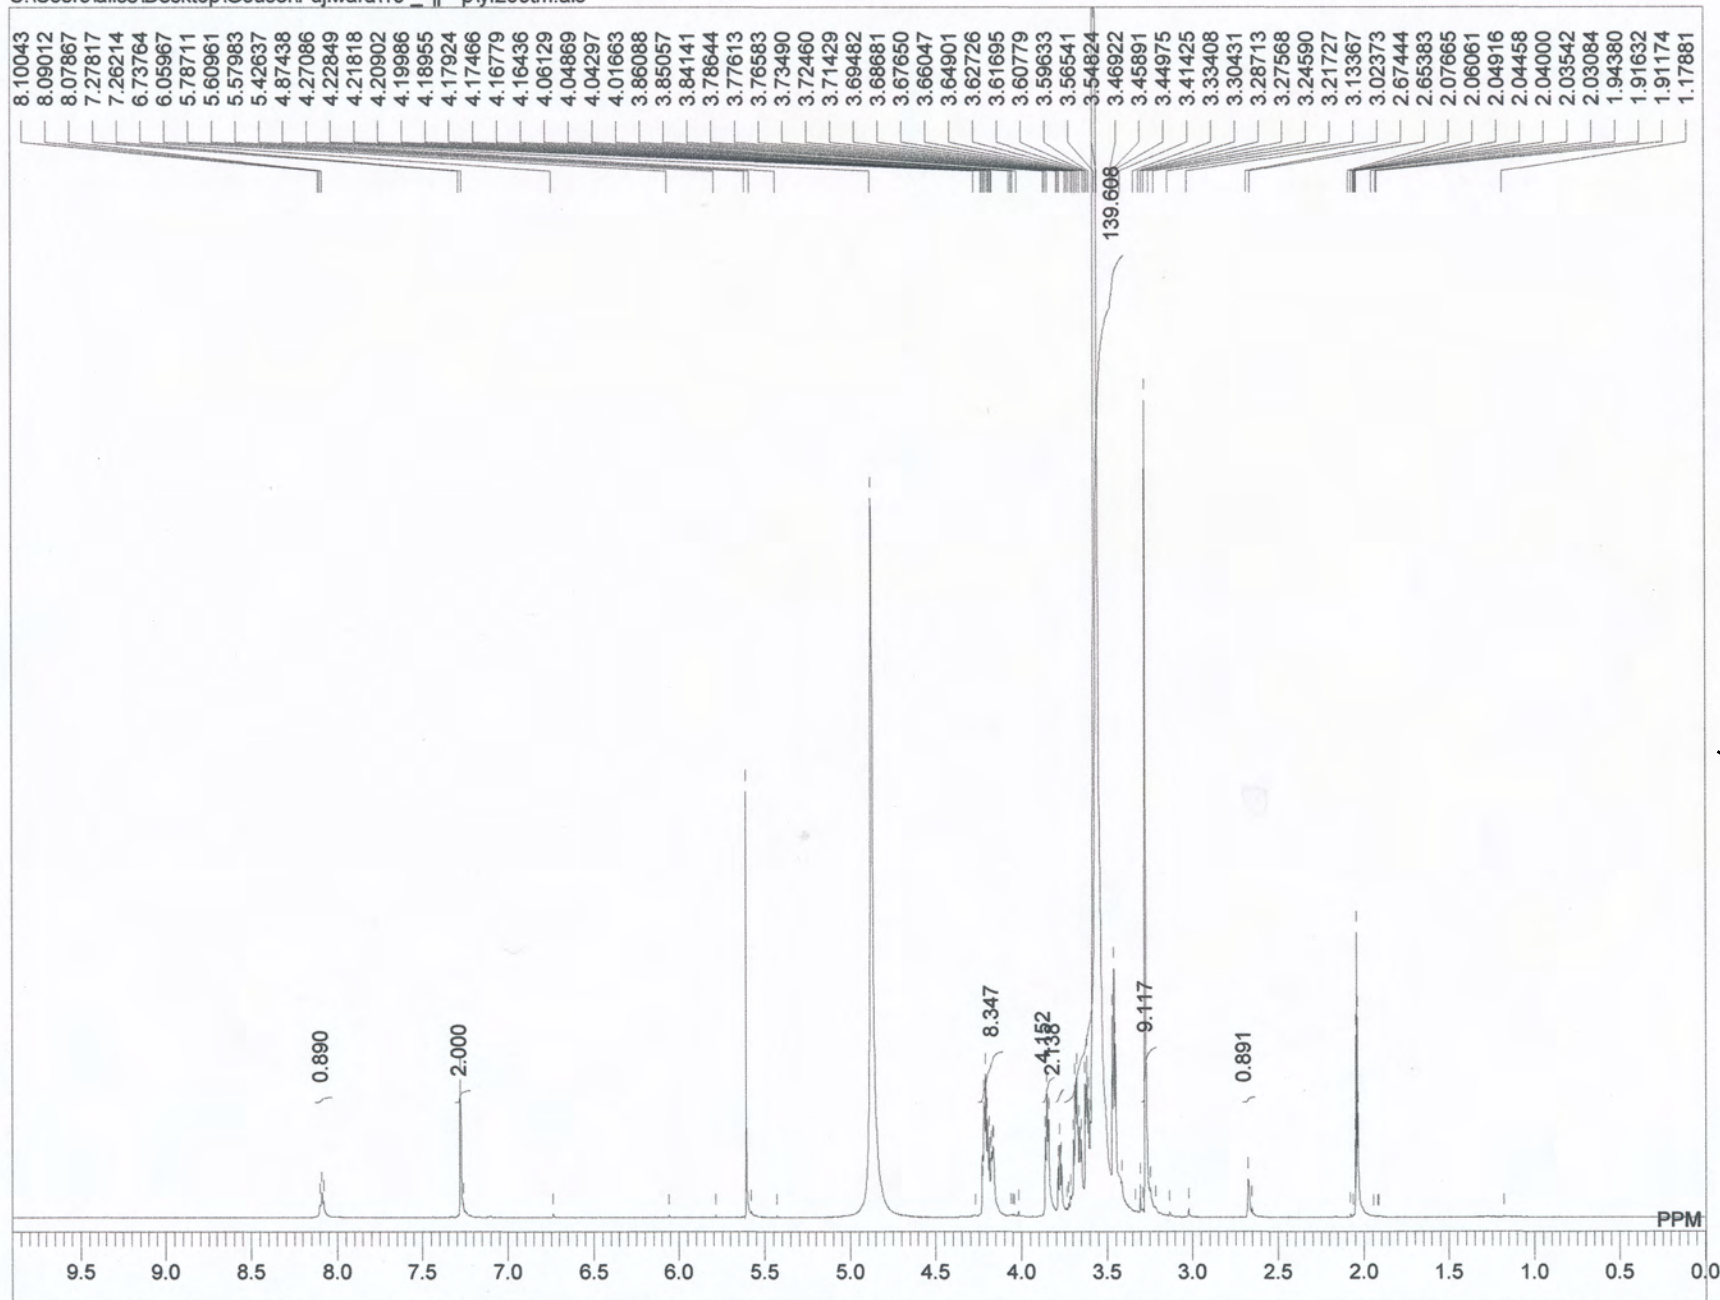

DFILE yf290tm.als  
 COMNT  
 DATIM 2018-08-02 17:58:51  
 OBNUC 1H  
 EXMOD proton.jxp  
 OBFRQ 500.16 MHz  
 OBSET 2.41 KHz  
 OBFIN 6.01 Hz  
 POINT 13107  
 FREQU 7507.51 Hz  
 SCANS 8  
 ACQTM 1.7459 sec  
 PD 5.0000 sec  
 PW1 5.55 usec  
 IRNUC 1H  
 CTEMP 21.3 c  
 SLVNT ACETN  
 EXREF 2.04 ppm  
 BF 0.12 Hz  
 RGAIN 26

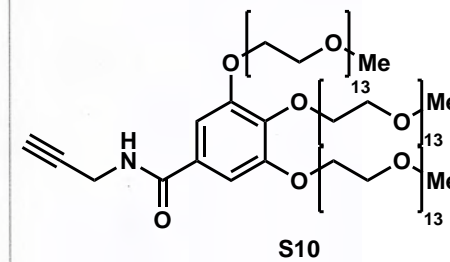

C:\Users\alice\Desktop\Gousei\Fujiwara\19\_...p\290-550prop-2-1.als

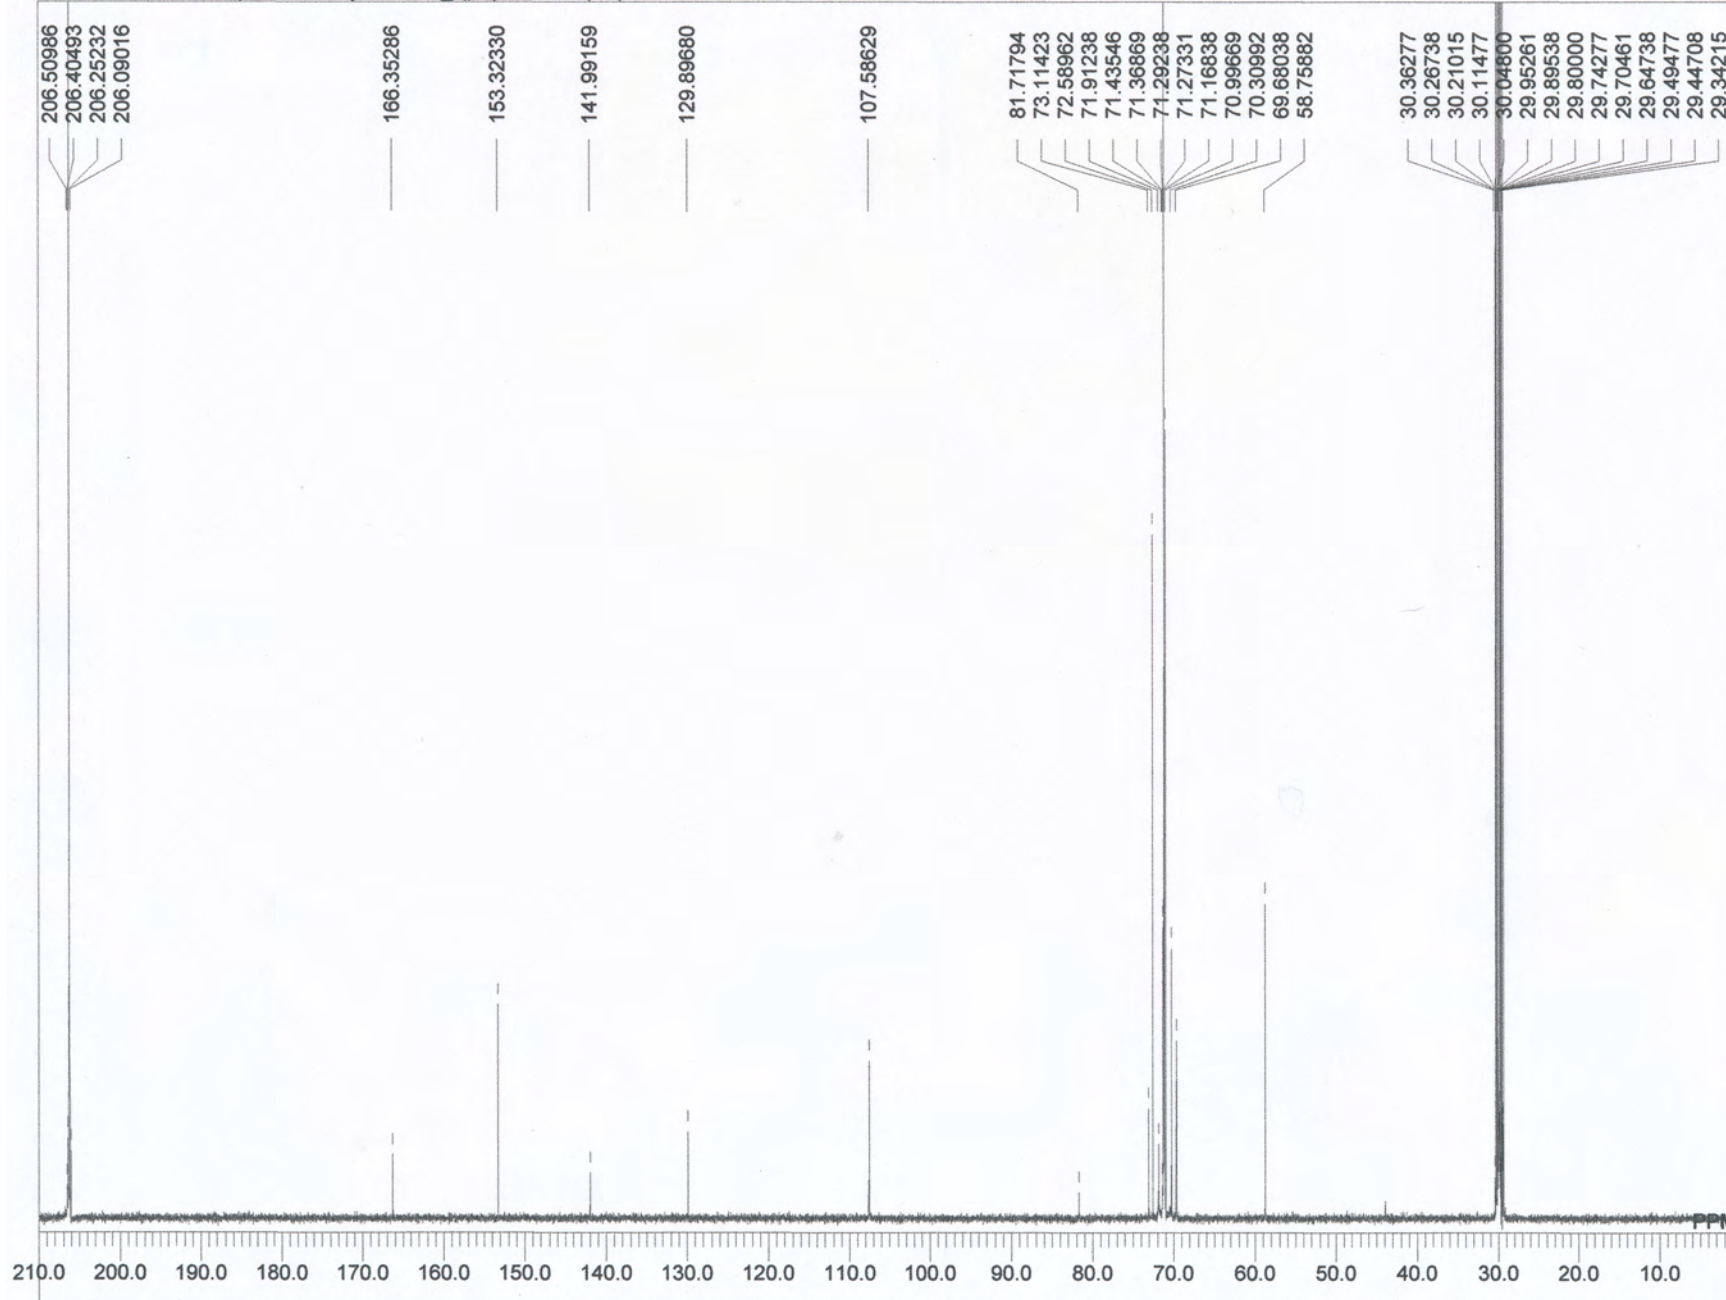

DFILE 290-550prop-2-1.als  
COMNT  
DATIM 2019-09-13 15:24:19  
OBNUC 13C  
EXMOD carbon.jxp  
OBFRQ 125.77 MHz  
OBSET 7.87 KHz  
OBFIN 4.21 Hz  
POINT 26214  
FREQU 31446.54 Hz  
SCANS 7334  
ACQTM 0.8336 sec  
PD 2.0000 sec  
PW1 3.40 usec  
IRNUC 1H  
CTEMP 22.1 c  
SLVNT ACETN  
EXREF 29.80 ppm  
BF 0.12 Hz  
RGAIN 60

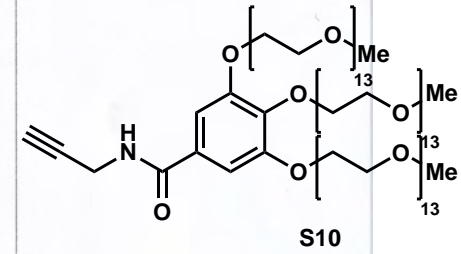

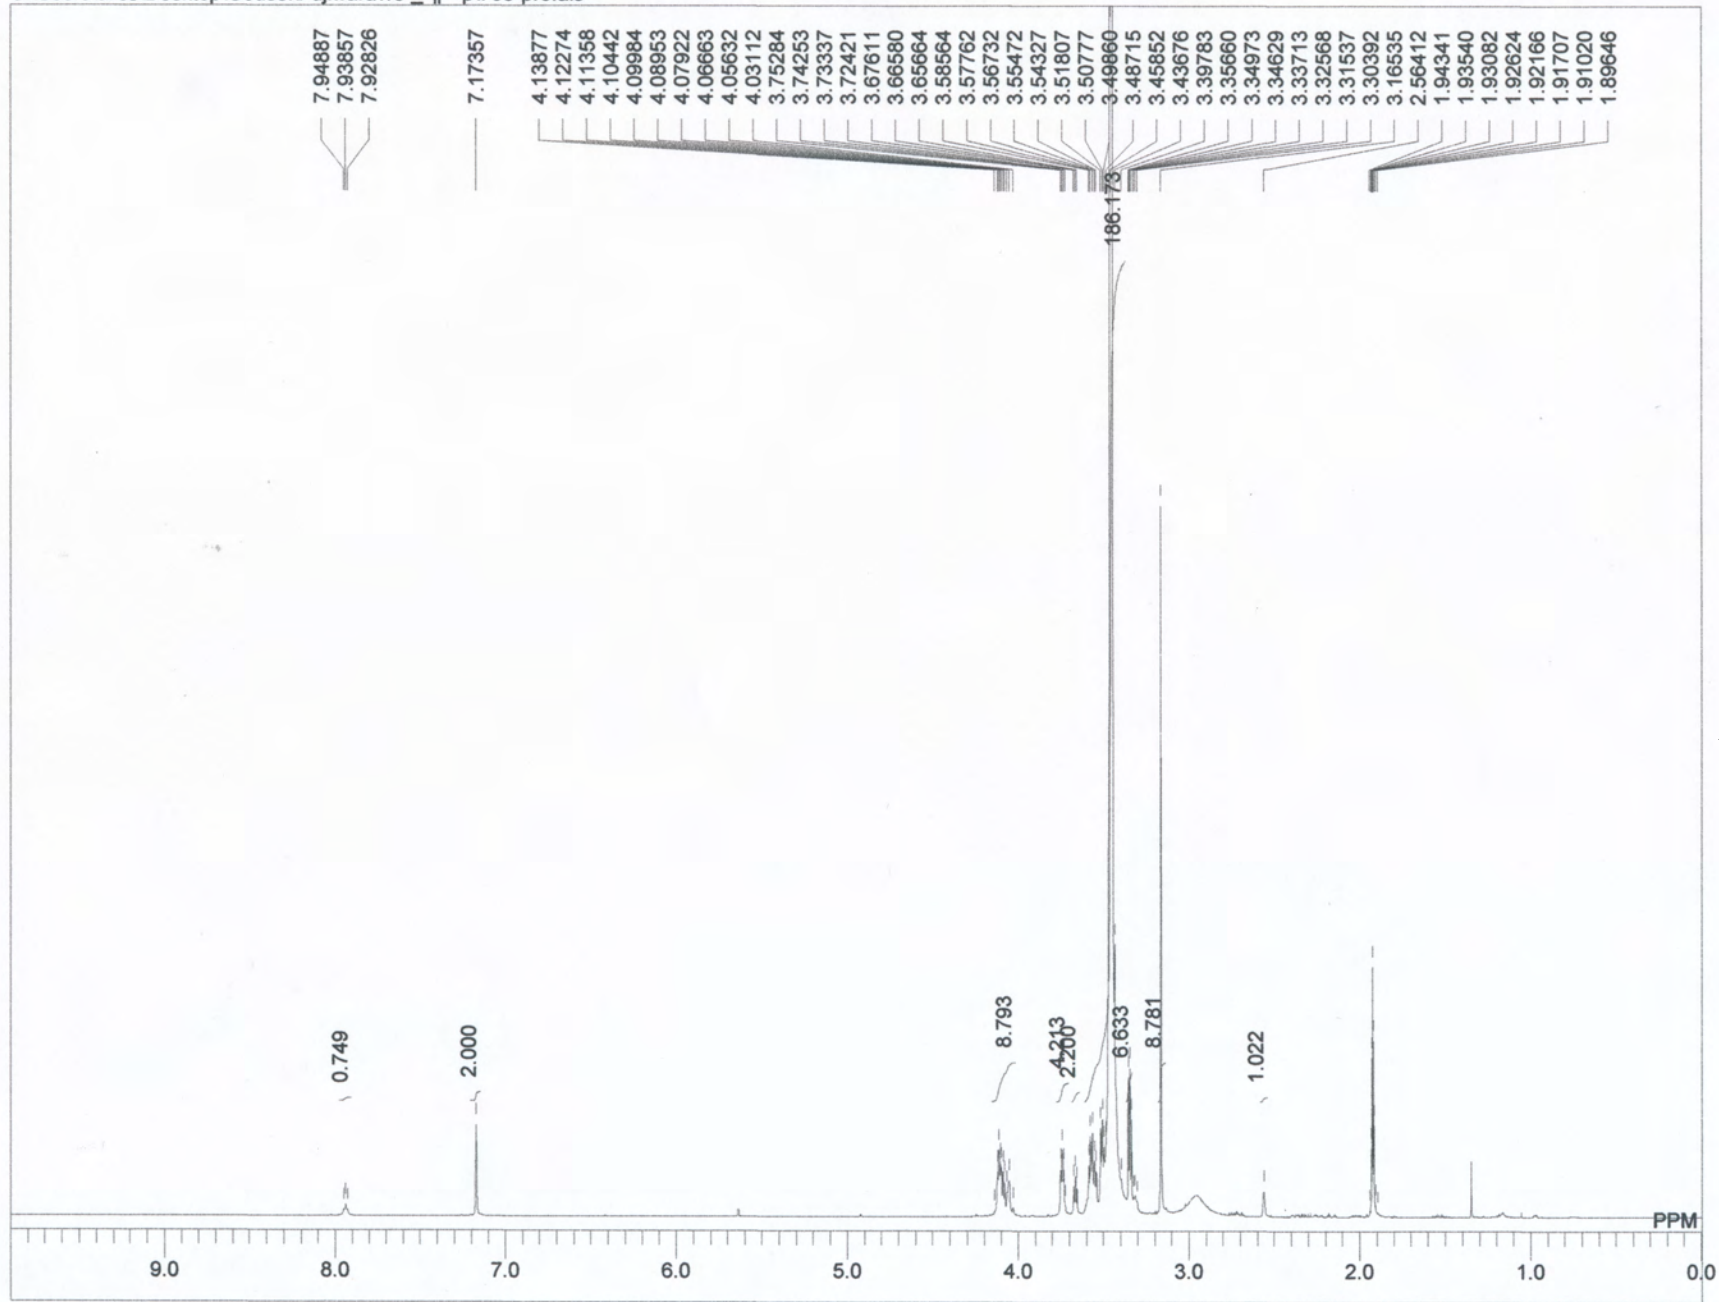

DFILE 750-pro.als  
 COMNT  
 DATIM 2019-08-27 20:38:32  
 OBNUC 1H  
 EXMOD proton.jxp  
 OBFRQ 500.16 MHz  
 OBSET 2.41 KHz  
 OBFIN 6.01 Hz  
 POINT 13107  
 FREQU 7507.51 Hz  
 SCANS 8  
 ACQTM 1.7459 sec  
 PD 6.0000 sec  
 PW1 5.55 usec  
 IRNUC 1H  
 CTEMP 21.5 c  
 SLVNT ACETN  
 EXREF 0.00 ppm  
 BF 0.12 Hz  
 RGAIN 32

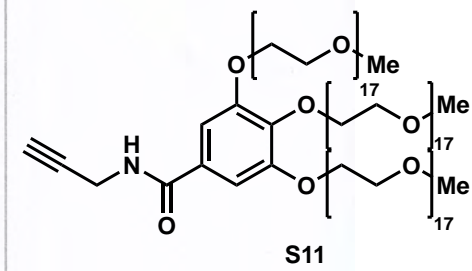



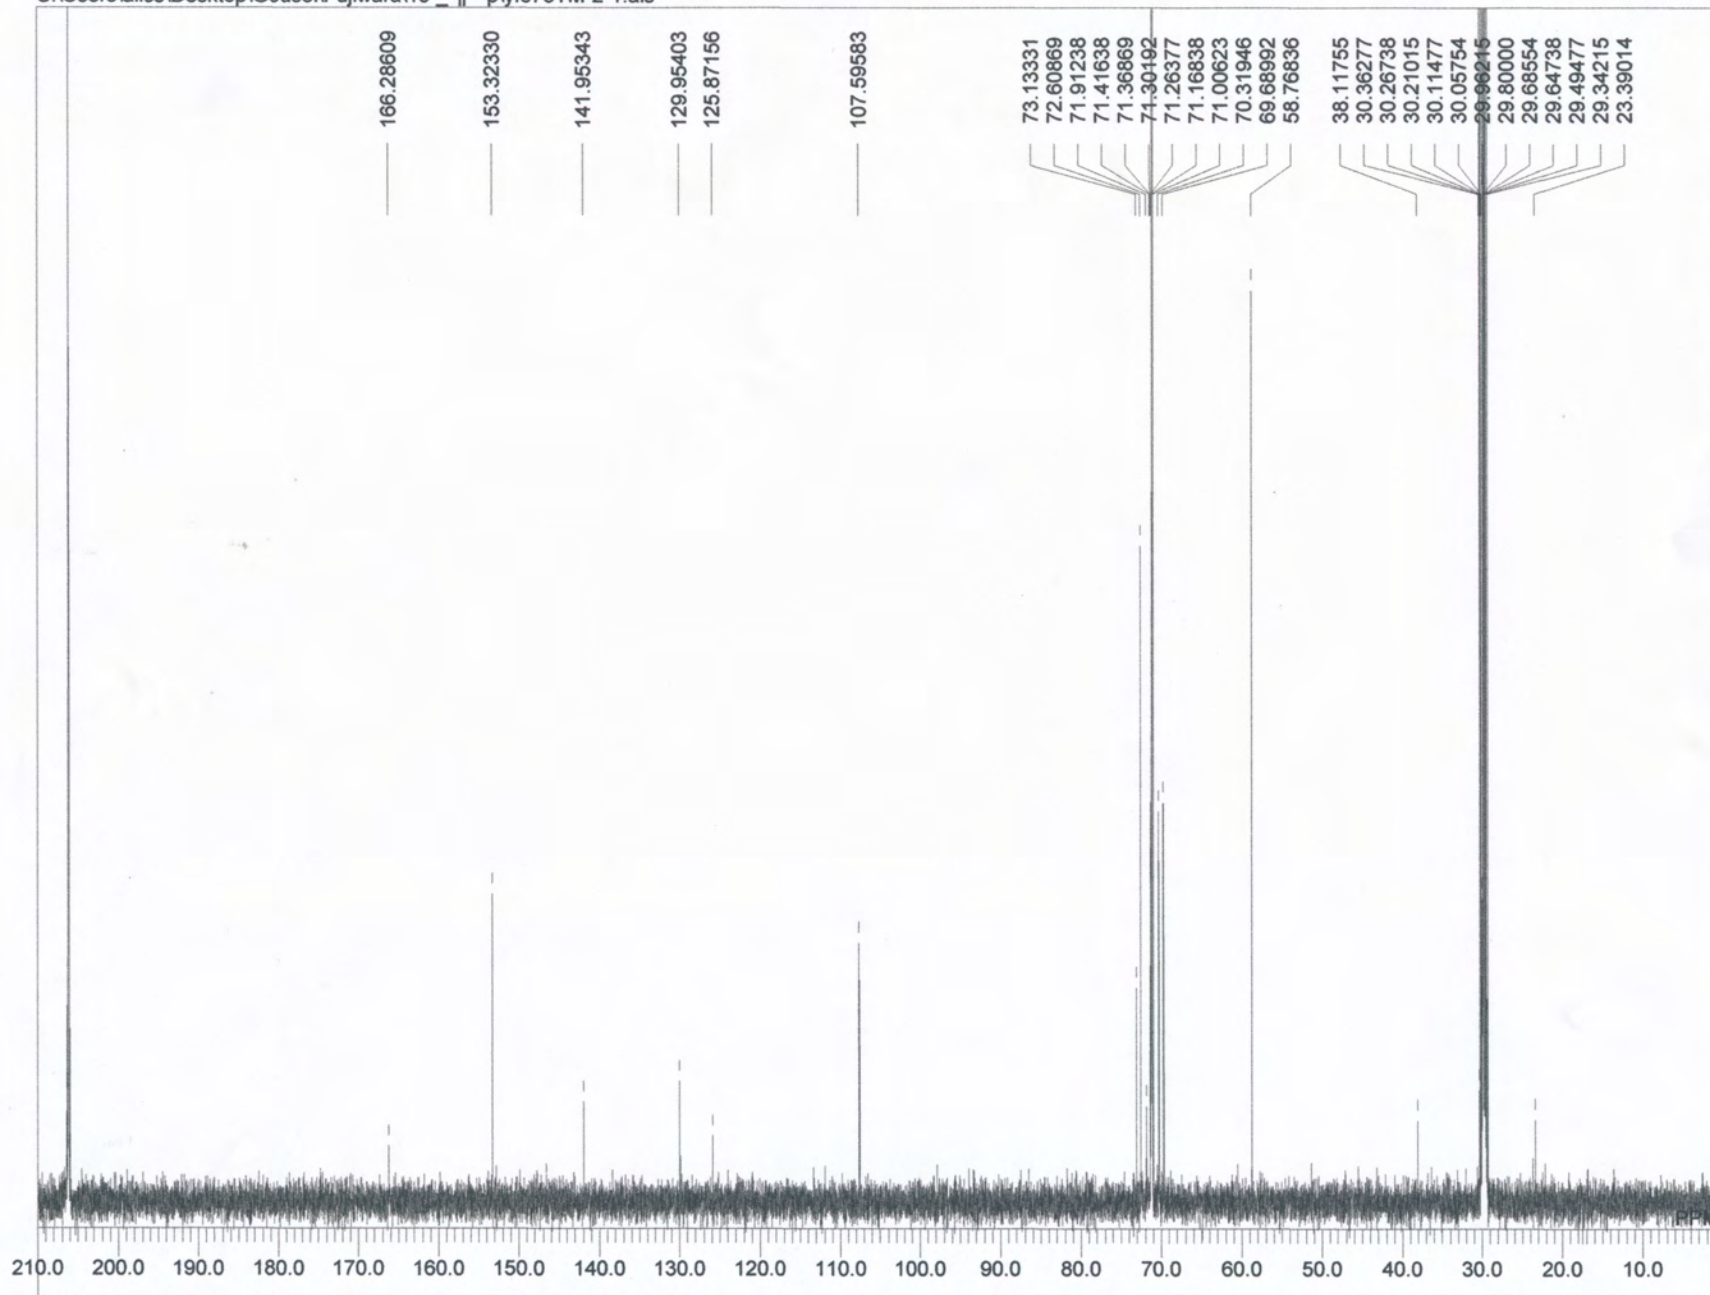

DFILE yf373TM-2-1.als  
 COMNT  
 DATIM 2019-08-27 20:40:19  
 OBNUC 13C  
 EXMOD carbon.jxp  
 OBFRQ 125.77 MHz  
 OBSET 7.87 KHz  
 OBFIN 4.21 Hz  
 POINT 26214  
 FREQU 31446.54 Hz  
 SCANS 1604  
 ACQTM 0.8336 sec  
 PD 2.0000 sec  
 PW1 3.40 usec  
 IRNUC 1H  
 CTEMP 22.0 c  
 SLVNT ACETN  
 EXREF 29.80 ppm  
 BF 0.12 Hz  
 RGAIN 60

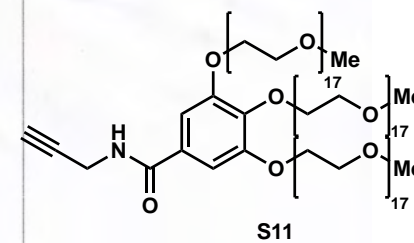

C:\Users\alice\Desktop\Gousei\Fujiwaralyf001-100\yf53hplc13-1-1.als

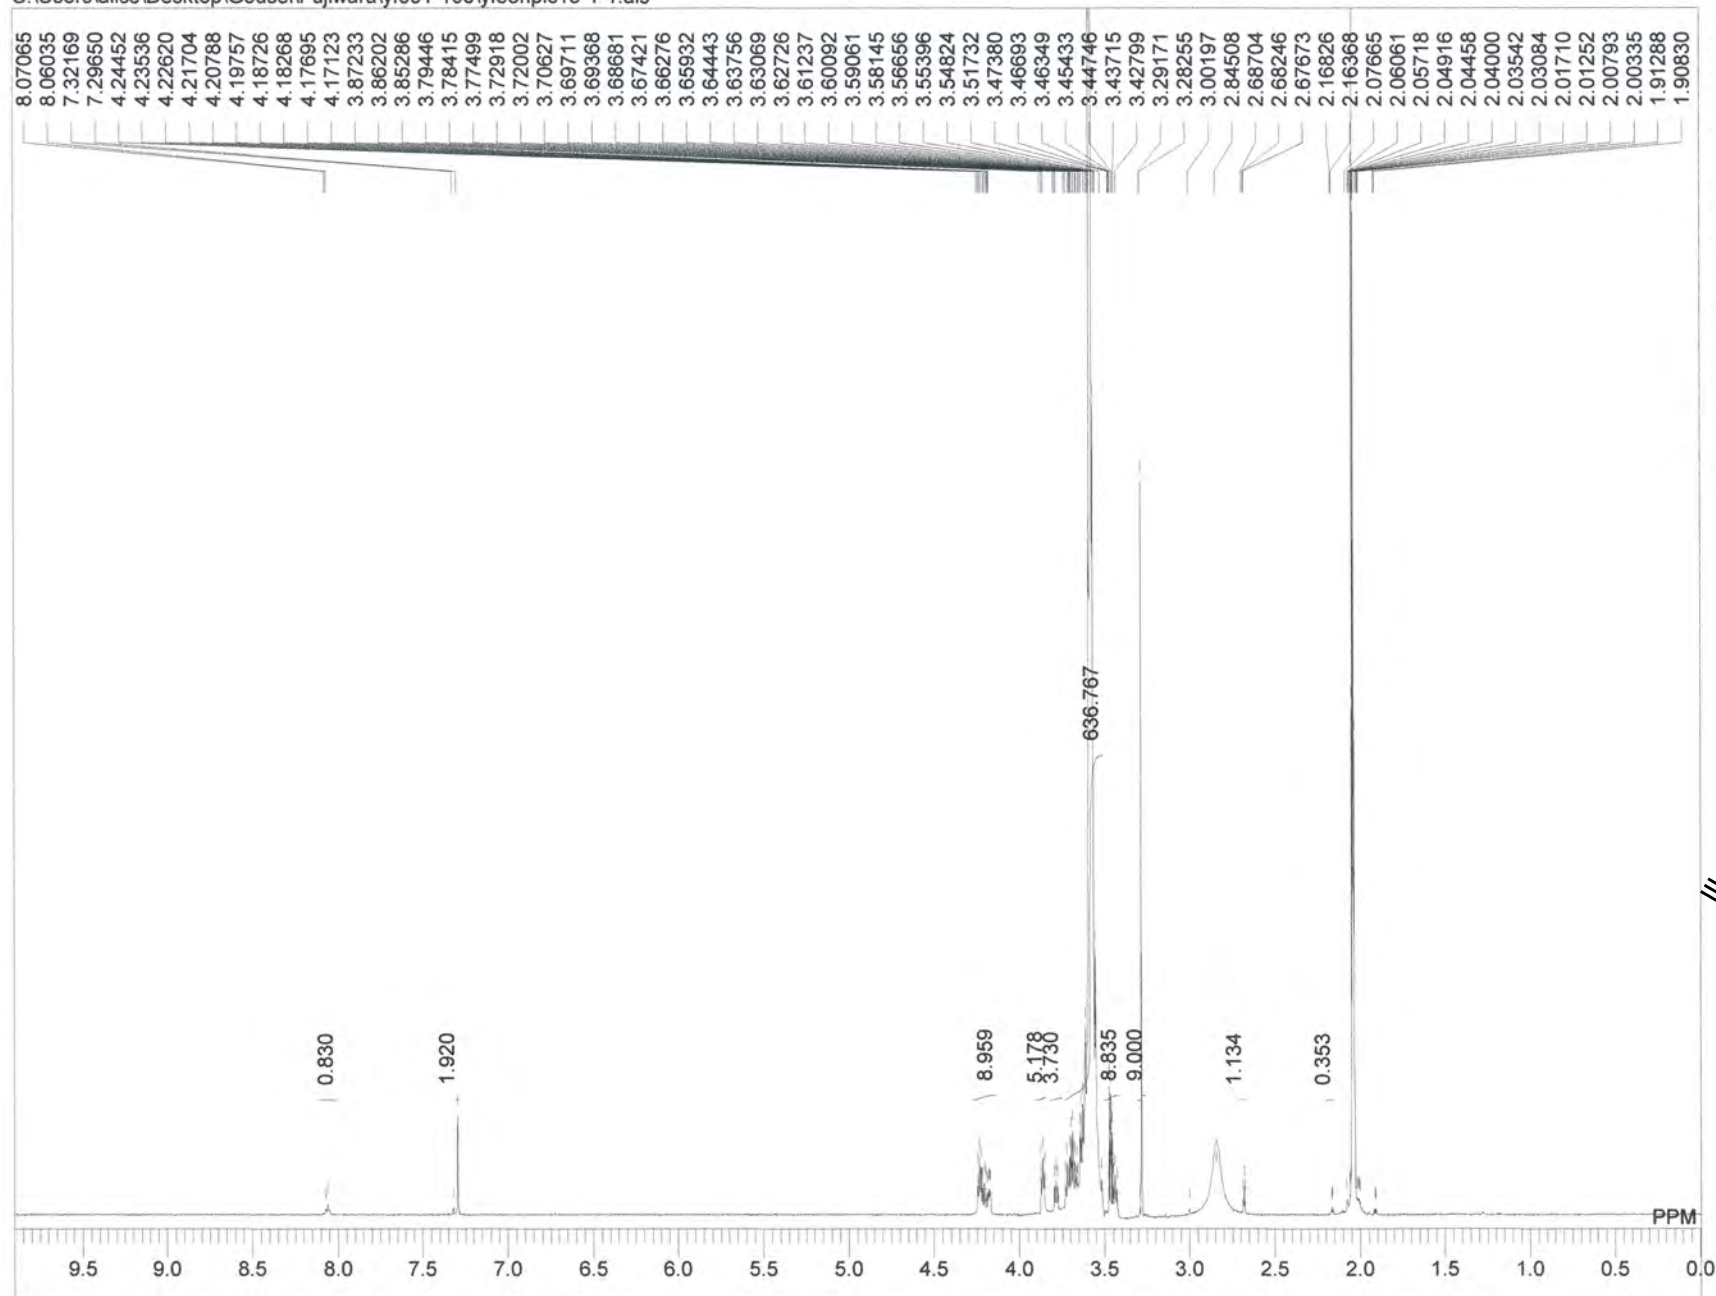

DFILE yf53hplc13-1-1.als  
COMNT  
DATIM 2016-10-10 14:01:38  
OBNUC 1H  
EXMOD proton.jxp  
OBFRQ 500.16 MHz  
OBSET 2.41 KHz  
OBFIN 6.01 Hz  
POINT 13107  
FREQU 7507.51 Hz  
SCANS 8  
ACQTM 1.7459 sec  
PD 5.0000 sec  
PW1 5.55 usec  
IRNUC 1H  
CTEMP 21.6 c  
SLVNT ACETN  
EXREF 2.04 ppm  
BF 0.12 Hz  
RGAIN 30

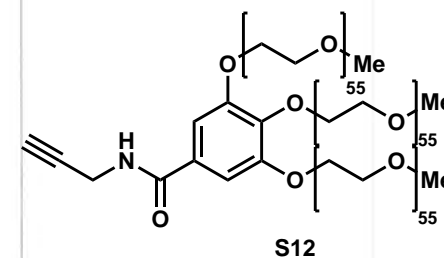

C:\Users\alice\Desktop\Gousei\Fujiwara\YF401-500\89-2000prop-2-1.als

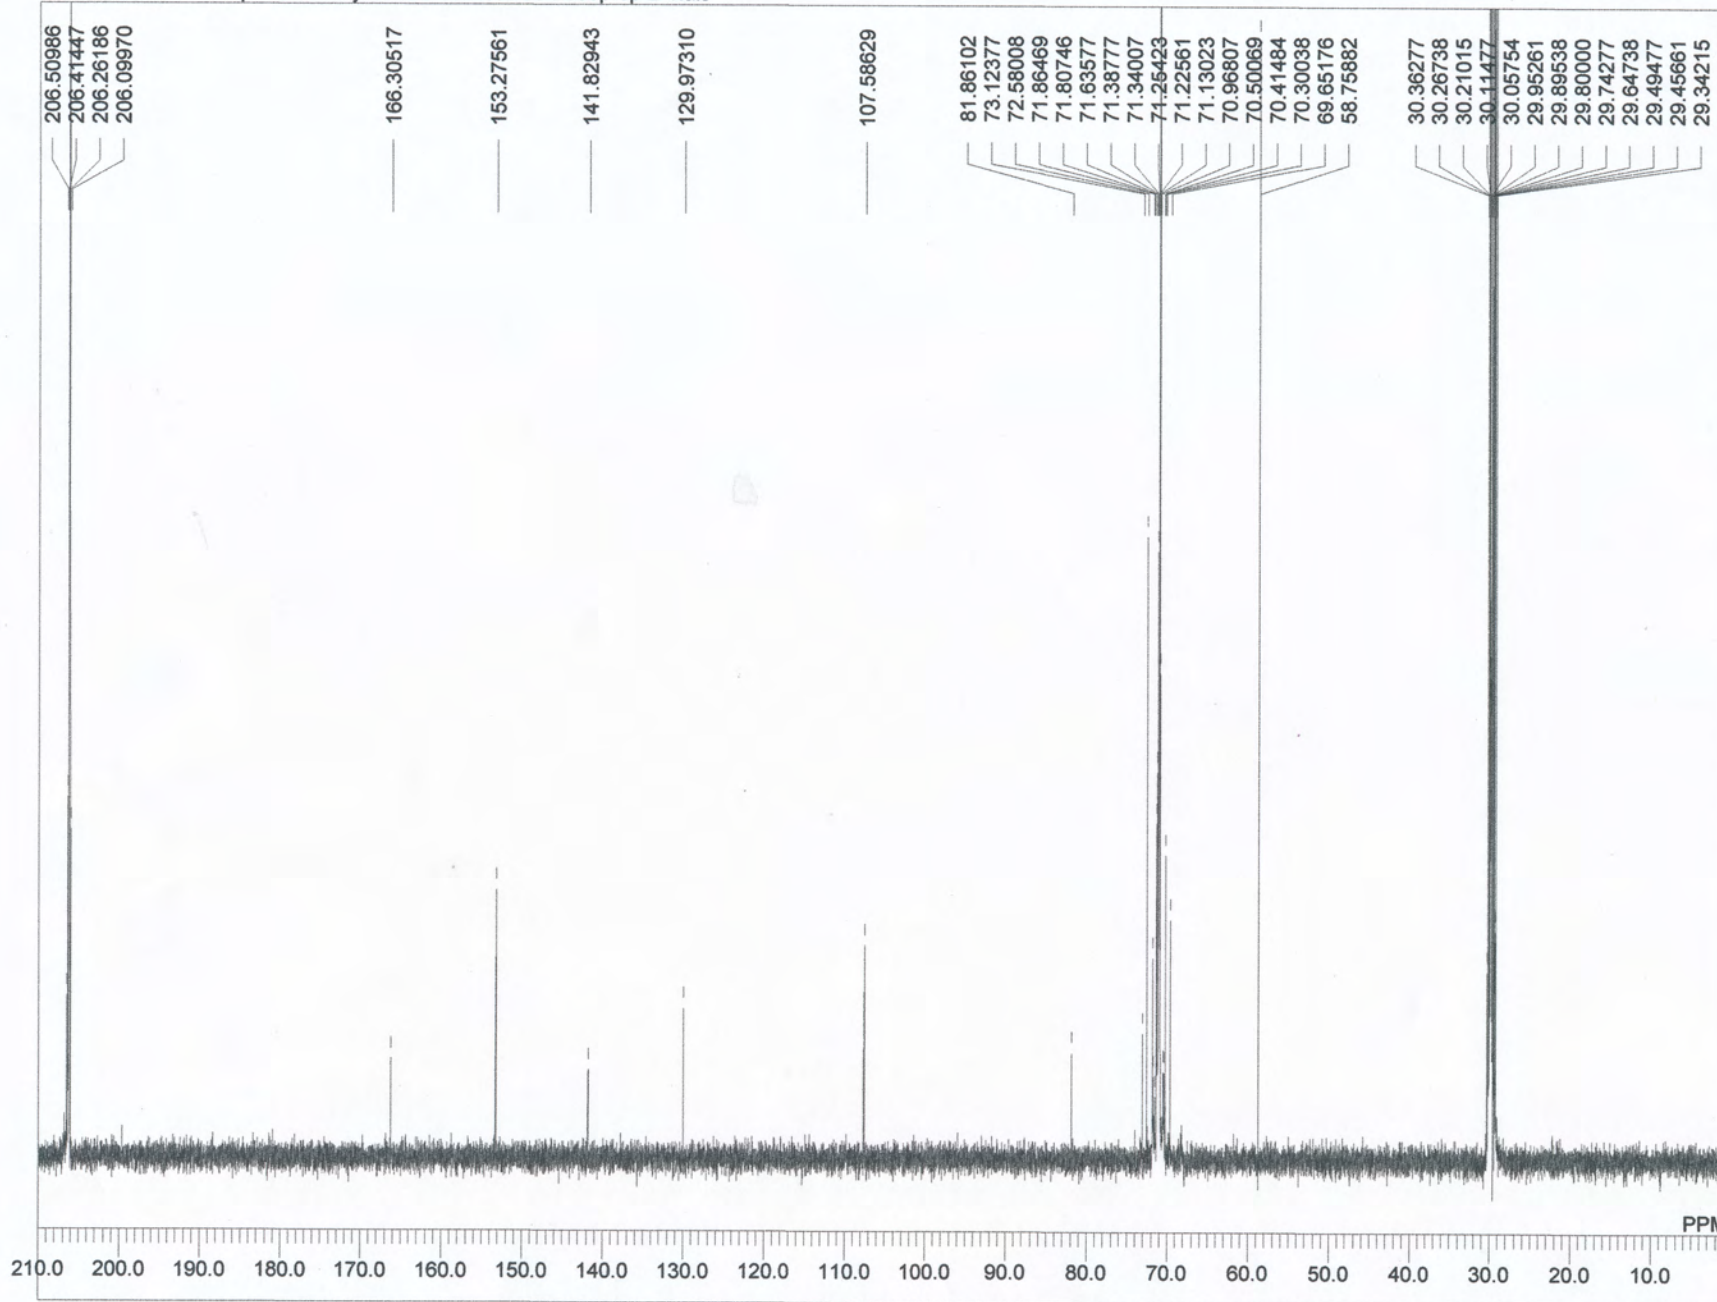

DFILE 89-2000prop-2-1.als  
COMNT  
DATIM 2019-09-13 21:20:48  
OBNUC 13C  
EXMOD carbon.jxp  
OBFRQ 125.77 MHz  
OBSET 7.87 KHz  
OBFIN 4.21 Hz  
POINT 26214  
FREQU 31446.54 Hz  
SCANS 12000  
ACQTM 0.8336 sec  
PD 2.0000 sec  
PW1 3.40 usec  
IRNUC 1H  
CTEMP 22.1 c  
SLVNT ACETN  
EXREF 29.80 ppm  
BF 0.12 Hz  
RGAIN 60

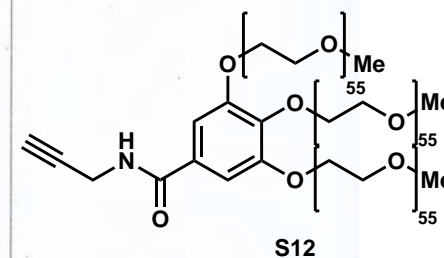



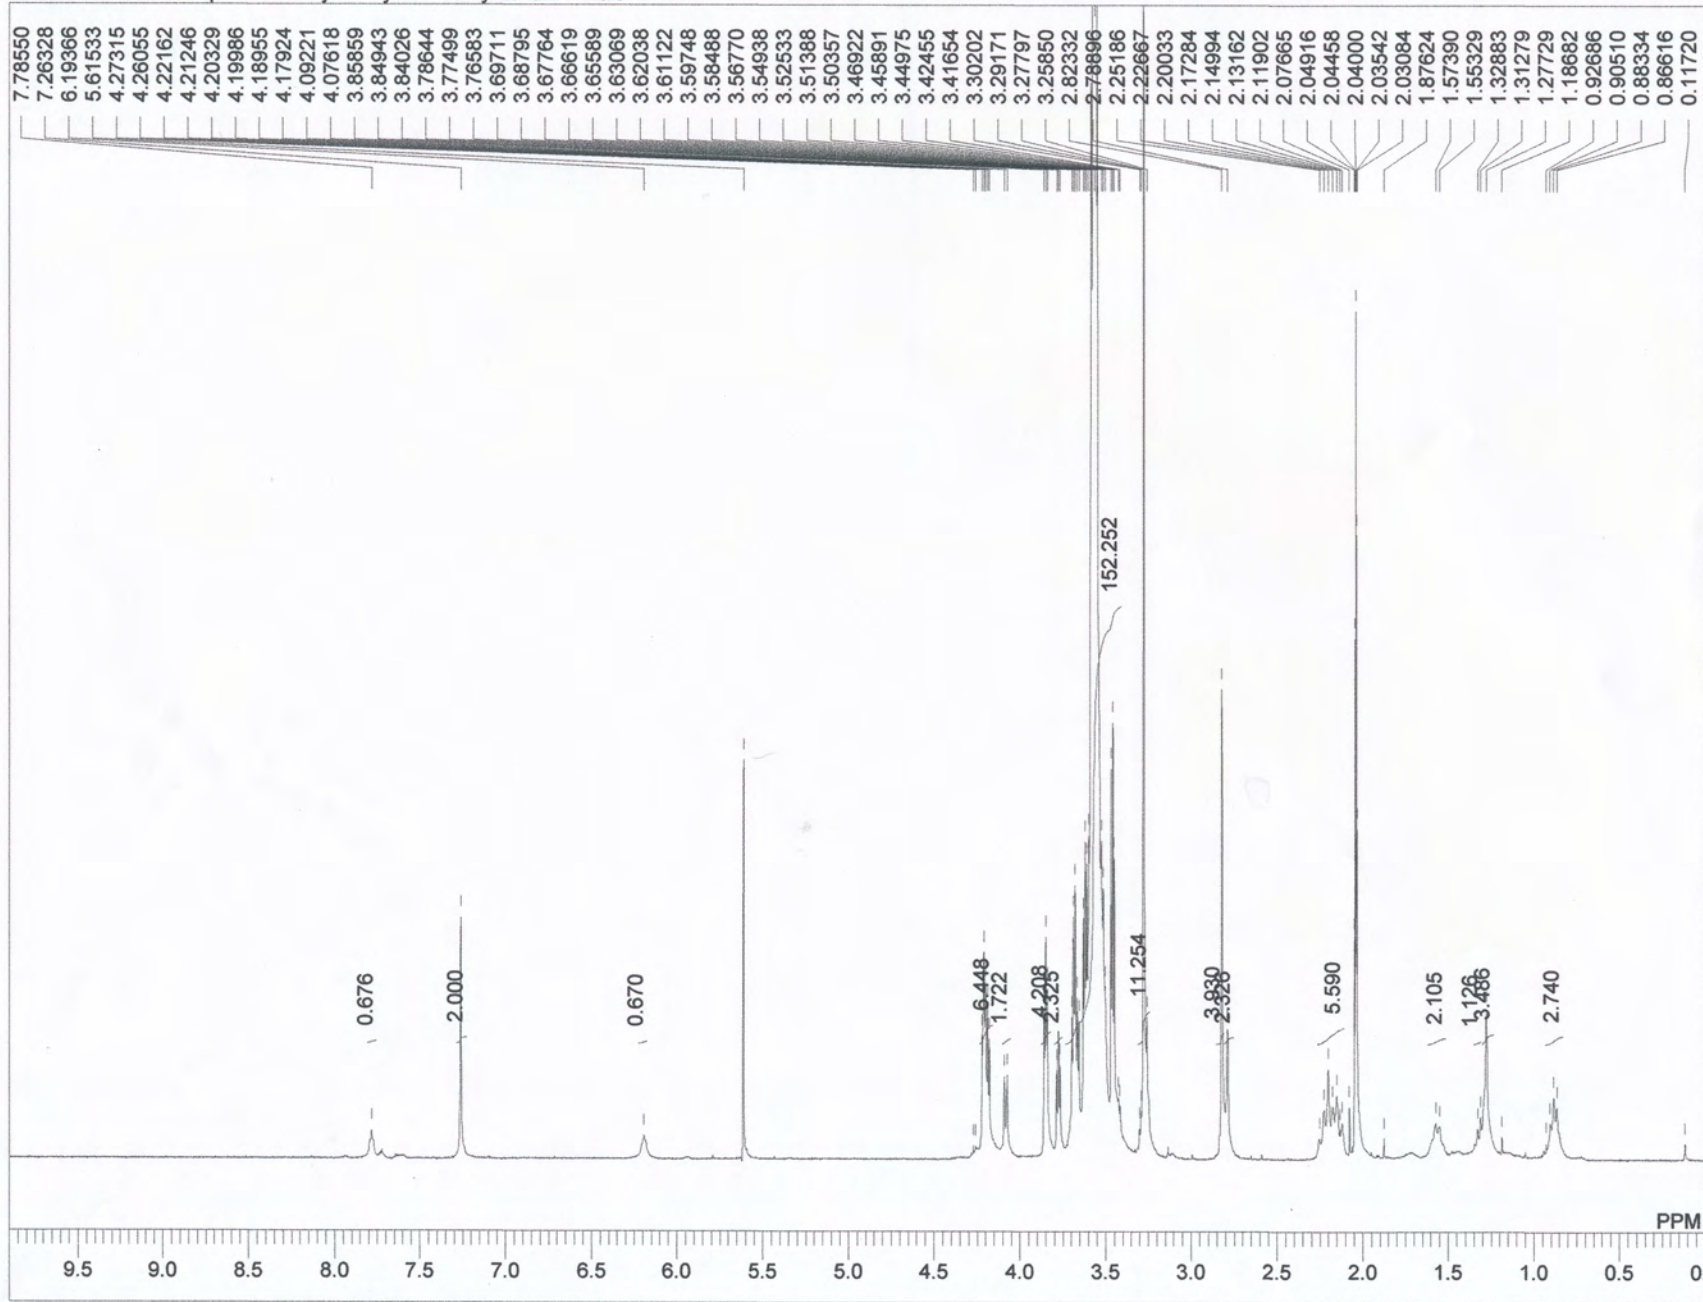

DFILE yf234tm-1-1.als  
 COMNT  
 DATIM 2018-02-03 21:19:42  
 OBNUC 1H  
 EXMOD proton.jxp  
 OBFRQ 500.16 MHz  
 OBSET 2.41 KHz  
 OBFIN 6.01 Hz  
 POINT 13107  
 FREQU 7507.51 Hz  
 SCANS 8  
 ACQTM 1.7459 sec  
 PD 5.0000 sec  
 PW1 5.55 usec  
 IRNUC 1H  
 CTEMP 21.5 c  
 SLVNT ACETN  
 EXREF 2.04 ppm  
 BF 0.12 Hz  
 RGAIN 30

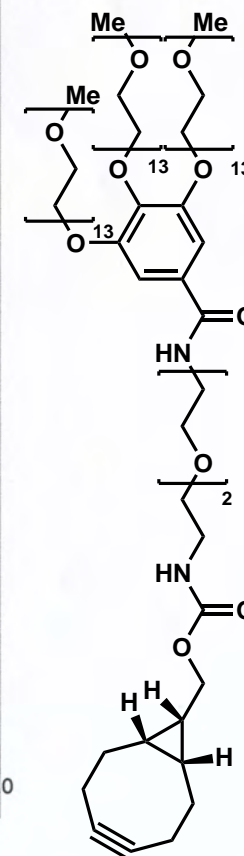





C:\Users\alice\Desktop\Gousei\Fujiwara\19\*\_1-1.plyf447TM-1-1.als

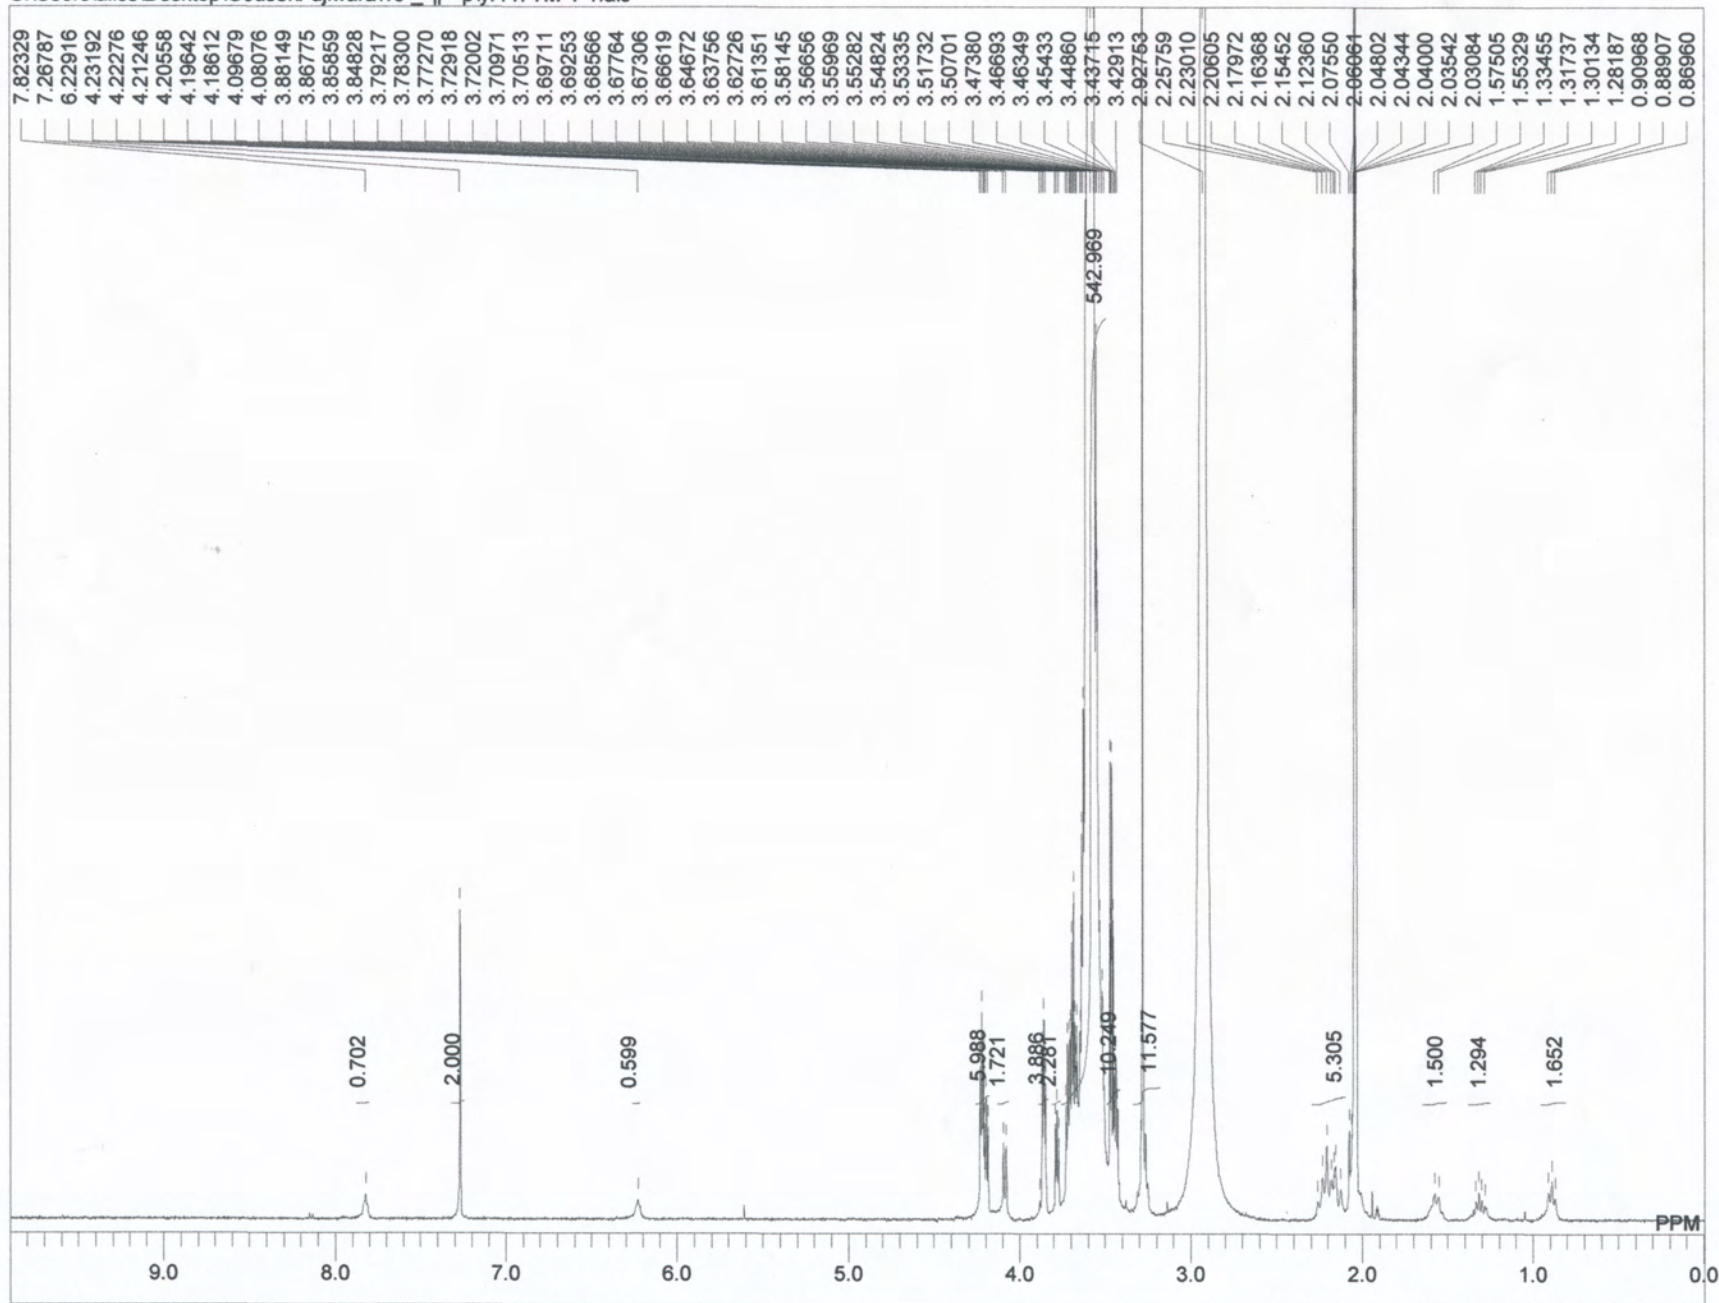

DFILE yf447TM-1-1.als  
 COMNT  
 DATIM 2019-09-07 15:12:56  
 OBNUC 1H  
 EXMOD proton.jxp  
 OBFRQ 500.16 MHz  
 OBSET 2.41 KHz  
 OBFIN 6.01 Hz  
 POINT 13107  
 FREQU 7507.51 Hz  
 SCANS 16  
 ACQTM 1.7459 sec  
 PD 6.0000 sec  
 PW1 5.55 usec  
 IRNUC 1H  
 CTEMP 21.7 c  
 SLVNT ACETN  
 EXREF 2.04 ppm  
 BF 0.12 Hz  
 RGAIN 34

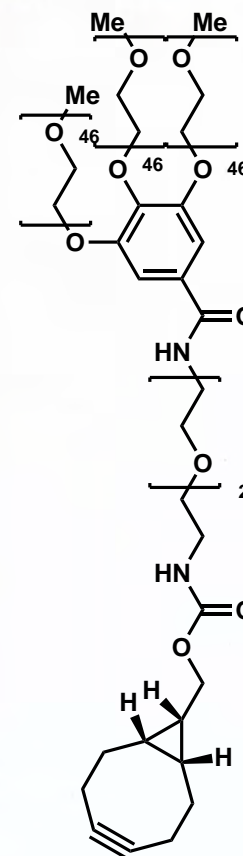

C:\Users\alice\Desktop\Gousei\Fujiwara\YF401-500\yf447TMC-2-1.als

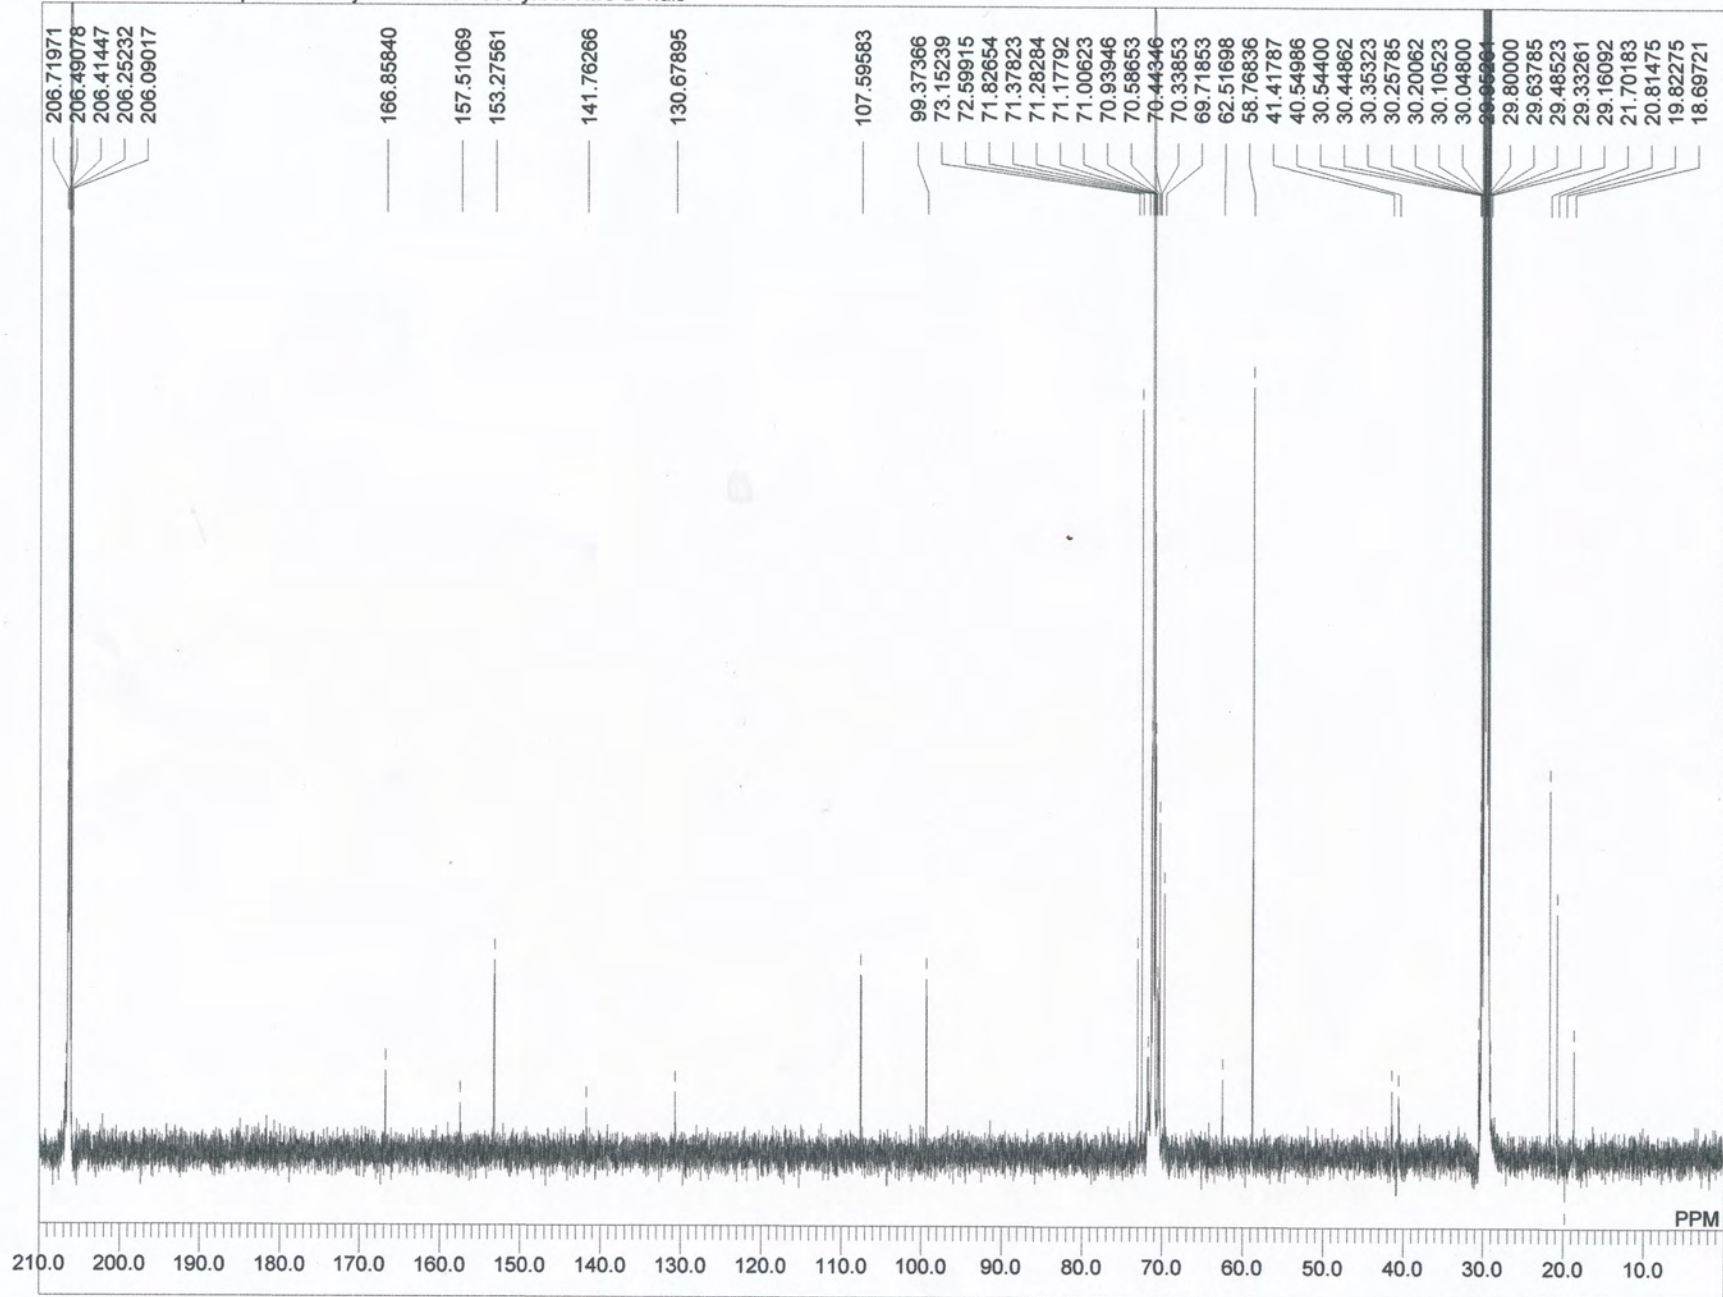

DFILE yf447TMC-2-1.als  
 COMNT  
 DATIM 2019-09-14 23:33:41  
 OBNUC 13C  
 EXMOD carbon.jxp  
 OBFRQ 125.77 MHz  
 OBSET 7.87 KHz  
 OBFIN 4.21 Hz  
 POINT 26214  
 FREQU 31446.54 Hz  
 SCANS 77995  
 ACQTM 0.8336 sec  
 PD 2.0000 sec  
 PW1 3.40 usec  
 IRNUC 1H  
 CTEMP 22.1 c  
 SLVNT ACETN  
 EXREF 29.80 ppm  
 BF 0.12 Hz  
 RGAIN 60

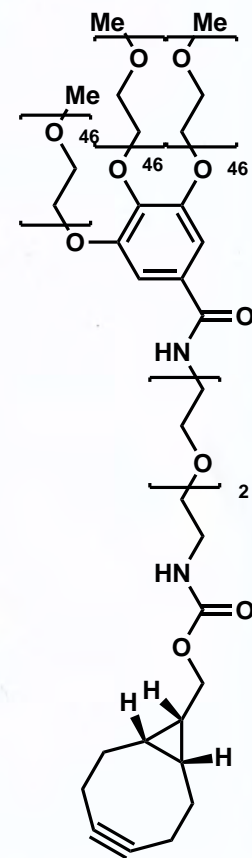

Supplement: pnas.2019554118.sapp.pdf [file pnas.2019554118.sapp.pdf]
